# Supplementary material for: Insights into Ag(i)-catalyzed addition reactions of amino alcohols to electron-deficient olefins: competing mechanisms, role of catalyst, and origin of chemoselectivity
Source: Royal Society of Chemistry journal article supplement (doi:10.1039/c8ra09065c), 2018-01-01
Supplement: c8ra09065c1.pdf [file c8ra09065c1.pdf]

## Electronic Supplementary Information for

# Insights to Ag(I)-catalyzed addition reactions of amino alcohols to electron-deficient olefins: Competing mechanisms, role of catalyst, and origin of chemoselectivity

Chunhui Liu<sup>a</sup>, Peilin Han<sup>a</sup>, Zhizhong Xie<sup>c</sup>, Zhihong Xu<sup>a\*</sup>, Donghui Wei<sup>b\*</sup>

<sup>a</sup>School of Chemistry and Chemical Engineering, Xuchang University of China, No.88 of Bayi Road , Xuchang, Henan Province, 461000, P. R. China.

<sup>b</sup>The College of Chemistry and Molecular Engineering, Center of Computational Chemistry, Zhengzhou University of China, No.100 of Science Road, Zhengzhou, Henan Province, 450001, P. R. China.

<sup>c</sup>Department of Chemistry, School of Chemistry, Chemical Engineering and Life Sciences, Wuhan University of Technology, Wuhan, Hubei Province, 430070, P. R. China.

## Contents

|                                                                                 |          |
|---------------------------------------------------------------------------------|----------|
| 1. Test the impact of different computational methods .....                     | S2       |
| 2. The possible reaction pathways via TS1'-O and TS1'-N .....                   | S3       |
| 3. Chemoselective addition reaction pathways catalyzed by the real system ..... | S4       |
| 4. Compared the hydrogen bond between Int1 and ADD2-O .....                     | S5       |
| 5. Parr function analysis.....                                                  | S6       |
| 6. Cartesian coordinates (Å) of the computed structures.....                    | S7-111   |
| 7. Absolute energies and Imaginary frequency for the computed structures ...    | S112-113 |

## 1. Test the impact of different computational methods

**Table S1.** Relative free energies ( $\Delta G$ ) [ $\text{kcal}\cdot\text{mol}^{-1}$ ] between TS1-O and **1+3'** geometries at the different theory levels.

| $\Delta G$ | Method1 | Method2 | Method3 |
|------------|---------|---------|---------|
| TS3        | 11.8    | 11.1    | 10.7    |
| 1+3'       | 0.0     | 0.0     | 0.0     |

Method1: Geometry B3LYP/SDD,6-31g(d), single point energies in solution M06/SDD,6-31+g(d,p).  
Method2: Geometry B3LYP/SDD,6-31g(d), single point energies in solution B97D/SDD,6-31+g(d,p).  
Method3: Geometry B3LYP/SDD,6-31g(d), single point energies in solution B3LYP-D3/ SDD,6-31+g(d,p).

To test the impact of different computational methods on the calculated results, we additionally computed the rate-determining step by using different computational methods. As summarized in **Table S1**, the free energies calculated by the different methods are very close and have small differences, which indicate that the calculated results should be reliable by using the selected computational method.

## 2. The possible reaction pathways via TS1'-O and TS1'-N

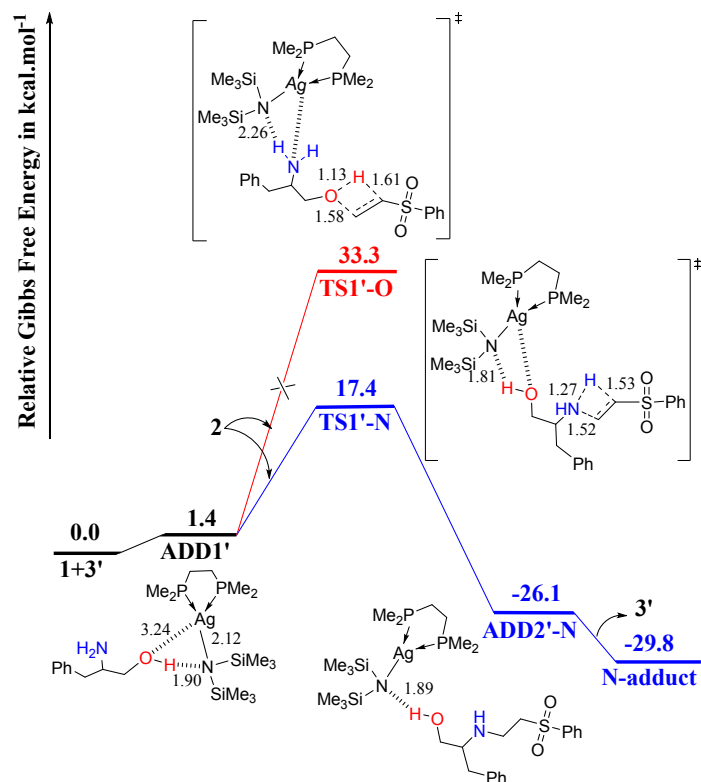

**Fig. S1** Computed Gibbs free-energy profiles (253 K) for the possible reaction pathways via TS1'-O and TS1'-N catalyzed by 3' (distances in Å).

### 3. Chemoselective addition reaction pathways catalyzed by the real system

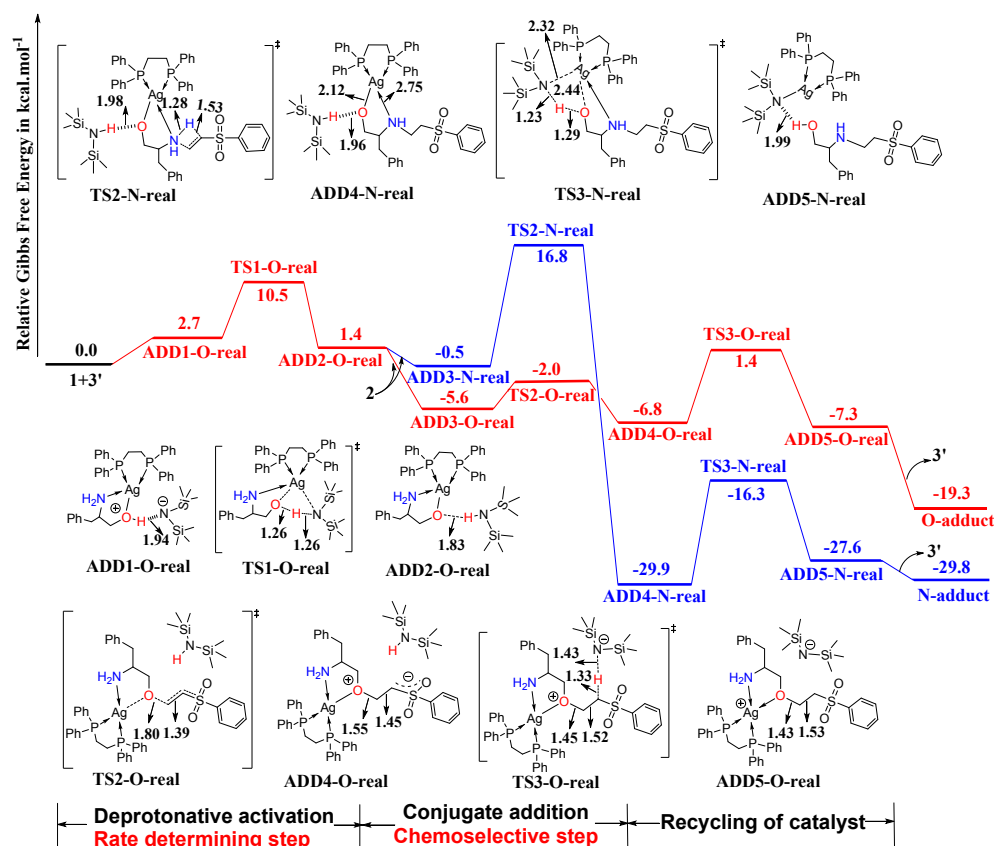

**Fig. S2** Computed free-energy profiles (253 K) for chemoselective addition reactions catalyzed by **3** system (distances in Å).

We additionally reoptimized all the structures depicted in **Fig. 2** with the actual dppe ligand by using catalyst **3**. The computed free-energy profiles and energy barriers (**Fig. S2**) showed the same trend and conclusions as the calculated results of the model systems. This indicates that the selected models and the computed results should be suitable and reliable.

#### 4. Compared the hydrogen bond between Int1 and ADD2-O

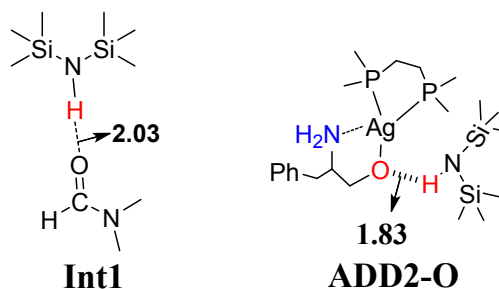

**Fig. S3** Computed structures of Int1 and ADD2-O (distances in Å).

In order to study if the HN(SiMe<sub>3</sub>)<sub>2</sub> molecule bonded to O atom of adduct or to DMF solution, we compared the hydrogen bond of Int1 (2.03 Å) with that of ADD2-O (1.83 Å), the hydrogen bond of ADD2-O is stronger than that of Int1, so the HN(SiMe<sub>3</sub>)<sub>2</sub> molecule hydrogen bonded to O atom of adduct is more favorable than hydrogen bonded to DMF.

## 5. Parr function analysis

Pioneered by Domingo and coworkers, the nucleophilic ( $P_k^-$ ) and electrophilic ( $P_k^+$ ) Parr functions which allow for the characterization of the nucleophilic and electrophilic sites of a molecule, can be obtained through the analysis of Mulliken atomic spin density (ASD) of the corresponding radical cations (RC) or anions (RA) of the studied molecules, separately. According to Domingo's definition, the Parr functions can be expressed by the following equations:

$$P^-(r) = \rho_S^{rc}(r) \text{ for the electrophilic attacks} \quad (1)$$

$$P^+(r) = \rho_S^{ra}(r) \text{ for the nucleophilic attacks} \quad (2)$$

where  $\rho_S^{rc}(r)$  is the ASD of the radical cation and  $\rho_S^{ra}(r)$  is the ASD of the radical anion. Each ASD condensed at the different atoms of the radical cation and radical anion provides the local nucleophilic  $P_k^-$  and electrophilic  $P_k^+$  Parr functions of the neutral system, respectively.

## 6. Cartesian coordinates (Å) of the computed structures

1

|   |             |             |             |
|---|-------------|-------------|-------------|
| C | 3.11692700  | 0.62118200  | 0.04204600  |
| H | 3.71491100  | 0.84865700  | 0.94416800  |
| H | 3.23952800  | 1.46140000  | -0.65104400 |
| C | 1.64155200  | 0.46535200  | 0.45197700  |
| H | 1.33880500  | 1.36012000  | 1.02389800  |
| O | 3.58865100  | -0.54408600 | -0.60297800 |
| H | 3.18190100  | -1.27215700 | -0.09249500 |
| N | 1.56141600  | -0.77329600 | 1.24587200  |
| H | 1.95180600  | -0.61912700 | 2.17452600  |
| H | 0.58943100  | -1.04703800 | 1.37752600  |
| C | 0.72890800  | 0.35074100  | -0.78839500 |
| H | 0.86278300  | 1.26302400  | -1.38309200 |
| H | 1.09219100  | -0.48387100 | -1.39693600 |
| C | -0.73658900 | 0.16794800  | -0.45557700 |
| C | -1.33064500 | -1.10286200 | -0.47231500 |
| C | -1.53225500 | 1.26643900  | -0.09460400 |
| C | -2.67550500 | -1.27319800 | -0.13297100 |
| H | -0.73391600 | -1.96446100 | -0.76382200 |
| C | -2.87567000 | 1.10169400  | 0.24250300  |
| H | -1.09320900 | 2.26209000  | -0.08580600 |
| C | -3.45225100 | -0.17112200 | 0.22621800  |
| H | -3.11587100 | -2.26670900 | -0.15659800 |
| H | -3.47478700 | 1.96732900  | 0.51337400  |
| H | -4.49952900 | -0.30055300 | 0.48572800  |

2

|   |            |             |             |
|---|------------|-------------|-------------|
| C | 5.62405600 | -0.98835900 | -1.10307800 |
| C | 4.25948000 | -0.70720800 | -1.00746700 |
| C | 3.83727700 | 0.37850900  | -0.23731300 |
| C | 4.76098500 | 1.19315500  | 0.42333200  |
| C | 6.12183100 | 0.90417800  | 0.32253200  |
| C | 6.55379900 | -0.18790200 | -0.43574000 |
| H | 5.96079100 | -1.82685100 | -1.70697100 |
| H | 3.52480200 | -1.29885500 | -1.54326800 |
| H | 4.41278500 | 2.05269900  | 0.98731000  |
| H | 6.84630500 | 1.53668000  | 0.82842200  |
| H | 7.61508000 | -0.40803100 | -0.51421500 |
| S | 2.06973000 | 0.73153600  | -0.05949300 |
| O | 1.95173300 | 2.19589600  | 0.04844000  |
| O | 1.41422000 | 0.00472900  | -1.18498400 |
| C | 1.48943900 | 0.01614200  | 1.41765900  |
| H | 1.86831300 | 0.50340800  | 2.31104600  |
| C | 1.27322015 | -1.30626618 | 1.42693368  |
| H | 1.62886615 | -1.90059018 | 0.58418468  |
| H | 1.42949815 | -1.81375618 | 2.37754068  |

3'

|    |             |             |             |
|----|-------------|-------------|-------------|
| Ag | 0.05639200  | -0.64846800 | -0.33163600 |
| P  | 2.23800800  | -1.57340000 | -0.54803600 |
| C  | 3.49644500  | -1.03608400 | 0.72095200  |
| H  | 4.33479700  | -1.74518600 | 0.67699600  |
| H  | 3.01911800  | -1.17301900 | 1.69908500  |
| C  | 4.03506000  | 0.40009000  | 0.58569400  |
| H  | 4.71464300  | 0.59567300  | 1.42720200  |
| H  | 4.63912800  | 0.48023700  | -0.32729800 |
| P  | 2.73932600  | 1.76368100  | 0.48485500  |
| C  | 3.09056100  | -1.30119900 | -2.16364100 |
| H  | 4.10101500  | -1.72602900 | -2.16369400 |
| H  | 2.50587300  | -1.77149700 | -2.96042900 |
| H  | 3.14633500  | -0.22962300 | -2.37484400 |
| C  | 2.29156600  | -3.41180000 | -0.35714700 |
| H  | 1.90258100  | -3.68791800 | 0.62800700  |
| H  | 1.65188500  | -3.87665200 | -1.11360200 |
| H  | 3.31170200  | -3.79913500 | -0.46122000 |
| C  | 3.89237800  | 3.22645300  | 0.59484400  |
| H  | 3.30044600  | 4.14342100  | 0.68480800  |
| H  | 4.57681400  | 3.16556600  | 1.45036900  |
| H  | 4.48226200  | 3.30356400  | -0.32497100 |
| C  | 2.09120800  | 1.74241400  | 2.23188600  |
| H  | 2.89231400  | 1.75059400  | 2.98210800  |
| H  | 1.45661300  | 2.62200000  | 2.38422800  |
| H  | 1.45942000  | 0.86178700  | 2.38668100  |
| N  | -1.88503700 | 0.05987400  | -0.06747200 |
| Si | -2.28681100 | 1.50243600  | -0.93066200 |
| Si | -2.90740200 | -0.88879000 | 0.94976700  |
| C  | -4.01509900 | 0.16604000  | 2.08790500  |
| H  | -4.63981400 | -0.47161700 | 2.72752300  |
| H  | -3.41127700 | 0.80606000  | 2.74351600  |
| H  | -4.68955600 | 0.81969500  | 1.52142000  |
| C  | -4.05323900 | -2.05125500 | -0.03269800 |
| H  | -4.72313500 | -1.48647000 | -0.69220800 |
| H  | -3.46601200 | -2.72831300 | -0.66698900 |
| H  | -4.67746900 | -2.66810300 | 0.62777200  |
| C  | -1.87504200 | -2.00428600 | 2.10290400  |
| H  | -1.20231800 | -1.40796800 | 2.73321400  |
| H  | -2.52368900 | -2.58945800 | 2.76877300  |
| H  | -1.26151200 | -2.71773300 | 1.53570800  |
| C  | -4.04790400 | 1.46717600  | -1.65992400 |
| H  | -4.26293500 | 2.39281400  | -2.21021700 |
| H  | -4.16890100 | 0.62948700  | -2.35818200 |
| H  | -4.81751400 | 1.36263400  | -0.88533600 |
| C  | -2.15898100 | 3.06038500  | 0.15889300  |
| H  | -2.38711300 | 3.97545200  | -0.40394000 |
| H  | -2.84974200 | 3.01090800  | 1.00951900  |
| H  | -1.14431900 | 3.16214600  | 0.56594500  |



|                 |             |             |             |
|-----------------|-------------|-------------|-------------|
| C               | -1.09848700 | 1.76560900  | -2.39635000 |
| H               | -0.05927700 | 1.87383400  | -2.05781600 |
| H               | -1.13981900 | 0.92072400  | -3.09621700 |
| H               | -1.35755700 | 2.67447100  | -2.95635800 |
| <b>4'</b>       |             |             |             |
| O               | -2.76768000 | -0.23101400 | -1.06526400 |
| C               | -3.27692000 | -0.11815200 | 0.09769200  |
| C               | -4.79777700 | -0.08050900 | 0.19397500  |
| H               | -5.12710100 | -0.08440100 | 1.23522000  |
| H               | -5.17196000 | 0.82317200  | -0.30088400 |
| H               | -5.22607300 | -0.93802600 | -0.33541200 |
| O               | -2.58655800 | -0.02616600 | 1.15203000  |
| Ag              | -0.62884200 | -0.16893100 | -0.25709500 |
| P               | 1.36777900  | -1.62496700 | 0.03616400  |
| C               | 2.66651200  | -0.43086600 | 0.67004200  |
| H               | 3.65842400  | -0.89963300 | 0.61973500  |
| H               | 2.44681000  | -0.26967900 | 1.73349800  |
| C               | 2.67882700  | 0.91982900  | -0.07370100 |
| H               | 3.46521800  | 1.56575800  | 0.33933000  |
| H               | 2.92397400  | 0.76291400  | -1.13250600 |
| P               | 1.02879900  | 1.81350700  | -0.03182700 |
| C               | 2.21581600  | -2.38620600 | -1.42763900 |
| H               | 3.19401500  | -2.80492600 | -1.16201000 |
| H               | 1.58565500  | -3.18288600 | -1.83550000 |
| H               | 2.34919500  | -1.63499000 | -2.21249600 |
| C               | 1.47211800  | -2.98421800 | 1.29011200  |
| H               | 1.07006200  | -2.63065200 | 2.24464000  |
| H               | 0.85417900  | -3.82482800 | 0.95909000  |
| H               | 2.50095900  | -3.33422400 | 1.43734400  |
| C               | 1.39858200  | 3.27641500  | -1.11412100 |
| H               | 0.55206900  | 3.96952300  | -1.07971600 |
| H               | 2.30531200  | 3.80740700  | -0.79975700 |
| H               | 1.51829600  | 2.94615000  | -2.15094800 |
| C               | 1.04964900  | 2.58451900  | 1.65561600  |
| H               | 1.96104000  | 3.16787100  | 1.83487900  |
| H               | 0.17832200  | 3.23912400  | 1.75756500  |
| H               | 0.96158900  | 1.80655100  | 2.42035700  |
| <b>N-adduct</b> |             |             |             |
| C               | 2.60524000  | 2.00490800  | -1.01850700 |
| C               | 1.93889500  | 1.06855600  | -0.22578600 |
| C               | 2.54480400  | -0.16815000 | 0.00804900  |
| C               | 3.80202900  | -0.47984900 | -0.51667200 |
| C               | 4.45596900  | 0.46475900  | -1.30764300 |
| C               | 3.85655700  | 1.70234500  | -1.56037000 |
| H               | 2.14568600  | 2.97131700  | -1.20416100 |
| H               | 0.97816700  | 1.29923300  | 0.22276800  |

|   |             |             |             |
|---|-------------|-------------|-------------|
| H | 4.26430800  | -1.43414200 | -0.28512000 |
| H | 5.43623300  | 0.23931700  | -1.71774300 |
| H | 4.37175600  | 2.43586600  | -2.17450900 |
| S | 1.70121000  | -1.38388600 | 1.03451100  |
| O | 2.72154900  | -2.20964900 | 1.69903200  |
| O | 0.67668300  | -0.66709100 | 1.82142200  |
| C | 0.83601100  | -2.47465000 | -0.14855500 |
| H | 1.61871800  | -2.89991900 | -0.78379500 |
| C | -0.26245900 | -1.80998500 | -0.97983200 |
| H | 0.15611200  | -0.94844900 | -1.53087200 |
| H | -0.56765200 | -2.53924000 | -1.74030600 |
| C | -3.44431500 | -2.08746800 | -1.37883100 |
| H | -2.90551300 | -2.70197300 | -2.12255500 |
| H | -4.36026700 | -1.72626500 | -1.86028100 |
| C | -2.55368700 | -0.90416300 | -0.95246800 |
| H | -2.19684800 | -0.38363000 | -1.85942400 |
| O | -3.82165200 | -2.85780700 | -0.25679800 |
| H | -3.00137500 | -2.90660500 | 0.27330300  |
| N | -1.42928600 | -1.45705300 | -0.17653700 |
| H | 0.42381500  | -3.26779800 | 0.48414400  |
| H | -1.13889000 | -0.81631300 | 0.55924500  |
| C | -3.34660700 | 0.10992800  | -0.09751700 |
| H | -4.25789700 | 0.36850400  | -0.65083200 |
| H | -3.67045400 | -0.39392900 | 0.81976400  |
| C | -2.57373800 | 1.37176400  | 0.22607500  |
| C | -1.95075600 | 1.54876300  | 1.46939700  |
| C | -2.44331100 | 2.38977000  | -0.73226200 |
| C | -1.21034900 | 2.70181700  | 1.74555400  |
| H | -2.04245300 | 0.77864900  | 2.23126200  |
| C | -1.71022700 | 3.54474300  | -0.46035400 |
| H | -2.93006600 | 2.27731600  | -1.69909600 |
| C | -1.08800300 | 3.70388600  | 0.78172800  |
| H | -0.73374500 | 2.81381900  | 2.71548900  |
| H | -1.63139800 | 4.32460100  | -1.21370100 |
| H | -0.52155000 | 4.60572200  | 0.99874500  |

### O-adduct

|   |            |             |             |
|---|------------|-------------|-------------|
| C | 5.46565700 | -1.19565100 | -0.75126400 |
| C | 4.14200100 | -0.77304600 | -0.88954600 |
| C | 3.72246200 | 0.37238400  | -0.21026000 |
| C | 4.60212500 | 1.11094100  | 0.58590400  |
| C | 5.92102600 | 0.67716700  | 0.71905400  |
| C | 6.35014100 | -0.47569200 | 0.05486800  |
| H | 5.80619100 | -2.08229600 | -1.27842400 |
| H | 3.44472600 | -1.30244600 | -1.53014800 |
| H | 4.26196200 | 2.02088500  | 1.07019100  |
| H | 6.61593300 | 1.24380900  | 1.33223200  |
| H | 7.37941100 | -0.80770200 | 0.15913800  |
| S | 2.01658900 | 0.93135400  | -0.37816100 |

|   |             |             |             |
|---|-------------|-------------|-------------|
| O | 2.01678000  | 2.40253200  | -0.32319100 |
| O | 1.44359400  | 0.22345200  | -1.54541300 |
| C | 1.17496100  | 0.34239200  | 1.12417500  |
| H | 1.69293600  | 0.82787800  | 1.95629800  |
| C | 1.07672900  | -1.19081700 | 1.29505800  |
| H | 1.75337100  | -1.71440200 | 0.60404800  |
| H | 1.39754700  | -1.44429800 | 2.31037800  |
| C | -0.75629000 | -1.89878000 | -0.12696900 |
| H | 0.02351200  | -1.73756100 | -0.88094600 |
| H | -1.07934500 | -2.94766900 | -0.18827900 |
| C | -1.96360600 | -1.00218600 | -0.43913800 |
| H | -2.37392300 | -1.38983300 | -1.39222500 |
| O | -0.23787600 | -1.69345600 | 1.18661600  |
| H | 0.16364700  | 0.75665500  | 1.02020200  |
| N | -1.54747200 | 0.39881600  | -0.53751900 |
| H | -0.86755600 | 0.51001900  | -1.28924800 |
| H | -2.35068400 | 0.98433200  | -0.75878100 |
| C | -3.06196900 | -1.15282200 | 0.63686100  |
| H | -3.30135700 | -2.22003900 | 0.73128900  |
| H | -2.63854100 | -0.82919800 | 1.59262000  |
| C | -4.32292200 | -0.37500300 | 0.32492300  |
| C | -4.54006200 | 0.89967100  | 0.86878300  |
| C | -5.29548700 | -0.90075100 | -0.53942100 |
| C | -5.69023700 | 1.62849800  | 0.55665000  |
| H | -3.79952100 | 1.32055300  | 1.54473100  |
| C | -6.44650700 | -0.17738200 | -0.85298100 |
| H | -5.14997500 | -1.89161900 | -0.96530800 |
| C | -6.64771700 | 1.09215600  | -0.30556400 |
| H | -5.83898700 | 2.61352000  | 0.99174400  |
| H | -7.18909400 | -0.60648100 | -1.52098400 |
| H | -7.54517700 | 1.65582600  | -0.54620800 |

**TS1-N-non**

|   |             |             |             |
|---|-------------|-------------|-------------|
| C | -3.47224800 | 2.09625600  | -0.96739700 |
| C | -2.63430100 | 0.97963000  | -0.92968900 |
| C | -2.96104600 | -0.09374700 | -0.09772700 |
| C | -4.11902500 | -0.06805200 | 0.68490300  |
| C | -4.94946600 | 1.05161400  | 0.64118000  |
| C | -4.62528600 | 2.13521900  | -0.18058700 |
| H | -3.22915900 | 2.93135500  | -1.61917700 |
| H | -1.75014600 | 0.91880100  | -1.55509200 |
| H | -4.37142700 | -0.92757600 | 1.29777200  |
| H | -5.85519200 | 1.07520000  | 1.24126500  |
| H | -5.27677600 | 3.00439000  | -0.21448700 |
| S | -1.86102500 | -1.52899000 | 0.00978000  |
| O | -2.73341800 | -2.69425200 | 0.24261600  |
| O | -1.01542600 | -1.46180600 | -1.22318800 |
| C | -0.76201600 | -1.35040400 | 1.34919100  |
| H | -1.27402900 | -1.31224800 | 2.30860700  |

|   |            |             |             |
|---|------------|-------------|-------------|
| C | 0.38259900 | -0.38600400 | 1.08999600  |
| H | 0.21375400 | 0.50489200  | 0.48092900  |
| H | 0.87321000 | -0.09854000 | 2.02272700  |
| C | 3.24893500 | -2.79597300 | 0.11684400  |
| H | 2.85816400 | -3.50242100 | 0.86268700  |
| H | 4.34267100 | -2.82978100 | 0.16216800  |
| C | 2.77426000 | -1.37083400 | 0.46097200  |
| H | 3.01947700 | -1.16608800 | 1.51068900  |
| O | 2.88631800 | -3.17754800 | -1.20171300 |
| H | 1.97999200 | -3.52263500 | -1.18902900 |
| N | 1.29474000 | -1.37037300 | 0.36130700  |
| H | 0.51516900 | -2.16378100 | 0.89475800  |
| H | 0.96332300 | -1.39832000 | -0.61247400 |
| C | 3.45348500 | -0.32725300 | -0.45389600 |
| H | 4.53685900 | -0.43469400 | -0.30677800 |
| H | 3.25376800 | -0.61389100 | -1.49242500 |
| C | 3.05086200 | 1.11291800  | -0.21718600 |
| C | 2.23054800 | 1.78784600  | -1.13109700 |
| C | 3.48977200 | 1.80349200  | 0.92227500  |
| C | 1.84913100 | 3.11333600  | -0.90933400 |
| H | 1.89166500 | 1.27189300  | -2.02674100 |
| C | 3.11002900 | 3.12674700  | 1.14860200  |
| H | 4.14244200 | 1.30306000  | 1.63529100  |
| C | 2.28550000 | 3.78567200  | 0.23316600  |
| H | 1.21502800 | 3.61997700  | -1.63193700 |
| H | 3.46276000 | 3.64579500  | 2.03591300  |
| H | 1.99147700 | 4.81712500  | 0.40668700  |

**TS1-O-non**

|   |             |             |             |
|---|-------------|-------------|-------------|
| C | 5.62405600  | -0.98835900 | -1.10307800 |
| C | 4.25948000  | -0.70720800 | -1.00746700 |
| C | 3.83727700  | 0.37850900  | -0.23731300 |
| C | 4.76098500  | 1.19315500  | 0.42333200  |
| C | 6.12183100  | 0.90417800  | 0.32253200  |
| C | 6.55379900  | -0.18790200 | -0.43574000 |
| H | 5.96079100  | -1.82685100 | -1.70697100 |
| H | 3.52480200  | -1.29885500 | -1.54326800 |
| H | 4.41278500  | 2.05269900  | 0.98731000  |
| H | 6.84630500  | 1.53668000  | 0.82842200  |
| H | 7.61508000  | -0.40803100 | -0.51421500 |
| S | 2.06973000  | 0.73153600  | -0.05949300 |
| O | 1.95173300  | 2.19589600  | 0.04844000  |
| O | 1.41422000  | 0.00472900  | -1.18498400 |
| C | 1.48943900  | 0.01614200  | 1.41765900  |
| H | 1.86831300  | 0.50340800  | 2.31104600  |
| C | 1.25230100  | -1.43420900 | 1.42783100  |
| H | 1.60794700  | -2.02853300 | 0.58508200  |
| H | 1.40857900  | -1.94169900 | 2.37843800  |
| C | -0.91633800 | -1.90513600 | 0.04435100  |

|   |             |             |             |
|---|-------------|-------------|-------------|
| H | -0.15483300 | -1.88155000 | -0.74091900 |
| H | -1.23177600 | -2.93501900 | 0.23467400  |
| C | -2.09745600 | -1.01301000 | -0.34788500 |
| H | -2.44681800 | -1.41138200 | -1.31991200 |
| O | -0.32148400 | -1.38917400 | 1.27059300  |
| H | -0.08993600 | -0.24699700 | 1.23459500  |
| N | -1.61776500 | 0.36125000  | -0.41068400 |
| H | -0.83779500 | 0.45786300  | -1.06076900 |
| H | -2.36168200 | 0.99571300  | -0.68877700 |
| C | -3.27147800 | -1.12583800 | 0.65296100  |
| H | -3.54921800 | -2.18471200 | 0.73596000  |
| H | -2.91630300 | -0.80155800 | 1.63680600  |
| C | -4.48197600 | -0.31383100 | 0.24247700  |
| C | -4.68419900 | 0.98221300  | 0.73922600  |
| C | -5.41531600 | -0.83085800 | -0.66842700 |
| C | -5.78434700 | 1.74159500  | 0.33405000  |
| H | -3.97307500 | 1.39588600  | 1.45020900  |
| C | -6.51629100 | -0.07612400 | -1.07430200 |
| H | -5.28103900 | -1.83836200 | -1.05746300 |
| C | -6.70387300 | 1.21465700  | -0.57419600 |
| H | -5.92363000 | 2.74320800  | 0.73233400  |
| H | -7.23049100 | -0.49734900 | -1.77715200 |
| H | -7.56243300 | 1.80265700  | -0.88720500 |

### ADD1-O

|    |             |            |             |
|----|-------------|------------|-------------|
| Ag | 1.43919500  | 0.40934400 | 0.74798200  |
| P  | 0.03978800  | 1.94991900 | 1.91111600  |
| C  | -1.35810100 | 2.74831400 | 0.96704100  |
| H  | -2.13616700 | 2.99693600 | 1.70242300  |
| H  | -1.77048100 | 1.96733600 | 0.31523200  |
| C  | -1.01013900 | 4.01621200 | 0.16589200  |
| H  | -1.93286800 | 4.40198700 | -0.29081000 |
| H  | -0.65210900 | 4.79887900 | 0.84716600  |
| P  | 0.30488000  | 3.81184000 | -1.16331000 |
| C  | 0.82298600  | 3.34160800 | 2.84235100  |
| H  | 0.07393800  | 3.95361800 | 3.35795300  |
| H  | 1.51478900  | 2.92845500 | 3.58324900  |
| H  | 1.39819100  | 3.97208200 | 2.15856400  |
| C  | -0.88907400 | 1.05226900 | 3.23522600  |
| H  | -1.49494000 | 0.26523800 | 2.77585100  |
| H  | -0.18384200 | 0.57519100 | 3.92249300  |
| H  | -1.54156100 | 1.72919400 | 3.79931100  |
| C  | 0.26503600  | 5.54757300 | -1.84752200 |
| H  | 0.85663700  | 5.58489700 | -2.76848500 |
| H  | -0.75282900 | 5.89150700 | -2.07119900 |
| H  | 0.72254400  | 6.24024100 | -1.13277300 |
| C  | -0.70178700 | 2.93597000 | -2.46355000 |
| H  | -1.62654100 | 3.47526300 | -2.70697900 |
| H  | -0.10448900 | 2.82740400 | -3.37477800 |

|    |             |             |             |
|----|-------------|-------------|-------------|
| H  | -0.95807400 | 1.93310800  | -2.10840700 |
| N  | 2.43387500  | -1.24415600 | -0.15885800 |
| H  | 0.56880700  | -1.70572400 | -0.40962600 |
| Si | 3.29198600  | -0.81289200 | -1.60651500 |
| Si | 2.91007200  | -2.49879300 | 0.95156100  |
| C  | 4.75885400  | -2.45799400 | 1.41129700  |
| H  | 5.00064300  | -3.24317700 | 2.13999900  |
| H  | 5.40652700  | -2.61161600 | 0.53925700  |
| H  | 5.03361100  | -1.49370200 | 1.85766900  |
| C  | 1.93538600  | -2.34897100 | 2.57947300  |
| H  | 2.19826900  | -1.43377200 | 3.12710300  |
| H  | 0.85521200  | -2.33573800 | 2.38879000  |
| H  | 2.14734500  | -3.19979500 | 3.24105600  |
| C  | 2.52954200  | -4.23052100 | 0.25925600  |
| H  | 3.08761800  | -4.43916900 | -0.66060500 |
| H  | 2.78503400  | -5.01217900 | 0.98688000  |
| H  | 1.46116100  | -4.32795000 | 0.02909400  |
| C  | 3.94253400  | -2.32570300 | -2.56554200 |
| H  | 4.43244400  | -2.00526900 | -3.49454600 |
| H  | 4.68041500  | -2.89796400 | -1.99026600 |
| H  | 3.13241500  | -3.01294600 | -2.83850300 |
| C  | 2.14315900  | 0.13009800  | -2.79428200 |
| H  | 2.67782400  | 0.42377300  | -3.70748200 |
| H  | 1.28455900  | -0.48389900 | -3.09422400 |
| H  | 1.75436000  | 1.04443400  | -2.32878200 |
| C  | 4.78490800  | 0.32195300  | -1.27719000 |
| H  | 4.46650700  | 1.25457900  | -0.79286100 |
| H  | 5.51421400  | -0.15923700 | -0.61421000 |
| H  | 5.30435600  | 0.58991100  | -2.20713600 |
| C  | -1.10167900 | -2.07894900 | -1.43086600 |
| H  | -0.62728400 | -1.62466100 | -2.31643700 |
| H  | -1.10445400 | -3.17101500 | -1.59179400 |
| C  | -2.56279200 | -1.61385800 | -1.36880200 |
| H  | -3.07578200 | -2.12084900 | -2.20797000 |
| O  | -0.40952800 | -1.74612400 | -0.24828100 |
| N  | -2.65285900 | -0.14774300 | -1.49032500 |
| H  | -2.33892900 | 0.12561500  | -2.42084400 |
| H  | -3.63364800 | 0.12693000  | -1.43456700 |
| C  | -3.24657600 | -2.07312600 | -0.06377800 |
| H  | -3.08343500 | -3.15322600 | 0.04002500  |
| H  | -2.73324900 | -1.58955000 | 0.77250000  |
| C  | -4.73087200 | -1.77494600 | -0.02511500 |
| C  | -5.23072700 | -0.65543800 | 0.65619900  |
| C  | -5.64601000 | -2.60234900 | -0.69498300 |
| C  | -6.59801300 | -0.36746400 | 0.66603100  |
| H  | -4.53846000 | -0.00851500 | 1.19070500  |
| C  | -7.01205500 | -2.32023400 | -0.68783000 |
| H  | -5.28121100 | -3.48210100 | -1.22127600 |
| C  | -7.49388500 | -1.19921900 | -0.00695000 |
| H  | -6.96256100 | 0.50363200  | 1.20484200  |

|   |             |             |             |
|---|-------------|-------------|-------------|
| H | -7.70222800 | -2.97883100 | -1.20902900 |
| H | -8.55831000 | -0.98034400 | 0.00291500  |

**TS1-O**

|    |             |             |             |
|----|-------------|-------------|-------------|
| Ag | 0.87611100  | 0.20181900  | 0.63700300  |
| P  | -0.29024800 | 1.84814700  | 1.90584600  |
| C  | -1.43595700 | 2.98376700  | 0.96843900  |
| H  | -2.18021300 | 3.35989800  | 1.68443800  |
| H  | -1.96712200 | 2.34159100  | 0.25526400  |
| C  | -0.78061400 | 4.17811400  | 0.25196600  |
| H  | -1.56888000 | 4.76149900  | -0.24496600 |
| H  | -0.32073600 | 4.84616800  | 0.99154600  |
| P  | 0.55921500  | 3.74989600  | -0.99666700 |
| C  | 0.67935200  | 2.98219000  | 2.99847600  |
| H  | 0.02838000  | 3.67483500  | 3.54487500  |
| H  | 1.24335300  | 2.38140100  | 3.71904300  |
| H  | 1.39688100  | 3.55190400  | 2.40141500  |
| C  | -1.46649200 | 1.06615600  | 3.10224800  |
| H  | -2.18221800 | 0.44573800  | 2.55441000  |
| H  | -0.91632100 | 0.41639600  | 3.78984900  |
| H  | -2.01200300 | 1.82177800  | 3.67993000  |
| C  | 0.87584000  | 5.47190700  | -1.64310000 |
| H  | 1.54173600  | 5.41479100  | -2.51076100 |
| H  | -0.04578100 | 5.98687300  | -1.94276000 |
| H  | 1.38133600  | 6.07049800  | -0.87745000 |
| C  | -0.49982300 | 3.08228900  | -2.37593900 |
| H  | -1.30496800 | 3.77463600  | -2.65459500 |
| H  | 0.12557600  | 2.89523100  | -3.25548500 |
| H  | -0.93748800 | 2.12817300  | -2.06565000 |
| N  | 2.33773800  | -1.36138100 | -0.19100200 |
| H  | 1.19964800  | -1.69365700 | -0.58367700 |
| Si | 3.39464900  | -0.68496300 | -1.42114900 |
| Si | 2.84075000  | -2.52525000 | 1.03306600  |
| C  | 4.52349900  | -2.08736900 | 1.79855300  |
| H  | 4.77698000  | -2.80107400 | 2.59333100  |
| H  | 5.33864900  | -2.11359300 | 1.06565300  |
| H  | 4.51141800  | -1.08536900 | 2.24512000  |
| C  | 1.55923300  | -2.57542200 | 2.43084300  |
| H  | 1.56796300  | -1.64963400 | 3.02170300  |
| H  | 0.55264500  | -2.70778500 | 2.01746800  |
| H  | 1.75944500  | -3.40815300 | 3.11817500  |
| C  | 2.94228000  | -4.27315500 | 0.29902000  |
| H  | 3.70012500  | -4.34696900 | -0.48940900 |
| H  | 3.18982200  | -5.01481900 | 1.06961600  |
| H  | 1.97808300  | -4.55864900 | -0.13943100 |
| C  | 4.52758100  | -1.99018200 | -2.21480200 |
| H  | 5.12895400  | -1.54192700 | -3.01664200 |
| H  | 5.22585100  | -2.42987500 | -1.49244300 |
| H  | 3.94757900  | -2.81017400 | -2.65556100 |

|   |             |             |             |
|---|-------------|-------------|-------------|
| C | 2.32619200  | 0.05480100  | -2.80216800 |
| H | 2.95473600  | 0.51312400  | -3.57686900 |
| H | 1.70683400  | -0.71192500 | -3.28237300 |
| H | 1.65623000  | 0.83068900  | -2.41281100 |
| C | 4.49651900  | 0.69635800  | -0.72765800 |
| H | 3.88611000  | 1.51054100  | -0.31688600 |
| H | 5.15255700  | 0.33404400  | 0.07244600  |
| H | 5.13423500  | 1.12119600  | -1.51431200 |
| C | -0.83398000 | -1.95068900 | -1.68368700 |
| H | -0.41537700 | -1.46824200 | -2.59287400 |
| H | -0.86236900 | -3.03694300 | -1.90436100 |
| C | -2.30663900 | -1.49958400 | -1.57688700 |
| H | -2.83476600 | -1.97824100 | -2.42417700 |
| O | -0.07908400 | -1.69282000 | -0.54936700 |
| N | -2.42088600 | -0.02823000 | -1.65150100 |
| H | -2.08750700 | 0.27009400  | -2.56791100 |
| H | -3.40895700 | 0.22551500  | -1.62110500 |
| C | -2.95872500 | -2.00985900 | -0.27683800 |
| H | -2.77217900 | -3.08920400 | -0.21219800 |
| H | -2.43424200 | -1.54580200 | 0.56389500  |
| C | -4.44740600 | -1.74601900 | -0.19845100 |
| C | -4.95831000 | -0.63316700 | 0.48626700  |
| C | -5.36151500 | -2.60021900 | -0.83594900 |
| C | -6.33132600 | -0.37807800 | 0.53176700  |
| H | -4.26845200 | 0.03744800  | 0.99443100  |
| C | -6.73347100 | -2.35179900 | -0.79368100 |
| H | -4.98904300 | -3.47457700 | -1.36574000 |
| C | -7.22492700 | -1.23726400 | -0.10910800 |
| H | -6.70228300 | 0.48888500  | 1.07321800  |
| H | -7.42084000 | -3.03174500 | -1.29087800 |
| H | -8.29385700 | -1.04456000 | -0.07160400 |

## ADD2-O

|    |             |            |             |
|----|-------------|------------|-------------|
| Ag | -0.62821700 | 0.82621100 | 0.32142700  |
| P  | -0.43834700 | 2.43378900 | 2.05095800  |
| C  | -0.21671500 | 4.17382800 | 1.41568200  |
| H  | 0.17168000  | 4.78840500 | 2.23897000  |
| H  | -1.21490700 | 4.56372200 | 1.17753000  |
| C  | 0.71067300  | 4.26283100 | 0.18609900  |
| H  | 1.11392200  | 5.28066200 | 0.09757800  |
| H  | 1.57309800  | 3.59575800 | 0.31019800  |
| P  | -0.14015000 | 3.78672300 | -1.42549700 |
| C  | 1.03383300  | 2.22329800 | 3.15255100  |
| H  | 1.07394100  | 2.99933900 | 3.92619100  |
| H  | 0.99498300  | 1.23821100 | 3.62714900  |
| H  | 1.94842400  | 2.26284400 | 2.55310400  |
| C  | -1.81126100 | 2.63853100 | 3.27622500  |
| H  | -2.74589100 | 2.85523700 | 2.74933600  |
| H  | -1.94408600 | 1.70629300 | 3.83423600  |



|    |             |             |             |
|----|-------------|-------------|-------------|
| H  | -1.60190600 | 3.44855300  | 3.98464400  |
| C  | 1.34932800  | 3.72741800  | -2.54194100 |
| H  | 1.01697500  | 3.67466400  | -3.58426100 |
| H  | 1.99880300  | 4.60403800  | -2.42592700 |
| H  | 1.92809900  | 2.82180400  | -2.33378400 |
| C  | -0.82871700 | 5.45730300  | -1.90513300 |
| H  | -0.06218900 | 6.24244800  | -1.91804800 |
| H  | -1.27896600 | 5.39130600  | -2.90149000 |
| H  | -1.62077200 | 5.75116700  | -1.20721900 |
| N  | 2.77426300  | -1.89291100 | -0.22671200 |
| H  | 1.87115300  | -1.47677100 | -0.53453100 |
| Si | 4.13437100  | -1.12569600 | -0.99012700 |
| Si | 2.55477500  | -2.98389200 | 1.10769100  |
| C  | 4.20751000  | -3.75272000 | 1.63197500  |
| H  | 4.06141100  | -4.41554100 | 2.49450600  |
| H  | 4.64949700  | -4.35187600 | 0.82759000  |
| H  | 4.94271700  | -2.99325700 | 1.92572200  |
| C  | 1.81776100  | -2.07814000 | 2.61059800  |
| H  | 2.51491300  | -1.31917100 | 2.98837500  |
| H  | 0.89205300  | -1.56498400 | 2.31879400  |
| H  | 1.58179400  | -2.76223400 | 3.43656200  |
| C  | 1.35290600  | -4.37082400 | 0.63347000  |
| H  | 1.75522800  | -4.97732600 | -0.18686100 |
| H  | 1.14465100  | -5.03963800 | 1.47870300  |
| H  | 0.39789700  | -3.95044600 | 0.29515500  |
| C  | 5.44416600  | -2.37017700 | -1.57135000 |
| H  | 6.24695700  | -1.85916200 | -2.11919400 |
| H  | 5.90919900  | -2.90757700 | -0.73665500 |
| H  | 5.00379600  | -3.11654700 | -2.24348100 |
| C  | 3.46336200  | -0.18244600 | -2.49116000 |
| H  | 4.18357200  | 0.55343300  | -2.87059600 |
| H  | 3.22014600  | -0.86774300 | -3.31234000 |
| H  | 2.53597400  | 0.33516800  | -2.21725900 |
| C  | 5.01174000  | 0.11366100  | 0.15953000  |
| H  | 4.32320400  | 0.90942600  | 0.47300700  |
| H  | 5.37969600  | -0.37776200 | 1.06943900  |
| H  | 5.87280100  | 0.58804700  | -0.32974700 |
| C  | -0.46846900 | -1.01384000 | -2.02936000 |
| H  | -0.34396300 | -0.27344800 | -2.85272200 |
| H  | -0.14865600 | -1.98838300 | -2.44737500 |
| C  | -1.99332900 | -1.11882100 | -1.76754500 |
| H  | -2.49255400 | -1.32603800 | -2.72974300 |
| O  | 0.27060700  | -0.68346500 | -0.90989900 |
| N  | -2.45540000 | 0.16970300  | -1.20417200 |
| H  | -2.41232900 | 0.90115800  | -1.91273000 |
| H  | -3.42164200 | 0.10443400  | -0.88890200 |
| C  | -2.33003000 | -2.26373200 | -0.79194800 |
| H  | -1.94564300 | -3.19091300 | -1.23549000 |
| H  | -1.77030300 | -2.09712100 | 0.13484600  |
| C  | -3.80827900 | -2.40950800 | -0.49931700 |

|   |             |             |             |
|---|-------------|-------------|-------------|
| C | -4.37222000 | -1.88428200 | 0.67334600  |
| C | -4.66198100 | -3.04983000 | -1.41187900 |
| C | -5.74319800 | -1.98802100 | 0.92471200  |
| H | -3.72412100 | -1.40043700 | 1.40153900  |
| C | -6.03042300 | -3.15796200 | -1.16496500 |
| H | -4.24402900 | -3.47362500 | -2.32274500 |
| C | -6.57763900 | -2.62462600 | 0.00521700  |
| H | -6.15627600 | -1.57814800 | 1.84316000  |
| H | -6.67047500 | -3.66355500 | -1.88371400 |
| H | -7.64327900 | -2.71123900 | 0.20015400  |

### ADD1-N

|    |             |             |             |
|----|-------------|-------------|-------------|
| Ag | -1.37615100 | -1.10246200 | -0.18004600 |
| P  | -2.89029800 | 3.26500600  | 0.32186500  |
| C  | -4.13608000 | 2.61356500  | -0.93036000 |
| H  | -4.30372500 | 3.38301700  | -1.69773000 |
| H  | -5.08791600 | 2.49765600  | -0.39683700 |
| C  | -3.78317000 | 1.30196900  | -1.65412200 |
| H  | -4.57826400 | 1.08081500  | -2.37832400 |
| H  | -2.86039300 | 1.42485700  | -2.23197700 |
| P  | -3.56313500 | -0.25038600 | -0.62040800 |
| C  | -1.50286700 | 3.77819700  | -0.80958100 |
| H  | -1.86032100 | 4.21556500  | -1.75085800 |
| H  | -0.89358100 | 4.52817500  | -0.29194800 |
| H  | -0.84941300 | 2.92174800  | -1.00539000 |
| C  | -3.69700800 | 4.92363300  | 0.61641000  |
| H  | -4.64469500 | 4.78716300  | 1.14889800  |
| H  | -3.04618300 | 5.53296700  | 1.25251800  |
| H  | -3.89143000 | 5.47414100  | -0.31290100 |
| C  | -4.49281000 | -1.48834500 | -1.63853400 |
| H  | -4.49879000 | -2.45521100 | -1.12607700 |
| H  | -5.52622400 | -1.16632400 | -1.81287200 |
| H  | -3.99284800 | -1.62196600 | -2.60303700 |
| C  | -4.67346000 | -0.04806900 | 0.84222900  |
| H  | -5.69487400 | 0.21588800  | 0.54606600  |
| H  | -4.69712700 | -0.99494100 | 1.39099300  |
| H  | -4.27215500 | 0.72273000  | 1.50553900  |
| H  | 1.00124100  | 0.48209100  | 0.38246900  |
| N  | 0.44425500  | -2.12417700 | 0.08848800  |
| Si | 0.63849300  | -2.86970500 | 1.63935300  |
| Si | 1.18374000  | -2.62245200 | -1.39266200 |
| C  | 1.28187000  | -1.17867000 | -2.63273000 |
| H  | 0.30150700  | -0.70820100 | -2.78745200 |
| H  | 1.97112800  | -0.39758200 | -2.28851400 |
| H  | 1.64021200  | -1.52530200 | -3.61129100 |
| C  | 2.97149700  | -3.24953000 | -1.16584000 |
| H  | 3.61619400  | -2.48445400 | -0.71512500 |
| H  | 3.02472600  | -4.13982300 | -0.52744100 |
| H  | 3.40842300  | -3.51825800 | -2.13676700 |

|   |             |             |             |
|---|-------------|-------------|-------------|
| C | 0.22541900  | -4.01678800 | -2.27219300 |
| H | -0.79706100 | -3.69564400 | -2.51329900 |
| H | 0.70869800  | -4.32188500 | -3.21016300 |
| H | 0.14533800  | -4.90402200 | -1.63219400 |
| C | 0.53694800  | -4.77457000 | 1.58620800  |
| H | 0.65145200  | -5.20552000 | 2.58986200  |
| H | -0.43409400 | -5.10295700 | 1.19315100  |
| H | 1.31362700  | -5.21633900 | 0.94977600  |
| C | 2.31495900  | -2.43936800 | 2.44264200  |
| H | 2.41026000  | -2.88853400 | 3.44011700  |
| H | 3.16010800  | -2.78994000 | 1.83876300  |
| H | 2.42159900  | -1.35267300 | 2.55391200  |
| C | -0.70951600 | -2.29570400 | 2.85122200  |
| H | -0.70845700 | -1.20438500 | 2.95726500  |
| H | -1.70803000 | -2.61107000 | 2.51838000  |
| H | -0.54778400 | -2.73034000 | 3.84748000  |
| C | 0.79250600  | 2.25545300  | 2.34841100  |
| H | -0.20643600 | 2.58938500  | 2.05619300  |
| H | 1.18446600  | 2.95156400  | 3.10733800  |
| C | 1.70349800  | 2.27246200  | 1.11405900  |
| H | 1.71221200  | 3.31198900  | 0.75283700  |
| O | 0.60221700  | 0.95597600  | 2.90179400  |
| N | 1.10477100  | 1.44815600  | 0.06454800  |
| C | 3.17200400  | 1.90360200  | 1.48148900  |
| H | 3.49205900  | 2.53681500  | 2.32155100  |
| H | 3.20022500  | 0.86277300  | 1.82874800  |
| C | 4.13669100  | 2.07501100  | 0.32974000  |
| C | 4.48200400  | 0.99500900  | -0.49571400 |
| C | 4.67913700  | 3.33518700  | 0.03526700  |
| C | 5.34004300  | 1.16880900  | -1.58470000 |
| H | 4.08584100  | 0.00660100  | -0.27510900 |
| C | 5.53717600  | 3.51319400  | -1.05007900 |
| H | 4.43006300  | 4.18406400  | 0.66926200  |
| C | 5.86970100  | 2.42886200  | -1.86607900 |
| H | 5.59682300  | 0.31643000  | -2.20819800 |
| H | 5.95057200  | 4.49731400  | -1.25607700 |
| H | 6.54039000  | 2.56489100  | -2.71028700 |
| H | 1.43586900  | 0.65553500  | 3.29462400  |
| H | 1.71392700  | 1.41870900  | -0.75131100 |

#### TS1-N

|    |             |             |             |
|----|-------------|-------------|-------------|
| Ag | -1.15761100 | -0.08235300 | -0.91282400 |
| P  | -3.66807300 | -2.23141400 | 0.97005200  |
| C  | -5.00783200 | -0.93529200 | 0.70511400  |
| H  | -5.67601100 | -0.91529300 | 1.57766900  |
| H  | -5.61566200 | -1.27718900 | -0.14242300 |
| C  | -4.51357100 | 0.49921800  | 0.44236800  |
| H  | -5.37959400 | 1.16092400  | 0.30167400  |
| H  | -3.96449000 | 0.88256800  | 1.31117300  |

|    |             |             |             |
|----|-------------|-------------|-------------|
| P  | -3.39986600 | 0.73293300  | -1.03464700 |
| C  | -3.10521200 | -1.76907200 | 2.68497600  |
| H  | -3.94323800 | -1.63820300 | 3.38168800  |
| H  | -2.44864700 | -2.55683500 | 3.06891400  |
| H  | -2.51536200 | -0.84755800 | 2.65757200  |
| C  | -4.77689300 | -3.67376400 | 1.38320200  |
| H  | -5.31653900 | -3.99681000 | 0.48632000  |
| H  | -4.16076500 | -4.51471400 | 1.71860800  |
| H  | -5.50569000 | -3.43887100 | 2.16911900  |
| C  | -3.48827100 | 2.55899400  | -1.29669200 |
| H  | -2.94850400 | 2.81728000  | -2.21271800 |
| H  | -4.52621200 | 2.90201300  | -1.37748800 |
| H  | -2.99743600 | 3.07623500  | -0.46713200 |
| C  | -4.39707200 | 0.07266800  | -2.44367100 |
| H  | -5.41239600 | 0.48598200  | -2.44312300 |
| H  | -3.90496600 | 0.34092700  | -3.38378300 |
| H  | -4.44981300 | -1.01832400 | -2.38852600 |
| H  | 1.31814400  | 0.31310200  | -0.12096600 |
| N  | 1.58828100  | 1.23937500  | 0.85532600  |
| Si | 1.81948100  | 2.88711900  | 0.43208700  |
| Si | 1.25449400  | 0.65910000  | 2.43992800  |
| C  | 0.88338200  | -1.21448400 | 2.41368300  |
| H  | -0.00052100 | -1.46107800 | 1.81087100  |
| H  | 1.73108900  | -1.79158200 | 2.02346500  |
| H  | 0.69048900  | -1.57095800 | 3.43426700  |
| C  | 2.68401500  | 0.86043000  | 3.68675200  |
| H  | 3.59325400  | 0.36472700  | 3.32242100  |
| H  | 2.93575400  | 1.91176900  | 3.86602000  |
| H  | 2.42949700  | 0.41164800  | 4.65658600  |
| C  | -0.28229700 | 1.47471800  | 3.24055800  |
| H  | -1.16286200 | 1.34101200  | 2.59585100  |
| H  | -0.51638600 | 1.04525600  | 4.22420300  |
| H  | -0.14691700 | 2.55512700  | 3.37748000  |
| C  | 2.44485400  | 4.00428200  | 1.84634100  |
| H  | 2.55267300  | 5.03911800  | 1.49473100  |
| H  | 1.76058900  | 4.02210000  | 2.70349300  |
| H  | 3.42480400  | 3.67705400  | 2.21399700  |
| C  | 3.13225100  | 3.12014600  | -0.94258700 |
| H  | 3.28308200  | 4.18978000  | -1.13975700 |
| H  | 4.09678500  | 2.70288700  | -0.62732000 |
| H  | 2.89333200  | 2.66025500  | -1.91185500 |
| C  | 0.22023000  | 3.71218600  | -0.21577800 |
| H  | -0.20585000 | 3.14354800  | -1.05237700 |
| H  | -0.53405800 | 3.74371000  | 0.58245700  |
| H  | 0.38719400  | 4.74259400  | -0.55783000 |
| C  | 0.95809500  | -0.02913500 | -3.28627000 |
| H  | 0.02323500  | -0.51614200 | -3.58668100 |
| H  | 1.62447400  | -0.02170800 | -4.16294800 |
| C  | 1.60820600  | -0.84917700 | -2.15348000 |
| H  | 1.48138500  | -1.90021000 | -2.45774300 |

|   |            |             |             |
|---|------------|-------------|-------------|
| O | 0.57286500 | 1.29883700  | -2.93730000 |
| N | 0.91666500 | -0.62770500 | -0.86791200 |
| C | 3.14139400 | -0.60537700 | -2.05506500 |
| H | 3.55589700 | -0.65029300 | -3.07170000 |
| H | 3.32792200 | 0.40322300  | -1.67326200 |
| C | 3.85780000 | -1.61854600 | -1.18724800 |
| C | 4.11709300 | -1.35989100 | 0.16641700  |
| C | 4.26325800 | -2.85056400 | -1.72189400 |
| C | 4.76256000 | -2.30995100 | 0.96202700  |
| H | 3.80039100 | -0.41112000 | 0.59300900  |
| C | 4.90614600 | -3.80216400 | -0.92870200 |
| H | 4.08151900 | -3.06224700 | -2.77430100 |
| C | 5.15845700 | -3.53375300 | 0.41859500  |
| H | 4.95795700 | -2.08987800 | 2.00863900  |
| H | 5.21684900 | -4.74864100 | -1.36434300 |
| H | 5.66365500 | -4.27064400 | 1.03768000  |
| H | 1.30720700 | 1.73589300  | -2.47725200 |
| H | 1.06879000 | -1.45092800 | -0.28631500 |

#### ADD2-N

|    |             |             |             |
|----|-------------|-------------|-------------|
| Ag | 1.31446300  | -0.31490700 | -0.69540000 |
| P  | 4.42354700  | 1.25757900  | 0.62219100  |
| C  | 5.18176600  | -0.42159900 | 1.01472400  |
| H  | 5.72285200  | -0.36681600 | 1.96990900  |
| H  | 5.93680100  | -0.60865800 | 0.24020000  |
| C  | 4.20669400  | -1.61144900 | 1.07964800  |
| H  | 4.77566700  | -2.53928300 | 1.23053300  |
| H  | 3.53870800  | -1.50920800 | 1.94353900  |
| P  | 3.10628100  | -1.86598200 | -0.40447100 |
| C  | 3.48119100  | 1.57770300  | 2.19841800  |
| H  | 4.07934600  | 1.38185500  | 3.09761800  |
| H  | 3.16080400  | 2.62507000  | 2.21136700  |
| H  | 2.57394200  | 0.96539000  | 2.22895800  |
| C  | 5.93554600  | 2.30200900  | 0.94779600  |
| H  | 6.68495000  | 2.12152600  | 0.16951000  |
| H  | 5.65795800  | 3.36027200  | 0.90011800  |
| H  | 6.38778800  | 2.10184200  | 1.92732100  |
| C  | 2.54834900  | -3.61165700 | -0.16034900 |
| H  | 1.94657100  | -3.92486700 | -1.01887500 |
| H  | 3.39836700  | -4.29449900 | -0.04729700 |
| H  | 1.91714300  | -3.67363800 | 0.73166900  |
| C  | 4.28785600  | -2.00556000 | -1.81721100 |
| H  | 5.09331800  | -2.71537800 | -1.59663800 |
| H  | 3.74577400  | -2.34666800 | -2.70476000 |
| H  | 4.71708600  | -1.02440800 | -2.03879400 |
| H  | -2.02209700 | -0.50345800 | 0.02193500  |
| N  | -2.64433700 | -1.14014300 | 0.53760000  |
| Si | -3.62054600 | -2.15806800 | -0.50697800 |
| Si | -2.28684800 | -1.22049200 | 2.24621500  |

|   |             |             |             |
|---|-------------|-------------|-------------|
| C | -1.00691600 | 0.12058600  | 2.64034900  |
| H | -0.08931200 | -0.02632000 | 2.05548100  |
| H | -1.38681700 | 1.12411100  | 2.41500100  |
| H | -0.73432000 | 0.09746400  | 3.70335500  |
| C | -3.82479800 | -0.92221900 | 3.31342600  |
| H | -4.28570600 | 0.04361200  | 3.07399900  |
| H | -4.58577700 | -1.69687200 | 3.16584100  |
| H | -3.56549500 | -0.91462300 | 4.38022300  |
| C | -1.55134600 | -2.90038900 | 2.75256600  |
| H | -0.61837900 | -3.09819400 | 2.20854400  |
| H | -1.32682700 | -2.93272400 | 3.82691500  |
| H | -2.23595200 | -3.73003400 | 2.53696800  |
| C | -4.94975100 | -3.03819300 | 0.51820600  |
| H | -5.54112200 | -3.69781400 | -0.12945100 |
| H | -4.52654100 | -3.66244800 | 1.31454600  |
| H | -5.64093900 | -2.32514100 | 0.98194500  |
| C | -4.44673700 | -1.10472100 | -1.84276900 |
| H | -5.10555400 | -1.71843800 | -2.47102500 |
| H | -5.05372800 | -0.30372100 | -1.40384700 |
| H | -3.69958800 | -0.64851200 | -2.50345100 |
| C | -2.56043200 | -3.47312600 | -1.37456500 |
| H | -1.80685800 | -3.00076500 | -2.01765300 |
| H | -2.03658000 | -4.10529300 | -0.64671000 |
| H | -3.16916900 | -4.12783100 | -2.01187800 |
| C | -0.42382700 | 0.82739500  | -3.35620400 |
| H | 0.63937200  | 0.56187800  | -3.50057500 |
| H | -0.75767900 | 1.36598100  | -4.25120400 |
| C | -0.54719500 | 1.70464100  | -2.09444800 |
| H | 0.24789100  | 2.47106300  | -2.15154400 |
| O | -1.21052600 | -0.34964500 | -3.22822700 |
| N | -0.42075600 | 0.81456300  | -0.93813800 |
| C | -1.90579800 | 2.46166200  | -2.08574500 |
| H | -1.95836400 | 3.07444300  | -2.99655500 |
| H | -2.71174300 | 1.72242500  | -2.14444700 |
| C | -2.10126600 | 3.34734700  | -0.87548700 |
| C | -2.87114400 | 2.92301000  | 0.21824300  |
| C | -1.49573000 | 4.61189200  | -0.80583300 |
| C | -3.02835400 | 3.73417500  | 1.34559800  |
| H | -3.35138200 | 1.94810300  | 0.18239800  |
| C | -1.64802600 | 5.42429700  | 0.31842800  |
| H | -0.90370400 | 4.96470600  | -1.64814400 |
| C | -2.41635800 | 4.98763000  | 1.40082500  |
| H | -3.63621800 | 3.38729300  | 2.17783500  |
| H | -1.17360500 | 6.40235100  | 0.34654700  |
| H | -2.54203800 | 5.62160300  | 2.27480500  |
| H | -1.21596100 | -0.49335000 | -2.25765500 |
| H | -0.60906200 | 1.35010600  | -0.09200700 |

**ADD3-O**

|    |             |             |             |
|----|-------------|-------------|-------------|
| C  | -0.17817300 | -0.04641400 | -0.87967200 |
| H  | 0.61889600  | 0.53298000  | -0.37763100 |
| H  | 0.29320700  | -0.47137400 | -1.79559200 |
| C  | -1.23585500 | 0.97468700  | -1.35442400 |
| H  | -1.69533400 | 1.41770400  | -0.46122600 |
| O  | -0.67773800 | -1.02917000 | -0.04039200 |
| N  | -2.31944000 | 0.24034500  | -2.04492200 |
| H  | -3.09331800 | 0.86324000  | -2.26936800 |
| H  | -1.96962400 | -0.12841200 | -2.93097500 |
| C  | -0.60934500 | 2.10075900  | -2.21010600 |
| H  | 0.21935000  | 2.53538300  | -1.63620300 |
| H  | -0.16478800 | 1.65487100  | -3.11071600 |
| C  | -1.59018600 | 3.18483200  | -2.59960300 |
| C  | -2.20197400 | 3.19831100  | -3.86160500 |
| C  | -1.94311700 | 4.18968800  | -1.68453900 |
| C  | -3.13768300 | 4.17925500  | -4.20054300 |
| H  | -1.92869800 | 2.44073000  | -4.59356400 |
| C  | -2.87621200 | 5.17149200  | -2.01783900 |
| H  | -1.47347200 | 4.20303900  | -0.70307700 |
| C  | -3.47932700 | 5.16938500  | -3.27858100 |
| H  | -3.12836100 | 5.94338600  | -1.29496700 |
| H  | -4.20311300 | 5.93650500  | -3.54099700 |
| Ag | -2.68536100 | -1.61849600 | -0.45598300 |
| P  | -4.58727900 | -2.98317400 | -0.08334000 |
| C  | -5.66911200 | -2.38079300 | 1.31473900  |
| H  | -6.24806100 | -3.23527100 | 1.69025400  |
| H  | -6.39309400 | -1.67510200 | 0.88705600  |
| C  | -4.86981700 | -1.71149000 | 2.45135300  |
| H  | -5.46342100 | -1.71057200 | 3.37525500  |
| H  | -3.95788800 | -2.28307000 | 2.66562700  |
| P  | -4.35216400 | 0.05158800  | 2.02299400  |
| C  | 6.51496300  | -4.51030700 | -1.56875800 |
| C  | 5.35834700  | -3.73306700 | -1.63296200 |
| C  | 5.23865800  | -2.62655800 | -0.78924700 |
| C  | 6.25260700  | -2.27835000 | 0.10561100  |
| C  | 7.40419300  | -3.06496400 | 0.16235000  |
| C  | 7.53329700  | -4.17919200 | -0.67049500 |
| H  | 6.62405300  | -5.37037900 | -2.22349600 |
| H  | 4.56346000  | -3.96220800 | -2.33504900 |
| H  | 6.14383000  | -1.39541200 | 0.72684100  |
| H  | 8.20270100  | -2.80266500 | 0.85068000  |
| H  | 8.43278800  | -4.78717400 | -0.62466800 |
| S  | 3.73953000  | -1.62975000 | -0.85796600 |
| O  | 4.10737600  | -0.27945400 | -0.37397300 |
| O  | 3.13962800  | -1.80905300 | -2.19088700 |
| C  | 2.67630400  | -2.35738300 | 0.36518600  |
| H  | 3.06607000  | -2.30191200 | 1.37715000  |
| C  | 1.45988600  | -2.79049300 | 0.03546200  |

|    |             |             |             |
|----|-------------|-------------|-------------|
| H  | 1.11779600  | -2.78698400 | -0.99233400 |
| H  | 0.77287700  | -3.15647600 | 0.78895800  |
| C  | -5.81128500 | -3.23664000 | -1.44956200 |
| C  | -4.22352100 | -4.72716200 | 0.42639300  |
| C  | -5.77729000 | 0.97518800  | 2.80703700  |
| C  | -3.04220900 | 0.31830900  | 3.31660600  |
| H  | -5.59682600 | 2.05278900  | 2.73011700  |
| H  | -6.70464600 | 0.75931700  | 2.26436000  |
| H  | -5.92001700 | 0.71744200  | 3.86418400  |
| H  | -2.78397500 | 1.38210200  | 3.35176400  |
| H  | -3.36020200 | 0.00042500  | 4.31759300  |
| H  | -2.13856100 | -0.22793700 | 3.02812400  |
| H  | -5.32211600 | -3.73876400 | -2.29030200 |
| H  | -6.66395800 | -3.84262100 | -1.12160600 |
| H  | -6.17499400 | -2.26553100 | -1.79954700 |
| H  | -3.63165900 | -4.72276800 | 1.34695000  |
| H  | -5.14295000 | -5.30097600 | 0.59280000  |
| H  | -3.62916800 | -5.21787900 | -0.35058900 |
| H  | -3.59302000 | 4.17253100  | -5.18785500 |
| H  | 2.88412300  | 1.18299100  | 0.79746000  |
| N  | 2.74875300  | 2.08837300  | 1.25014900  |
| Si | 1.73241500  | 2.01630800  | 2.66992300  |
| Si | 3.81750800  | 3.29605700  | 0.56667100  |
| C  | 5.62248600  | 2.96759300  | 1.05063700  |
| H  | 6.30931700  | 3.69497500  | 0.59829500  |
| H  | 5.75765100  | 3.00924000  | 2.13852900  |
| H  | 5.92456100  | 1.96819000  | 0.71448600  |
| C  | 3.68887800  | 3.24116500  | -1.31958400 |
| H  | 4.41387600  | 3.91435000  | -1.79503600 |
| H  | 3.88257700  | 2.22559500  | -1.68428900 |
| H  | 2.68748100  | 3.53298400  | -1.65907200 |
| C  | 3.31770500  | 5.01713400  | 1.18542400  |
| H  | 3.37997700  | 5.10726600  | 2.27643400  |
| H  | 3.98364700  | 5.77784800  | 0.75856800  |
| H  | 2.29398700  | 5.27001800  | 0.88503000  |
| C  | 2.65915700  | 2.57000200  | 4.23316300  |
| H  | 3.53600500  | 1.93617500  | 4.41379400  |
| H  | 3.01239200  | 3.60566700  | 4.15819200  |
| H  | 2.01367800  | 2.50890800  | 5.11926800  |
| C  | 0.20120300  | 3.12647600  | 2.49178800  |
| H  | -0.42425200 | 3.08707500  | 3.39366600  |
| H  | 0.47328600  | 4.17582100  | 2.32567000  |
| H  | -0.41305000 | 2.80089800  | 1.64312800  |
| C  | 1.16480600  | 0.22609700  | 2.90002500  |
| H  | 0.51880200  | 0.14692500  | 3.78474900  |
| H  | 0.59999300  | -0.15136500 | 2.03698800  |
| H  | 2.02077900  | -0.44147400 | 3.06360500  |



**TS2-O**

|    |             |             |             |
|----|-------------|-------------|-------------|
| C  | -0.11673800 | 0.10171800  | -1.14448300 |
| H  | 0.90481300  | 0.33401400  | -0.80797000 |
| H  | -0.02209100 | -0.31904300 | -2.16356700 |
| C  | -0.90643100 | 1.41287200  | -1.22689300 |
| H  | -0.99178100 | 1.82884800  | -0.21560800 |
| O  | -0.72992900 | -0.80914300 | -0.27081700 |
| N  | -2.29674400 | 1.11228100  | -1.66412600 |
| H  | -2.84971500 | 1.96866400  | -1.67806100 |
| H  | -2.27514700 | 0.77263100  | -2.62725800 |
| C  | -0.19966500 | 2.44460400  | -2.13789300 |
| H  | 0.81375300  | 2.59812900  | -1.74727800 |
| H  | -0.08402500 | 2.00947500  | -3.13996300 |
| C  | -0.92888800 | 3.76856300  | -2.23188900 |
| C  | -1.74177000 | 4.07393000  | -3.33356200 |
| C  | -0.83552400 | 4.71273400  | -1.19668200 |
| C  | -2.44379500 | 5.28031700  | -3.40103500 |
| H  | -1.81017400 | 3.36623300  | -4.15761300 |
| C  | -1.53432800 | 5.91857500  | -1.25988100 |
| H  | -0.19952400 | 4.50435000  | -0.33924200 |
| C  | -2.34343900 | 6.20657300  | -2.36224900 |
| H  | -1.44033500 | 6.63825300  | -0.45065500 |
| H  | -2.88358700 | 7.14815200  | -2.41380900 |
| Ag | -3.02339000 | -0.65817400 | -0.28949500 |
| P  | -4.71921800 | -2.45219800 | -0.34087200 |
| C  | -5.67792700 | -2.21994700 | 1.25049500  |
| H  | -6.24957300 | -3.13119400 | 1.47098600  |
| H  | -6.41115300 | -1.42431600 | 1.06351300  |
| C  | -4.78452500 | -1.84564300 | 2.44984700  |
| H  | -5.38918300 | -1.79149800 | 3.36471200  |
| H  | -4.03153200 | -2.62705000 | 2.61564000  |
| P  | -3.85024100 | -0.23620200 | 2.20346400  |
| C  | 4.40698700  | -5.68923300 | -1.74923600 |
| C  | 3.61020500  | -4.54503500 | -1.80489100 |
| C  | 3.82435100  | -3.51402900 | -0.88743200 |
| C  | 4.83261300  | -3.61147800 | 0.07456800  |
| C  | 5.62179700  | -4.76151400 | 0.12675400  |
| C  | 5.40905600  | -5.80167900 | -0.78161000 |
| H  | 4.25033000  | -6.49115400 | -2.46638400 |
| H  | 2.83979400  | -4.43082200 | -2.56042000 |
| H  | 5.00548500  | -2.78408700 | 0.75505400  |
| H  | 6.41035300  | -4.84065400 | 0.87081100  |
| H  | 6.02893600  | -6.69371900 | -0.74155400 |
| S  | 2.76309000  | -2.04576500 | -0.93854700 |
| O  | 3.65588700  | -0.94310800 | -0.47350500 |
| O  | 2.21074400  | -1.99112200 | -2.31405800 |
| C  | 1.49577700  | -2.30487100 | 0.18876100  |
| H  | 1.79556000  | -2.21877600 | 1.22718000  |
| C  | 0.16607500  | -2.36445000 | -0.22306500 |

|    |             |             |             |
|----|-------------|-------------|-------------|
| H  | -0.01411200 | -2.64145800 | -1.25981200 |
| H  | -0.54607600 | -2.78784800 | 0.48413100  |
| C  | -6.08527800 | -2.60732500 | -1.58370300 |
| C  | -4.12901900 | -4.20366700 | -0.20361200 |
| C  | -5.11638000 | 1.01076500  | 2.75170200  |
| C  | -2.69898900 | -0.26400600 | 3.65536600  |
| H  | -4.66180400 | 2.00680100  | 2.76049400  |
| H  | -5.95064200 | 1.03328300  | 2.04279300  |
| H  | -5.50565600 | 0.79118800  | 3.75325600  |
| H  | -2.19546700 | 0.70464500  | 3.73302800  |
| H  | -3.22005600 | -0.47152900 | 4.59765900  |
| H  | -1.92677400 | -1.02178100 | 3.49198600  |
| H  | -5.65992700 | -2.87805300 | -2.55528100 |
| H  | -6.81940600 | -3.36878300 | -1.29466700 |
| H  | -6.59387500 | -1.64441800 | -1.69472000 |
| H  | -3.39883600 | -4.28777800 | 0.60716600  |
| H  | -4.95605500 | -4.89915300 | -0.01714500 |
| H  | -3.62451000 | -4.48867300 | -1.13217200 |
| H  | -3.06093900 | 5.49787400  | -4.26911500 |
| H  | 3.27890400  | 0.66635100  | 0.79020500  |
| N  | 3.45877200  | 1.59862100  | 1.17660200  |
| Si | 2.52928300  | 1.97473200  | 2.59764200  |
| Si | 4.72106600  | 2.39280300  | 0.25720400  |
| C  | 6.30166800  | 1.35244700  | 0.28190100  |
| H  | 7.08880700  | 1.78568000  | -0.34883700 |
| H  | 6.69964600  | 1.25477400  | 1.29951900  |
| H  | 6.08234900  | 0.34587300  | -0.09274900 |
| C  | 4.17511500  | 2.60221800  | -1.54447600 |
| H  | 4.97758800  | 3.01233100  | -2.17140100 |
| H  | 3.88681500  | 1.62956100  | -1.96048000 |
| H  | 3.31227500  | 3.27588400  | -1.62475800 |
| C  | 5.07934600  | 4.10257400  | 0.99881100  |
| H  | 5.47905100  | 4.03453200  | 2.01728900  |
| H  | 5.82859700  | 4.62311700  | 0.38873800  |
| H  | 4.18631600  | 4.73871300  | 1.02880100  |
| C  | 3.61203500  | 2.41459200  | 4.09348300  |
| H  | 4.30899100  | 1.60017300  | 4.32532100  |
| H  | 4.20686400  | 3.31904900  | 3.91987500  |
| H  | 2.99747500  | 2.59372200  | 4.98576700  |
| C  | 1.34821100  | 3.43687400  | 2.30585500  |
| H  | 0.78835100  | 3.69741400  | 3.21385500  |
| H  | 1.88949800  | 4.33489200  | 1.98338100  |
| H  | 0.62141700  | 3.18822200  | 1.52182000  |
| C  | 1.48783600  | 0.45264200  | 3.03299000  |
| H  | 0.82168900  | 0.66623900  | 3.87959200  |
| H  | 0.87163200  | 0.12793600  | 2.18554300  |
| H  | 2.12551800  | -0.39238200 | 3.32078000  |

**ADD4-O**

|    |             |             |             |
|----|-------------|-------------|-------------|
| C  | 0.03341700  | -0.38819100 | -0.56587300 |
| H  | -0.96129500 | -0.34282200 | -0.10841600 |
| H  | -0.07677100 | -0.04058500 | -1.60638300 |
| C  | 0.54910900  | -1.82443000 | -0.53824300 |
| H  | 0.70600100  | -2.11206700 | 0.50830600  |
| O  | 0.93510000  | 0.44137500  | 0.15035200  |
| N  | 1.89426200  | -1.88190100 | -1.18200500 |
| H  | 2.26148900  | -2.83147000 | -1.12045800 |
| H  | 1.78994300  | -1.68740800 | -2.17939400 |
| C  | -0.46113900 | -2.80182600 | -1.18288800 |
| H  | -1.41794400 | -2.68586900 | -0.65989200 |
| H  | -0.63694000 | -2.49473200 | -2.22279100 |
| C  | -0.00546800 | -4.24544600 | -1.13895900 |
| C  | 0.58919500  | -4.85496400 | -2.25373900 |
| C  | -0.13651300 | -5.00074500 | 0.03719300  |
| C  | 1.04406400  | -6.17516600 | -2.19747000 |
| H  | 0.67684700  | -4.29625200 | -3.18373300 |
| C  | 0.31575700  | -6.31901700 | 0.09806400  |
| H  | -0.61328500 | -4.55449900 | 0.90708100  |
| C  | 0.91072700  | -6.91086100 | -1.01934300 |
| H  | 0.19483500  | -6.88817100 | 1.01613600  |
| H  | 1.25795800  | -7.93956400 | -0.97397100 |
| Ag | 3.19968100  | -0.21072900 | -0.23899000 |
| P  | 4.84960400  | 1.50985000  | -1.03313200 |
| C  | 6.08020200  | 1.56691300  | 0.37940300  |
| H  | 6.67536700  | 2.48692500  | 0.31055200  |
| H  | 6.77432600  | 0.72997100  | 0.22669300  |
| C  | 5.42326900  | 1.46364400  | 1.77062500  |
| H  | 6.18736400  | 1.55062900  | 2.55415600  |
| H  | 4.72405300  | 2.29669100  | 1.91835400  |
| P  | 4.44086200  | -0.11532400 | 2.01457000  |
| C  | -2.01355300 | 6.45524600  | -1.39629800 |
| C  | -1.83886000 | 5.07008800  | -1.38128000 |
| C  | -2.41269500 | 4.31069900  | -0.35823300 |
| C  | -3.16871300 | 4.93080900  | 0.64127000  |
| C  | -3.33774700 | 6.31558100  | 0.62177600  |
| C  | -2.75820600 | 7.08169200  | -0.39376400 |
| H  | -1.57638000 | 7.04555000  | -2.19837300 |
| H  | -1.28593300 | 4.56424700  | -2.16613300 |
| H  | -3.63626200 | 4.32312800  | 1.40938800  |
| H  | -3.93191600 | 6.79703700  | 1.39483600  |
| H  | -2.89609500 | 8.15996100  | -0.40949200 |
| S  | -2.11735800 | 2.51457400  | -0.29045800 |
| O  | -3.39767900 | 2.00104200  | 0.28939500  |
| O  | -1.76041400 | 2.15026300  | -1.69136100 |
| C  | -0.82838400 | 2.17169400  | 0.73789300  |
| H  | -1.05632100 | 2.20101300  | 1.79677400  |
| C  | 0.49538100  | 1.92604800  | 0.22410900  |

|    |             |             |             |
|----|-------------|-------------|-------------|
| H  | 0.62922700  | 2.28997300  | -0.80005600 |
| H  | 1.30299000  | 2.29875100  | 0.86839900  |
| C  | 5.97688800  | 1.40836100  | -2.50106500 |
| C  | 4.25322300  | 3.26114600  | -1.12522400 |
| C  | 5.75942600  | -1.30725700 | 2.55235400  |
| C  | 3.56000600  | 0.23213300  | 3.60540400  |
| H  | 5.29739200  | -2.26248300 | 2.82165100  |
| H  | 6.45403100  | -1.49478900 | 1.72715400  |
| H  | 6.32321800  | -0.93058100 | 3.41411100  |
| H  | 3.06100500  | -0.68048300 | 3.94643800  |
| H  | 4.24324900  | 0.57872900  | 4.38962400  |
| H  | 2.78792000  | 0.98879900  | 3.43594700  |
| H  | 5.38535000  | 1.50202500  | -3.41728200 |
| H  | 6.73703200  | 2.19840100  | -2.48975300 |
| H  | 6.47500300  | 0.43379100  | -2.51871000 |
| H  | 3.64894800  | 3.49742800  | -0.24426700 |
| H  | 5.08497800  | 3.97197400  | -1.19604700 |
| H  | 3.60933700  | 3.37593800  | -2.00286400 |
| H  | 1.49344900  | -6.62916700 | -3.07698600 |
| H  | -3.69477200 | 0.05706800  | 0.46870600  |
| N  | -4.06758500 | -0.90265500 | 0.47328100  |
| Si | -4.19516900 | -1.52202300 | 2.09826600  |
| Si | -4.99510200 | -1.17563900 | -0.98785700 |
| C  | -6.45685800 | 0.02524900  | -1.10474000 |
| H  | -6.99764900 | -0.06912700 | -2.05556500 |
| H  | -7.17455900 | -0.13871600 | -0.29133000 |
| C  | -3.88078100 | -0.90828800 | -2.49501500 |
| H  | -4.46074100 | -0.90627900 | -3.42720200 |
| H  | -3.35167800 | 0.04992200  | -2.42354000 |
| H  | -3.12766500 | -1.70253200 | -2.57406200 |
| C  | -5.64523100 | -2.95945300 | -1.00068400 |
| H  | -6.31703300 | -3.16456700 | -0.15815200 |
| H  | -6.21076200 | -3.15248400 | -1.92125900 |
| H  | -4.82541700 | -3.68701200 | -0.95931000 |
| C  | -5.97135000 | -1.51861800 | 2.77508500  |
| H  | -6.38769700 | -0.50395100 | 2.77008200  |
| H  | -6.63927800 | -2.15055300 | 2.17627700  |
| H  | -6.00750900 | -1.89061000 | 3.80773200  |
| C  | -3.55734700 | -3.30935800 | 2.19911400  |
| H  | -3.65481800 | -3.71134200 | 3.21607400  |
| H  | -4.10772100 | -3.97686900 | 1.52551400  |
| H  | -2.49708400 | -3.35825100 | 1.91976400  |
| C  | -3.12503500 | -0.42037200 | 3.20580600  |
| H  | -3.14805700 | -0.75429000 | 4.25097100  |
| H  | -2.08075800 | -0.41536500 | 2.87050200  |
| H  | -3.47606600 | 0.61756100  | 3.17126100  |
| H  | -6.09289700 | 1.05646000  | -1.02217800 |

**TS3-O**

|    |             |             |             |
|----|-------------|-------------|-------------|
| C  | 0.21523000  | 0.64532600  | -1.40961100 |
| H  | 0.93883700  | 1.41495900  | -1.13421500 |
| H  | 0.51330700  | 0.22134000  | -2.38272100 |
| C  | -1.17308900 | 1.26521900  | -1.48685700 |
| H  | -1.43303700 | 1.61917800  | -0.48367800 |
| O  | 0.19713600  | -0.37757700 | -0.41580400 |
| N  | -2.17377200 | 0.21468100  | -1.83725200 |
| H  | -3.10093400 | 0.63879000  | -1.87880600 |
| H  | -1.98019300 | -0.12472000 | -2.78120600 |
| C  | -1.20622700 | 2.45894800  | -2.46629900 |
| H  | -0.42548700 | 3.16451200  | -2.16010300 |
| H  | -0.93638300 | 2.10837900  | -3.47218000 |
| C  | -2.55250600 | 3.15251000  | -2.50003700 |
| C  | -3.45703000 | 2.93920800  | -3.54997200 |
| C  | -2.93822200 | 4.00214800  | -1.45044400 |
| C  | -4.71284800 | 3.55321300  | -3.55449400 |
| H  | -3.16745000 | 2.30184600  | -4.38352700 |
| C  | -4.19054300 | 4.61638300  | -1.45154900 |
| H  | -2.24606500 | 4.18901700  | -0.63228500 |
| C  | -5.08354700 | 4.39258500  | -2.50349500 |
| H  | -4.46620700 | 5.27732800  | -0.63407100 |
| H  | -6.05672700 | 4.87607900  | -2.50665700 |
| Ag | -2.02662600 | -1.50525900 | -0.31030300 |
| P  | -1.82992800 | -4.02624000 | -0.27063500 |
| C  | -3.05527000 | -4.49403200 | 1.06735200  |
| H  | -2.86157400 | -5.52423200 | 1.39407700  |
| H  | -4.04849100 | -4.49439700 | 0.59965900  |
| C  | -3.04250500 | -3.54474400 | 2.28312300  |
| H  | -3.76795300 | -3.88891900 | 3.03179300  |
| H  | -2.05731900 | -3.56487500 | 2.76638300  |
| P  | -3.38085800 | -1.75388300 | 1.84856800  |
| C  | 5.00083500  | -3.52789500 | -2.36591100 |
| C  | 4.40138700  | -2.27478600 | -2.21337600 |
| C  | 4.70249300  | -1.50235300 | -1.08956500 |
| C  | 5.60872900  | -1.96039100 | -0.12837300 |
| C  | 6.20210700  | -3.21256400 | -0.28749400 |
| C  | 5.89533700  | -3.99910900 | -1.40266500 |
| H  | 4.77911400  | -4.12969300 | -3.24383500 |
| H  | 3.72939300  | -1.87388300 | -2.96524900 |
| H  | 5.85841800  | -1.32736700 | 0.71766600  |
| H  | 6.91318500  | -3.57087400 | 0.45232600  |
| H  | 6.36383100  | -4.97222200 | -1.52553400 |
| S  | 3.89781100  | 0.11166600  | -0.85773800 |
| O  | 4.91890500  | 0.98096300  | -0.24211100 |
| O  | 3.31797400  | 0.45403000  | -2.17983600 |
| C  | 2.57933900  | -0.12089700 | 0.30097100  |
| H  | 3.04448000  | -0.51574700 | 1.20837000  |
| C  | 1.47527700  | -1.03199300 | -0.21054900 |

|    |             |             |             |
|----|-------------|-------------|-------------|
| H  | 1.73703000  | -1.53853000 | -1.15167600 |
| H  | 1.24650000  | -1.79990800 | 0.53292300  |
| C  | -2.26766700 | -5.22811500 | -1.61146800 |
| C  | -0.24299300 | -4.72945100 | 0.37661300  |
| C  | -5.22847700 | -1.72946500 | 1.68226500  |
| C  | -3.12329500 | -0.90839000 | 3.47119400  |
| H  | -5.56240300 | -0.69691100 | 1.53748500  |
| H  | -5.53951500 | -2.30670000 | 0.80567600  |
| H  | -5.72106700 | -2.13777400 | 2.57260200  |
| H  | -3.38734600 | 0.14884700  | 3.37236000  |
| H  | -3.72925400 | -1.36034300 | 4.26527900  |
| H  | -2.06552500 | -0.95549400 | 3.74384600  |
| H  | -1.52843000 | -5.15629000 | -2.41547800 |
| H  | -2.29077700 | -6.26065100 | -1.24373100 |
| H  | -3.24735800 | -4.97583400 | -2.02962700 |
| H  | 0.06864200  | -4.18932700 | 1.27584200  |
| H  | -0.34162700 | -5.79489300 | 0.61562500  |
| H  | 0.54312100  | -4.60321000 | -0.37415000 |
| H  | -5.39505300 | 3.38103300  | -4.38306900 |
| H  | 2.12199000  | 1.06236700  | 0.73499900  |
| N  | 1.57901700  | 2.21646600  | 1.35617800  |
| Si | 0.73301800  | 1.89049400  | 2.80101300  |
| Si | 2.32006500  | 3.71573300  | 0.93714900  |
| C  | 4.06124800  | 3.92942600  | 1.67461100  |
| H  | 4.51528400  | 4.88899500  | 1.39139500  |
| H  | 4.03729300  | 3.88161700  | 2.77098500  |
| H  | 4.71548400  | 3.12604600  | 1.31676100  |
| C  | 2.49595300  | 3.90696700  | -0.95176300 |
| H  | 3.10270500  | 4.79107600  | -1.18965000 |
| H  | 2.97715800  | 3.04401000  | -1.42417400 |
| H  | 1.51836500  | 4.05294800  | -1.43279900 |
| C  | 1.29511800  | 5.24110700  | 1.48065500  |
| H  | 1.18106400  | 5.31010100  | 2.56978300  |
| H  | 1.77685300  | 6.16995500  | 1.14549000  |
| H  | 0.28625000  | 5.22079300  | 1.04619200  |
| C  | 1.46488600  | 2.64385600  | 4.39899000  |
| H  | 2.49431700  | 2.29723400  | 4.55516900  |
| H  | 1.49462500  | 3.73971100  | 4.36546900  |
| H  | 0.87900800  | 2.35881700  | 5.28414300  |
| C  | -1.10324900 | 2.44647400  | 2.76700000  |
| H  | -1.63127500 | 2.19432800  | 3.69803600  |
| H  | -1.18830500 | 3.53109800  | 2.62504100  |
| H  | -1.63559700 | 1.96482300  | 1.93432500  |
| C  | 0.65585700  | 0.00744000  | 3.15768500  |
| H  | 0.13418300  | -0.17728500 | 4.10725600  |
| H  | 0.12229900  | -0.52446700 | 2.35982100  |
| H  | 1.65690000  | -0.43257500 | 3.24671600  |

**ADD5-O**

|    |             |             |             |
|----|-------------|-------------|-------------|
| C  | 1.19078700  | 0.31881900  | -1.56099600 |
| H  | 1.88750300  | -0.43307900 | -1.14958600 |
| H  | 1.29068700  | 0.37497300  | -2.65803000 |
| C  | 1.53630700  | 1.65261000  | -0.91852200 |
| H  | 1.49261100  | 1.52234400  | 0.16698500  |
| O  | -0.17171900 | -0.02480000 | -1.24226700 |
| N  | 0.50704200  | 2.68138900  | -1.25135400 |
| H  | 0.78368100  | 3.57081400  | -0.83340800 |
| H  | 0.50002300  | 2.83748400  | -2.26086300 |
| C  | 2.97246100  | 2.07261100  | -1.30392400 |
| H  | 3.62949200  | 1.23509300  | -1.03949700 |
| H  | 3.03000300  | 2.19914400  | -2.39434900 |
| C  | 3.42076700  | 3.34080100  | -0.60880900 |
| C  | 3.32096000  | 4.59086700  | -1.23807900 |
| C  | 3.91346900  | 3.29450400  | 0.70542500  |
| C  | 3.69312400  | 5.76367900  | -0.57473800 |
| H  | 2.97136900  | 4.64450600  | -2.26778400 |
| C  | 4.28669500  | 4.46307800  | 1.36975900  |
| H  | 4.01613500  | 2.33271100  | 1.20205300  |
| C  | 4.17455600  | 5.70256600  | 0.73346000  |
| H  | 4.67502700  | 4.40415700  | 2.38312600  |
| H  | 4.47117700  | 6.61144600  | 1.25013900  |
| Ag | -1.54437100 | 1.93525300  | -0.52631500 |
| P  | -3.97018900 | 2.14395300  | -1.10179600 |
| C  | -4.73690800 | 2.43635700  | 0.58224000  |
| H  | -5.82623800 | 2.31718100  | 0.51278500  |
| H  | -4.55100600 | 3.48942700  | 0.83142000  |
| C  | -4.17389300 | 1.52236700  | 1.68977600  |
| H  | -4.68866100 | 1.72773400  | 2.63737500  |
| H  | -4.37240800 | 0.47043600  | 1.44674300  |
| P  | -2.31888500 | 1.67483200  | 1.92660400  |
| C  | -4.72969400 | -3.43179300 | -0.76713300 |
| C  | -3.36919700 | -3.62811400 | -1.02121000 |
| C  | -2.47762400 | -3.68606800 | 0.05107800  |
| C  | -2.92445100 | -3.57622400 | 1.37094400  |
| C  | -4.28466000 | -3.37759900 | 1.61562300  |
| C  | -5.18517200 | -3.29971600 | 0.54768600  |
| H  | -5.43445800 | -3.40161500 | -1.59388100 |
| H  | -2.99590700 | -3.76306700 | -2.03143600 |
| H  | -2.21551000 | -3.67855300 | 2.18713600  |
| H  | -4.64511300 | -3.30678800 | 2.63839500  |
| H  | -6.24522500 | -3.15955100 | 0.74255900  |
| S  | -0.70569100 | -3.92149100 | -0.26640200 |
| O  | -0.16940800 | -4.66551100 | 0.88309800  |
| O  | -0.58409200 | -4.43157600 | -1.64473100 |
| C  | -0.04212800 | -2.23942800 | -0.21847100 |
| H  | -0.40320100 | -1.79740900 | 0.71535700  |
| C  | -0.48600400 | -1.40755100 | -1.42506400 |

|    |             |             |             |
|----|-------------|-------------|-------------|
| H  | -0.01728800 | -1.78667300 | -2.33970800 |
| H  | -1.57274400 | -1.44354400 | -1.55540800 |
| C  | -4.72767600 | 3.50782000  | -2.10010000 |
| C  | -4.88371600 | 0.65654700  | -1.72106700 |
| C  | -2.17238000 | 3.13236000  | 3.06301500  |
| C  | -1.96737900 | 0.25419300  | 3.05755000  |
| H  | -1.12488200 | 3.25019000  | 3.35850000  |
| H  | -2.47874500 | 4.04760100  | 2.54632300  |
| H  | -2.78299600 | 3.00883200  | 3.96513700  |
| H  | -0.90163000 | 0.24252400  | 3.30550100  |
| H  | -2.55454500 | 0.31581300  | 3.98127700  |
| H  | -2.20398200 | -0.68508900 | 2.54733100  |
| H  | -4.45795300 | 3.37842400  | -3.15297000 |
| H  | -5.82048300 | 3.51735800  | -2.01327100 |
| H  | -4.33433800 | 4.47319900  | -1.76637000 |
| H  | -4.62671100 | -0.22709500 | -1.12871000 |
| H  | -5.96893400 | 0.80857500  | -1.68520400 |
| H  | -4.58770800 | 0.45965300  | -2.75650000 |
| H  | 3.61663200  | 6.72064200  | -1.08478000 |
| H  | 1.06601400  | -2.31505000 | -0.14975500 |
| N  | 3.14084700  | -1.66598900 | 0.04031800  |
| Si | 3.35133500  | -1.49395900 | 1.70543500  |
| Si | 4.07310100  | -2.48338800 | -1.11585900 |
| C  | 4.79204200  | -4.17064700 | -0.56816800 |
| H  | 5.33156000  | -4.67075000 | -1.38445800 |
| H  | 5.49524400  | -4.05393500 | 0.26741300  |
| H  | 3.99581100  | -4.84617300 | -0.23082400 |
| C  | 3.03716900  | -2.86111300 | -2.68454500 |
| H  | 3.63482900  | -3.39331000 | -3.43698200 |
| H  | 2.16789100  | -3.49171300 | -2.45500500 |
| H  | 2.66628300  | -1.94260700 | -3.16191200 |
| C  | 5.57816900  | -1.47767400 | -1.75360200 |
| H  | 6.26397600  | -1.23224400 | -0.93207500 |
| H  | 6.15326600  | -2.02559500 | -2.51317200 |
| H  | 5.26151600  | -0.52689000 | -2.20518000 |
| C  | 3.10209200  | -3.09205100 | 2.72755800  |
| H  | 2.13788900  | -3.56276800 | 2.49622600  |
| H  | 3.87908000  | -3.82937400 | 2.48909000  |
| H  | 3.14155000  | -2.90934900 | 3.81092100  |
| C  | 5.04196500  | -0.78459600 | 2.27395700  |
| H  | 5.08283100  | -0.62825000 | 3.36128400  |
| H  | 5.86230100  | -1.46546900 | 2.01100400  |
| H  | 5.26138800  | 0.17763200  | 1.79054700  |
| C  | 2.06502300  | -0.25814000 | 2.44590800  |
| H  | 2.08935600  | -0.27340500 | 3.54447300  |
| H  | 2.25738500  | 0.77621800  | 2.12866400  |
| H  | 1.04695700  | -0.52015500 | 2.12755000  |



**ADD3'-O**

|    |             |             |             |
|----|-------------|-------------|-------------|
| C  | 1.81434300  | 1.90941100  | -1.11513000 |
| H  | 1.65124300  | 2.18427300  | -2.17614600 |
| H  | 2.06262400  | 2.86114800  | -0.59187900 |
| C  | 3.08717000  | 1.03396500  | -1.07624400 |
| H  | 2.87033700  | 0.10329100  | -1.61663700 |
| O  | 0.69276600  | 1.29799900  | -0.58013600 |
| N  | 3.33998600  | 0.64100300  | 0.32480000  |
| H  | 4.11884700  | -0.01235800 | 0.38397700  |
| H  | 3.59828000  | 1.46302900  | 0.87305300  |
| C  | 4.29006400  | 1.73855500  | -1.74882700 |
| H  | 3.99242500  | 2.01600700  | -2.76891200 |
| H  | 4.49172800  | 2.67759400  | -1.21464600 |
| C  | 5.54446300  | 0.89334600  | -1.79392100 |
| C  | 6.55977300  | 1.04581900  | -0.83840000 |
| C  | 5.70451600  | -0.09809200 | -2.77479400 |
| C  | 7.69694600  | 0.23416700  | -0.85711200 |
| H  | 6.46541900  | 1.82049500  | -0.08006300 |
| C  | 6.83813600  | -0.91073600 | -2.79871200 |
| H  | 4.93298600  | -0.22774900 | -3.53103500 |
| C  | 7.83932200  | -0.74872600 | -1.83735200 |
| H  | 6.94329800  | -1.66735300 | -3.57216100 |
| H  | 8.72474500  | -1.37845000 | -1.85748200 |
| Ag | 1.08493400  | -0.11074500 | 1.03587000  |
| P  | 0.49472800  | -1.51967300 | 2.86841900  |
| C  | 1.03779600  | -3.29520200 | 2.69716200  |
| H  | 0.62120800  | -3.84775200 | 3.55086600  |
| H  | 2.12867700  | -3.30718400 | 2.82067800  |
| C  | 0.63448200  | -3.98386300 | 1.37893000  |
| H  | 0.79657900  | -5.06602500 | 1.48223500  |
| H  | -0.43629900 | -3.84528600 | 1.18423400  |
| P  | 1.56504200  | -3.36943800 | -0.13591100 |
| C  | -6.58437800 | -1.78913900 | -2.69115000 |
| C  | -5.25280100 | -2.12108800 | -2.44299800 |
| C  | -4.80375200 | -2.16798000 | -1.12092000 |
| C  | -5.65632800 | -1.89877200 | -0.04850500 |
| C  | -6.98648400 | -1.56735800 | -0.31037200 |
| C  | -7.44749200 | -1.50961900 | -1.62776500 |
| H  | -6.94914900 | -1.75271900 | -3.71365200 |
| H  | -4.57130400 | -2.35638900 | -3.25376000 |
| H  | -5.28338700 | -1.96895900 | 0.96782700  |
| H  | -7.66240100 | -1.35906000 | 0.51405300  |
| H  | -8.48376800 | -1.25079300 | -1.82691100 |
| S  | -3.08193400 | -2.57124400 | -0.79507800 |
| O  | -3.00283200 | -3.06215500 | 0.60059800  |
| O  | -2.59806700 | -3.41678200 | -1.90327700 |
| C  | -2.21939100 | -1.01455500 | -0.83856000 |
| H  | -2.47971900 | -0.33947900 | -0.02809700 |
| C  | -1.25661400 | -0.78480300 | -1.73011100 |

|    |             |             |             |
|----|-------------|-------------|-------------|
| H  | -1.03756100 | -1.51728700 | -2.50302800 |
| H  | -0.63677800 | 0.11216300  | -1.64635900 |
| C  | 1.24788800  | -1.06376500 | 4.49785800  |
| C  | -1.29346700 | -1.68583500 | 3.30316900  |
| C  | 3.21350600  | -4.20319500 | 0.14830500  |
| C  | 0.84623800  | -4.53066800 | -1.40314900 |
| H  | 3.83567700  | -4.08065300 | -0.74499700 |
| H  | 3.74358300  | -3.72824200 | 0.98120600  |
| H  | 3.11277100  | -5.27547100 | 0.35984800  |
| H  | 1.39744800  | -4.42012000 | -2.34369200 |
| H  | 0.90176500  | -5.58038200 | -1.08754600 |
| H  | -0.20074400 | -4.27287200 | -1.59357000 |
| H  | 0.89111300  | -0.07367400 | 4.79836200  |
| H  | 0.98436700  | -1.78805900 | 5.27765300  |
| H  | 2.33754100  | -1.01789100 | 4.40501900  |
| H  | -1.84818800 | -2.11001800 | 2.46056800  |
| H  | -1.42424000 | -2.33051700 | 4.18098800  |
| H  | -1.70447200 | -0.69564400 | 3.52342900  |
| H  | 8.47344200  | 0.37590400  | -0.10958700 |
| H  | -0.52422200 | 2.68414800  | -0.19297400 |
| N  | -1.13224100 | 3.48484200  | 0.07225200  |
| Si | -1.97155200 | 4.20467700  | -1.27615900 |
| Si | -1.08435900 | 3.82831200  | 1.77595900  |
| C  | -2.01628100 | 2.50177400  | 2.77122300  |
| H  | -1.93618000 | 2.66229100  | 3.85481400  |
| H  | -3.08172500 | 2.48649500  | 2.51013100  |
| H  | -1.60513200 | 1.50964600  | 2.54337500  |
| C  | 0.71084600  | 3.83853200  | 2.39284900  |
| H  | 0.76638900  | 3.99714600  | 3.47795700  |
| H  | 1.19810900  | 2.88188700  | 2.16454500  |
| H  | 1.28956000  | 4.63186700  | 1.90429000  |
| C  | -1.86737300 | 5.51127600  | 2.16202500  |
| H  | -2.91405000 | 5.56786100  | 1.84084800  |
| H  | -1.84922200 | 5.69591700  | 3.24386500  |
| H  | -1.32448300 | 6.33203800  | 1.67920400  |
| C  | -3.85223100 | 4.25083900  | -1.00755600 |
| H  | -4.25216500 | 3.24040600  | -0.85781900 |
| H  | -4.13213200 | 4.84952900  | -0.13208700 |
| H  | -4.36314300 | 4.68680000  | -1.87620000 |
| C  | -1.40048400 | 5.98344600  | -1.61864200 |
| H  | -1.91367300 | 6.40568900  | -2.49268800 |
| H  | -1.60151700 | 6.64647100  | -0.76849600 |
| H  | -0.32179100 | 6.01712800  | -1.81485900 |
| C  | -1.61834600 | 3.15535800  | -2.81274300 |
| H  | -2.09512900 | 3.59004900  | -3.70051400 |
| H  | -0.54254500 | 3.08452500  | -3.01079400 |
| H  | -1.99933800 | 2.13435000  | -2.69412800 |

**TS2'-O**

|    |             |             |             |
|----|-------------|-------------|-------------|
| C  | 1.08064700  | -0.78446600 | -1.90892300 |
| H  | 1.15857600  | -0.25081900 | -2.87198500 |
| H  | 1.86547800  | -1.56253000 | -1.92033400 |
| C  | -0.30051800 | -1.46703700 | -1.84273400 |
| H  | -1.06157500 | -0.67969900 | -1.82908300 |
| O  | 1.30982300  | 0.09794500  | -0.83796900 |
| N  | -0.41068500 | -2.15565400 | -0.54245500 |
| H  | -1.37529400 | -2.40124500 | -0.31745700 |
| H  | 0.13981200  | -3.01502300 | -0.53392300 |
| C  | -0.54049900 | -2.39063300 | -3.05827100 |
| H  | -0.41563500 | -1.79083200 | -3.97070400 |
| H  | 0.24297500  | -3.16165500 | -3.08365700 |
| C  | -1.90500000 | -3.04831500 | -3.06106000 |
| C  | -2.05459900 | -4.41204500 | -2.77610600 |
| C  | -3.05984300 | -2.29395600 | -3.32128300 |
| C  | -3.31759400 | -5.00904700 | -2.74974500 |
| H  | -1.17070500 | -5.01648200 | -2.58201400 |
| C  | -4.32317300 | -2.88531600 | -3.29641600 |
| H  | -2.96783800 | -1.23281500 | -3.54176300 |
| C  | -4.45695600 | -4.24682500 | -3.00958700 |
| H  | -5.20354200 | -2.28338600 | -3.50688400 |
| H  | -5.44053900 | -4.70884500 | -2.99402500 |
| Ag | 0.22026700  | -0.56098700 | 1.08595400  |
| P  | -0.38222700 | -0.25529300 | 3.38512900  |
| C  | -2.07839100 | -0.86867800 | 3.86245300  |
| H  | -2.28794400 | -0.47389100 | 4.86607300  |
| H  | -2.00288100 | -1.95913200 | 3.97069100  |
| C  | -3.21348200 | -0.48268900 | 2.88642500  |
| H  | -4.15466200 | -0.38786300 | 3.44521400  |
| H  | -3.01850800 | 0.49186800  | 2.42475400  |
| P  | -3.46241500 | -1.71534300 | 1.48987100  |
| C  | -3.01651300 | 5.32915300  | -2.59698100 |
| C  | -2.56459100 | 4.10135200  | -2.11164900 |
| C  | -2.27595200 | 3.96698100  | -0.75167200 |
| C  | -2.44093500 | 5.04113500  | 0.12599500  |
| C  | -2.89112200 | 6.26583900  | -0.36870400 |
| C  | -3.17587800 | 6.41227600  | -1.72876000 |
| H  | -3.24989300 | 5.43829100  | -3.65281100 |
| H  | -2.45417500 | 3.24506700  | -2.76865900 |
| H  | -2.23727500 | 4.90634900  | 1.18316600  |
| H  | -3.02612900 | 7.10416100  | 0.30963900  |
| H  | -3.52826900 | 7.36692900  | -2.11017100 |
| S  | -1.64261000 | 2.38849200  | -0.12568400 |
| O  | -2.11524700 | 2.33555100  | 1.28642800  |
| O  | -2.13095800 | 1.36081800  | -1.08454500 |
| C  | 0.07564600  | 2.44208500  | -0.15825300 |
| H  | 0.52565900  | 2.97069800  | 0.67400600  |
| C  | 0.80025700  | 1.85523500  | -1.18674400 |

|    |             |             |             |
|----|-------------|-------------|-------------|
| H  | 0.28342800  | 1.61811100  | -2.11228600 |
| H  | 1.82890800  | 2.17745200  | -1.30990700 |
| C  | 0.68405600  | -1.10446100 | 4.63855700  |
| C  | -0.38480200 | 1.49212300  | 3.98013300  |
| C  | -4.58863400 | -2.93867400 | 2.34095700  |
| C  | -4.70025600 | -0.77880700 | 0.46533800  |
| H  | -4.91977200 | -3.69276800 | 1.61877400  |
| H  | -4.04382000 | -3.46117200 | 3.13546500  |
| H  | -5.47314900 | -2.45889700 | 2.77854600  |
| H  | -5.09313800 | -1.44053800 | -0.31436700 |
| H  | -5.53778800 | -0.39570200 | 1.06200200  |
| H  | -4.19217300 | 0.05739800  | -0.02527400 |
| H  | 1.70884100  | -0.72907100 | 4.55867400  |
| H  | 0.31890300  | -0.92935000 | 5.65741200  |
| H  | 0.70055700  | -2.18167500 | 4.44540400  |
| H  | -1.03593400 | 2.08361700  | 3.33065700  |
| H  | -0.72240100 | 1.55785800  | 5.02127300  |
| H  | 0.63090600  | 1.89452100  | 3.90660400  |
| H  | -3.40859100 | -6.06983400 | -2.53021200 |
| H  | 3.35395200  | 0.06670200  | -0.66278800 |
| N  | 4.35880500  | -0.07521400 | -0.49032000 |
| Si | 5.40100200  | 0.51025300  | -1.76655300 |
| Si | 4.66387100  | -0.79161400 | 1.07119500  |
| C  | 4.11396300  | 0.36958900  | 2.46971000  |
| H  | 4.25496400  | -0.08801900 | 3.45837300  |
| H  | 4.67831900  | 1.30985500  | 2.45086600  |
| H  | 3.05073400  | 0.62101100  | 2.36033600  |
| C  | 3.68532700  | -2.40812400 | 1.25289200  |
| H  | 3.83256700  | -2.86231900 | 2.24164200  |
| H  | 2.60926200  | -2.22616600 | 1.12680600  |
| H  | 3.99015200  | -3.14101600 | 0.49575800  |
| C  | 6.50619200  | -1.17297500 | 1.28903000  |
| H  | 7.13112000  | -0.27633600 | 1.20516800  |
| H  | 6.68131200  | -1.59908700 | 2.28509400  |
| H  | 6.86453900  | -1.90243000 | 0.55375200  |
| C  | 6.56208100  | 1.88609300  | -1.16657300 |
| H  | 5.99276100  | 2.73277600  | -0.76399600 |
| H  | 7.23816900  | 1.53807800  | -0.37614700 |
| H  | 7.18672100  | 2.26245200  | -1.98725600 |
| C  | 6.47026100  | -0.87212200 | -2.50530000 |
| H  | 7.08022200  | -0.49424600 | -3.33625100 |
| H  | 7.15655700  | -1.30031700 | -1.76539800 |
| H  | 5.84857000  | -1.68921400 | -2.89126600 |
| C  | 4.30524000  | 1.21085900  | -3.14447200 |
| H  | 4.92051200  | 1.55284700  | -3.98622000 |
| H  | 3.60821900  | 0.45722100  | -3.52981200 |
| H  | 3.71418600  | 2.06847300  | -2.80182600 |

**ADD4'-O**

|    |             |             |             |
|----|-------------|-------------|-------------|
| C  | -1.12104800 | -0.27242900 | 2.13471700  |
| H  | -1.32352800 | 0.46838900  | 2.92538700  |
| H  | -1.69869400 | -1.17465500 | 2.37638400  |
| C  | 0.38156100  | -0.59413000 | 2.15281500  |
| H  | 0.93567300  | 0.32145800  | 1.92610800  |
| O  | -1.64586300 | 0.18021500  | 0.89782300  |
| N  | 0.71997100  | -1.55006000 | 1.08465600  |
| H  | 1.72443900  | -1.73431900 | 1.08579200  |
| H  | 0.24257700  | -2.44089200 | 1.22739100  |
| C  | 0.78123100  | -1.07386700 | 3.57066300  |
| H  | 0.46488100  | -0.30753700 | 4.29284900  |
| H  | 0.21813800  | -1.98501900 | 3.81899300  |
| C  | 2.26491000  | -1.33492900 | 3.73599800  |
| C  | 2.74824400  | -2.62549100 | 3.98797800  |
| C  | 3.19110300  | -0.28402300 | 3.63554200  |
| C  | 4.11606900  | -2.86613600 | 4.14354400  |
| H  | 2.04424700  | -3.45072300 | 4.07462500  |
| C  | 4.55704400  | -0.51976700 | 3.79334900  |
| H  | 2.84192200  | 0.72347000  | 3.42286400  |
| C  | 5.02567000  | -1.81239600 | 4.04864200  |
| H  | 5.25657700  | 0.30930700  | 3.72262600  |
| H  | 6.08953100  | -1.99332300 | 4.17840700  |
| Ag | 0.51422400  | -0.56511500 | -1.14942000 |
| P  | 1.35483100  | -1.76281500 | -3.09991400 |
| C  | 3.18563200  | -2.12796400 | -3.08429700 |
| H  | 3.49926400  | -2.30217300 | -4.12262000 |
| H  | 3.32346200  | -3.07993000 | -2.55457700 |
| C  | 4.03586700  | -1.01367100 | -2.43722400 |
| H  | 5.05827400  | -1.04897200 | -2.83748800 |
| H  | 3.63394000  | -0.02287200 | -2.68184000 |
| P  | 4.09389500  | -1.12464900 | -0.56135400 |
| C  | 0.12217500  | 6.24449700  | 0.76449000  |
| C  | 0.51026600  | 4.90321400  | 0.79492700  |
| C  | 0.75915800  | 4.23430000  | -0.40548100 |
| C  | 0.63633000  | 4.89447600  | -1.63169900 |
| C  | 0.24727500  | 6.23366800  | -1.65269100 |
| C  | -0.01424800 | 6.90839000  | -0.45643100 |
| H  | -0.06636400 | 6.77222200  | 1.69574100  |
| H  | 0.64689500  | 4.37921500  | 1.73501000  |
| H  | 0.86683200  | 4.36565300  | -2.55108500 |
| H  | 0.15598500  | 6.75388600  | -2.60256900 |
| H  | -0.31549700 | 7.95236400  | -0.47660800 |
| S  | 1.20466900  | 2.47466200  | -0.38039500 |
| O  | 2.12538300  | 2.29842800  | -1.53411100 |
| O  | 1.71865200  | 2.22069800  | 0.99232800  |
| C  | -0.23637300 | 1.51262800  | -0.65835800 |
| H  | -0.65955800 | 1.87420100  | -1.59935400 |
| C  | -1.25472600 | 1.51215300  | 0.47232700  |

|    |             |             |             |
|----|-------------|-------------|-------------|
| H  | -0.89918300 | 2.06096200  | 1.35341300  |
| H  | -2.19281900 | 1.97292900  | 0.14416100  |
| C  | 0.65014300  | -3.38667800 | -3.65083000 |
| C  | 1.19182000  | -0.73666500 | -4.63387000 |
| C  | 5.50717500  | -2.32935700 | -0.35618800 |
| C  | 4.95829200  | 0.47608700  | -0.18739800 |
| H  | 5.73438200  | -2.43233300 | 0.71037600  |
| H  | 5.21778700  | -3.31907600 | -0.72791400 |
| H  | 6.41532100  | -2.00836700 | -0.88218400 |
| H  | 5.20977500  | 0.50590800  | 0.87757900  |
| H  | 5.87694600  | 0.60240600  | -0.77438200 |
| H  | 4.27265800  | 1.30200300  | -0.39857400 |
| H  | -0.42516200 | -3.27896700 | -3.82410800 |
| H  | 1.12598400  | -3.74288200 | -4.57220300 |
| H  | 0.79129000  | -4.13434700 | -2.86373800 |
| H  | 1.69163400  | 0.22380800  | -4.47522400 |
| H  | 1.62762800  | -1.23518200 | -5.50825700 |
| H  | 0.13329400  | -0.53380400 | -4.82570500 |
| H  | 4.46734000  | -3.87508900 | 4.34442400  |
| H  | -3.55678700 | -0.51419200 | 0.49102200  |
| N  | -4.53277000 | -0.81124700 | 0.39230000  |
| Si | -4.74988800 | -2.01970100 | -0.85029900 |
| Si | -5.61510200 | 0.09430600  | 1.42520500  |
| C  | -7.41464500 | -0.36339900 | 1.05568600  |
| H  | -8.08717900 | 0.25030500  | 1.66814000  |
| H  | -7.67640500 | -0.18507000 | 0.00608400  |
| H  | -7.63261600 | -1.41279300 | 1.28427100  |
| C  | -5.25317300 | -0.26880600 | 3.25158200  |
| H  | -5.89557400 | 0.32148500  | 3.91776300  |
| H  | -5.41509800 | -1.32877700 | 3.48174400  |
| H  | -4.21188200 | -0.03192300 | 3.50426300  |
| C  | -5.38631100 | 1.95567600  | 1.14329500  |
| H  | -5.62898900 | 2.23127500  | 0.10992200  |
| H  | -6.02796300 | 2.54810400  | 1.80836100  |
| H  | -4.34927300 | 2.26103900  | 1.33053900  |
| C  | -5.61499000 | -1.33087900 | -2.39208800 |
| H  | -6.61959800 | -0.95696200 | -2.15951200 |
| H  | -5.04601300 | -0.49696500 | -2.82154500 |
| H  | -5.72326200 | -2.09917400 | -3.16887500 |
| C  | -3.02447900 | -2.62599000 | -1.35010800 |
| H  | -3.08491200 | -3.31009600 | -2.20655300 |
| H  | -2.37068100 | -1.78951500 | -1.62776600 |
| H  | -2.53770700 | -3.16382700 | -0.52705300 |
| C  | -5.75119900 | -3.50499900 | -0.22785500 |
| H  | -5.80097100 | -4.29044800 | -0.99328400 |
| H  | -5.29130800 | -3.93925600 | 0.66806900  |
| H  | -6.78236800 | -3.23426400 | 0.02685400  |

TS3'-O

|    |             |             |             |
|----|-------------|-------------|-------------|
| C  | -0.77822100 | -0.54233800 | -3.36301300 |
| H  | -1.03672800 | 0.13493300  | -4.19203100 |
| H  | -0.76927300 | -1.56194600 | -3.77444400 |
| C  | -1.87797200 | -0.44028200 | -2.28923300 |
| H  | -1.92203100 | 0.59440000  | -1.93706300 |
| O  | 0.52523700  | -0.29557500 | -2.89784700 |
| N  | -1.55318200 | -1.26228600 | -1.10180400 |
| H  | -2.25301400 | -1.07807000 | -0.37763900 |
| H  | -1.62582300 | -2.25373000 | -1.33695200 |
| C  | -3.22095400 | -0.82141900 | -2.97027800 |
| H  | -3.28937000 | -0.25440300 | -3.90977500 |
| H  | -3.17504600 | -1.88168600 | -3.25817900 |
| C  | -4.48058300 | -0.57434100 | -2.16883100 |
| C  | -5.22579600 | -1.63672600 | -1.64141600 |
| C  | -4.95262500 | 0.73213100  | -1.96743800 |
| C  | -6.41020500 | -1.40730400 | -0.93668600 |
| H  | -4.88364900 | -2.65757200 | -1.79855600 |
| C  | -6.13554300 | 0.96737300  | -1.26674400 |
| H  | -4.39082100 | 1.57119500  | -2.37159100 |
| C  | -6.87140700 | -0.10350700 | -0.74953600 |
| H  | -6.49065200 | 1.98643600  | -1.13503100 |
| H  | -7.80073300 | 0.07791100  | -0.21569000 |
| Ag | 0.52099300  | -1.18824800 | 0.42458500  |
| P  | -0.05050400 | -1.88333100 | 2.73873400  |
| C  | -1.69045200 | -1.41172200 | 3.49108800  |
| H  | -1.62309500 | -1.58587800 | 4.57315600  |
| H  | -2.43912800 | -2.11865200 | 3.10967700  |
| C  | -2.09934900 | 0.05148200  | 3.18948400  |
| H  | -2.51569100 | 0.52170500  | 4.09013400  |
| H  | -1.23461200 | 0.65326500  | 2.88477600  |
| P  | -3.33819200 | 0.15457700  | 1.78657400  |
| C  | 1.67046000  | 6.06776300  | -0.63599100 |
| C  | 1.16602000  | 4.81295800  | -0.97375800 |
| C  | 1.14192100  | 3.80249600  | -0.00793100 |
| C  | 1.59738800  | 4.03528900  | 1.28875800  |
| C  | 2.09937600  | 5.29708700  | 1.61916000  |
| C  | 2.13933000  | 6.30942000  | 0.65937300  |
| H  | 1.69224400  | 6.85904800  | -1.38035100 |
| H  | 0.78112800  | 4.62051100  | -1.97052600 |
| H  | 1.55175300  | 3.23680000  | 2.02006400  |
| H  | 2.45773700  | 5.48676600  | 2.62732700  |
| H  | 2.53153800  | 7.28899700  | 0.91923000  |
| S  | 0.44907400  | 2.18672800  | -0.45768200 |
| O  | 0.33573100  | 1.42782000  | 0.82861200  |
| O  | -0.84253600 | 2.47137200  | -1.14556400 |
| C  | 1.61624400  | 1.40537900  | -1.56103800 |
| H  | 2.45520400  | 2.09972400  | -1.65875500 |
| C  | 0.99114600  | 1.06778500  | -2.89769700 |

|    |             |             |             |
|----|-------------|-------------|-------------|
| H  | 0.16030900  | 1.72727400  | -3.17841100 |
| H  | 1.76957600  | 1.14872300  | -3.66879500 |
| C  | 0.04684900  | -3.69089700 | 3.13884100  |
| C  | 1.11050300  | -1.15917700 | 3.98953400  |
| C  | -4.91241300 | -0.17384600 | 2.73359200  |
| C  | -3.45193600 | 1.99686200  | 1.57134300  |
| H  | -5.76354100 | -0.08317600 | 2.05139500  |
| H  | -4.90863000 | -1.19872300 | 3.12215800  |
| H  | -5.05142000 | 0.51858800  | 3.57370400  |
| H  | -4.32997700 | 2.22542500  | 0.95849200  |
| H  | -3.53917500 | 2.52958200  | 2.52679500  |
| H  | -2.56698500 | 2.34934000  | 1.03304800  |
| H  | 1.04074900  | -4.06766200 | 2.87683500  |
| H  | -0.13758300 | -3.88472000 | 4.20225200  |
| H  | -0.68971300 | -4.24063400 | 2.54365800  |
| H  | 1.03123200  | -0.06806600 | 3.96788500  |
| H  | 0.87697700  | -1.51520800 | 5.00025700  |
| H  | 2.14171100  | -1.42479900 | 3.74336900  |
| H  | -6.97622400 | -2.24820500 | -0.54395000 |
| H  | 2.18103500  | 0.13817000  | -1.03788600 |
| N  | 2.65925100  | -0.97359400 | -0.57808600 |
| Si | 3.96483300  | -0.58292400 | 0.54063800  |
| Si | 2.91836300  | -2.26450100 | -1.76267800 |
| C  | 4.23791500  | -3.54397400 | -1.24017000 |
| H  | 4.30309700  | -4.29811700 | -2.03639300 |
| H  | 5.24366100  | -3.13251300 | -1.10413800 |
| H  | 3.96358700  | -4.07067200 | -0.31859200 |
| C  | 1.38130600  | -3.35085900 | -2.02632700 |
| H  | 1.59243800  | -4.12251800 | -2.77936300 |
| H  | 1.10017700  | -3.86545100 | -1.09736200 |
| H  | 0.52744900  | -2.76431200 | -2.36829100 |
| C  | 3.49132600  | -1.59503800 | -3.44532700 |
| H  | 4.37638100  | -0.95500600 | -3.34396000 |
| H  | 3.75675100  | -2.42168600 | -4.11757300 |
| H  | 2.69783000  | -1.01423400 | -3.92409000 |
| C  | 5.58394400  | -0.14099500 | -0.36364200 |
| H  | 5.99092200  | -0.96839800 | -0.95545900 |
| H  | 5.42496000  | 0.70335000  | -1.04649700 |
| H  | 6.35762500  | 0.16041000  | 0.35530500  |
| C  | 3.55673100  | 0.95057500  | 1.57812100  |
| H  | 4.34761900  | 1.10079500  | 2.32542200  |
| H  | 3.51469100  | 1.85451300  | 0.96139800  |
| H  | 2.59868100  | 0.86754900  | 2.09923800  |
| C  | 4.36177300  | -1.97880900 | 1.77969900  |
| H  | 4.87851500  | -1.56530000 | 2.65640200  |
| H  | 3.45226700  | -2.47950000 | 2.13384200  |
| H  | 5.01033500  | -2.74926600 | 1.35188300  |



**ADD5'-O**

|    |             |             |             |
|----|-------------|-------------|-------------|
| C  | -1.89643300 | 0.61832700  | -2.70014200 |
| H  | -2.08942100 | 1.59911500  | -3.16261800 |
| H  | -1.74950700 | -0.10875600 | -3.52038400 |
| C  | -3.10879700 | 0.21193000  | -1.86625300 |
| H  | -3.14629500 | 0.87696300  | -0.99368700 |
| O  | -0.73030100 | 0.69509300  | -1.89968500 |
| N  | -2.96123100 | -1.16479900 | -1.36769500 |
| H  | -3.87429100 | -1.50981500 | -1.07182400 |
| H  | -2.65263800 | -1.77664200 | -2.12349100 |
| C  | -4.39898200 | 0.44500800  | -2.70216200 |
| H  | -4.43300500 | 1.50129700  | -3.00102700 |
| H  | -4.33991700 | -0.14562000 | -3.62709500 |
| C  | -5.66671300 | 0.09058800  | -1.95366900 |
| C  | -6.38719800 | -1.07298400 | -2.25728400 |
| C  | -6.13259000 | 0.90927400  | -0.91203700 |
| C  | -7.54413200 | -1.40977900 | -1.54882900 |
| H  | -6.04624900 | -1.71522500 | -3.06679200 |
| C  | -7.28641700 | 0.57625200  | -0.20309300 |
| H  | -5.58433800 | 1.81190000  | -0.65223100 |
| C  | -7.99768100 | -0.58473800 | -0.51960300 |
| H  | -7.63285400 | 1.22635200  | 0.59609800  |
| H  | -8.89919200 | -0.84115600 | 0.03047600  |
| Ag | 0.93821400  | -1.86350300 | 0.85994200  |
| P  | -1.04045900 | -1.88649600 | 2.18837600  |
| C  | -2.26125700 | -0.49973700 | 2.04088600  |
| H  | -3.12241600 | -0.75864300 | 2.67350100  |
| H  | -2.59133300 | -0.53027400 | 0.99613600  |
| C  | -1.71036100 | 0.88957100  | 2.38751300  |
| H  | -1.31670800 | 0.92041200  | 3.41390400  |
| H  | -0.89070700 | 1.15095500  | 1.70909000  |
| P  | -3.01101300 | 2.23122500  | 2.17580300  |
| C  | 4.57849900  | 5.15690200  | -1.05632400 |
| C  | 3.32142700  | 4.61627500  | -1.32858100 |
| C  | 2.76002700  | 3.71882900  | -0.41745100 |
| C  | 3.41926400  | 3.36443500  | 0.76102300  |
| C  | 4.67773100  | 3.91013400  | 1.02066700  |
| C  | 5.25607400  | 4.80089300  | 0.11312900  |
| H  | 5.02559200  | 5.86012200  | -1.75323700 |
| H  | 2.76950700  | 4.89580700  | -2.22012900 |
| H  | 2.94683700  | 2.68640000  | 1.46355100  |
| H  | 5.20228300  | 3.64144400  | 1.93295300  |
| H  | 6.23526400  | 5.22377700  | 0.32030600  |
| S  | 1.13880300  | 3.01337800  | -0.77186700 |
| O  | 0.52594300  | 2.65542000  | 0.52306400  |
| O  | 0.45026000  | 3.93152700  | -1.69867300 |
| C  | 1.53068300  | 1.48301100  | -1.70362200 |
| H  | 2.43180500  | 1.70301200  | -2.28450800 |
| C  | 0.39955600  | 1.10540700  | -2.64570600 |

|    |             |             |             |
|----|-------------|-------------|-------------|
| H  | 0.14952800  | 1.96827700  | -3.27998900 |
| H  | 0.75228100  | 0.28970400  | -3.29703000 |
| C  | -2.09548200 | -3.35768700 | 1.81437600  |
| C  | -0.74161500 | -2.04588700 | 4.00701800  |
| C  | -4.00419300 | 1.97512500  | 3.73946600  |
| C  | -1.99225700 | 3.70225200  | 2.69310100  |
| H  | -4.71219200 | 2.80312300  | 3.85715700  |
| H  | -4.59040600 | 1.05212800  | 3.67076800  |
| H  | -3.37348200 | 1.92748100  | 4.63667600  |
| H  | -2.62205700 | 4.59848700  | 2.70992500  |
| H  | -1.54121600 | 3.57155600  | 3.68518400  |
| H  | -1.19439200 | 3.85145500  | 1.95963100  |
| H  | -1.51516100 | -4.27790100 | 1.93237700  |
| H  | -2.97170200 | -3.39741200 | 2.47194700  |
| H  | -2.42900600 | -3.28552800 | 0.77493400  |
| H  | -0.18418700 | -1.17780300 | 4.37091700  |
| H  | -1.68621600 | -2.12040000 | 4.55837600  |
| H  | -0.14123300 | -2.93993400 | 4.20297600  |
| H  | -8.09079200 | -2.31335900 | -1.80628600 |
| H  | 1.75623700  | 0.69189800  | -0.98175900 |
| N  | 2.70451700  | -2.02342500 | -0.26936600 |
| Si | 4.13363900  | -1.95573400 | 0.70151400  |
| Si | 2.54102400  | -2.75013500 | -1.82791400 |
| C  | 3.23249200  | -4.52484800 | -1.92557200 |
| H  | 3.08266700  | -4.95892900 | -2.92326700 |
| H  | 4.30823200  | -4.55825500 | -1.71180000 |
| H  | 2.73470900  | -5.17956900 | -1.19868700 |
| C  | 0.70522400  | -2.86714500 | -2.32989300 |
| H  | 0.60641200  | -3.18676700 | -3.37659700 |
| H  | 0.17507800  | -3.60345800 | -1.71086300 |
| H  | 0.18723800  | -1.90699000 | -2.21445400 |
| C  | 3.41974000  | -1.76034300 | -3.20322600 |
| H  | 4.50254300  | -1.71423400 | -3.03922900 |
| H  | 3.25456800  | -2.21880900 | -4.18750400 |
| H  | 3.05577200  | -0.72622500 | -3.25448300 |
| C  | 5.72966400  | -1.75615800 | -0.32192800 |
| H  | 5.89336000  | -2.59750100 | -1.00661800 |
| H  | 5.71095000  | -0.83902700 | -0.92340000 |
| H  | 6.60442100  | -1.70074200 | 0.33951600  |
| C  | 4.06952800  | -0.46686100 | 1.88814200  |
| H  | 4.94193800  | -0.44852400 | 2.55504900  |
| H  | 4.05725800  | 0.47622600  | 1.32815800  |
| H  | 3.17029200  | -0.48923400 | 2.51865400  |
| C  | 4.36924100  | -3.50534500 | 1.78706800  |
| H  | 5.27490000  | -3.44076900 | 2.40516600  |
| H  | 3.51356200  | -3.64244200 | 2.46208000  |
| H  | 4.44710600  | -4.41108400 | 1.17271100  |

**ADD3-N**

|    |             |             |             |
|----|-------------|-------------|-------------|
| Ag | -0.92381100 | -0.99082300 | 0.28128700  |
| P  | 0.10309100  | -3.15563700 | 0.54975000  |
| C  | -1.21852600 | -4.31520400 | 1.18147900  |
| H  | -0.74550500 | -5.26426200 | 1.46772400  |
| H  | -1.88143700 | -4.53618100 | 0.33495100  |
| C  | -2.02983100 | -3.74927100 | 2.36348800  |
| H  | -2.72993800 | -4.51137000 | 2.73120600  |
| H  | -1.35640300 | -3.51433900 | 3.19841100  |
| P  | -2.96702700 | -2.17255200 | 1.95510600  |
| C  | 1.43729000  | -3.28501400 | 1.81744800  |
| H  | 1.68884100  | -4.33525300 | 2.00695200  |
| H  | 2.32633600  | -2.76923600 | 1.44314200  |
| H  | 1.12226600  | -2.81353200 | 2.75348900  |
| C  | 0.81287500  | -4.04800800 | -0.89492900 |
| H  | 0.12113700  | -4.00751400 | -1.74165700 |
| H  | 1.75212300  | -3.55298500 | -1.16398400 |
| H  | 1.02030100  | -5.09431500 | -0.64199000 |
| C  | -3.65785300 | -1.75771700 | 3.63099200  |
| H  | -4.36901400 | -0.93126900 | 3.53073600  |
| H  | -4.17021300 | -2.60931300 | 4.09553500  |
| H  | -2.84995300 | -1.42475800 | 4.29138100  |
| C  | -4.47736800 | -2.86236800 | 1.11761800  |
| H  | -4.97845000 | -3.62362200 | 1.72795700  |
| H  | -5.17777700 | -2.04560800 | 0.91755600  |
| H  | -4.20282700 | -3.30350600 | 0.15392500  |
| C  | -0.66346500 | 1.94823700  | -0.89621100 |
| H  | -0.52210200 | 1.62858000  | -1.95017200 |
| H  | -1.21208700 | 2.90654000  | -0.94129800 |
| C  | 0.74056300  | 2.29395000  | -0.33656400 |
| H  | 1.20939200  | 3.05288100  | -0.97478600 |
| O  | -1.37185900 | 1.02897400  | -0.14322100 |
| N  | 1.59852200  | 1.06269300  | -0.44447400 |
| H  | 2.25071300  | 0.91294900  | 0.34509400  |
| C  | 0.69829600  | 2.79994100  | 1.11743500  |
| H  | -0.02615300 | 3.62318500  | 1.14218400  |
| H  | 0.28335000  | 2.00789900  | 1.75069800  |
| C  | 2.04080200  | 3.26996400  | 1.63922700  |
| C  | 2.84921200  | 2.43729500  | 2.42589000  |
| C  | 2.52095800  | 4.54824300  | 1.31176900  |
| C  | 4.10590800  | 2.86380000  | 2.86520200  |
| H  | 2.49910600  | 1.44456600  | 2.69975600  |
| C  | 3.77104700  | 4.98009900  | 1.75330200  |
| H  | 1.90302400  | 5.21361800  | 0.71146000  |
| C  | 4.56980200  | 4.13631200  | 2.53084700  |
| H  | 4.71659700  | 2.19874200  | 3.46956500  |
| H  | 4.12112000  | 5.97608000  | 1.49433600  |
| H  | 5.54402200  | 4.47181800  | 2.87596700  |
| C  | 7.55657000  | 0.74088400  | -0.67851600 |

|    |             |             |             |
|----|-------------|-------------|-------------|
| C  | 6.23532900  | 0.40477600  | -0.37680300 |
| C  | 5.68830400  | -0.77372800 | -0.89495400 |
| C  | 6.45653600  | -1.61673400 | -1.70472100 |
| C  | 7.77651800  | -1.27477300 | -1.99794900 |
| C  | 8.32771700  | -0.09452100 | -1.48974900 |
| H  | 7.98691300  | 1.65193500  | -0.27010200 |
| H  | 5.63640700  | 1.02910300  | 0.27818000  |
| H  | 6.02302800  | -2.53964500 | -2.07613500 |
| H  | 8.37875900  | -1.93424900 | -2.61778700 |
| H  | 9.35737600  | 0.16754400  | -1.71873400 |
| S  | 3.93512300  | -1.16233200 | -0.61252100 |
| O  | 3.88448000  | -2.64931200 | -0.61753500 |
| O  | 3.62670400  | -0.43639300 | 0.67346500  |
| C  | 2.90744700  | -0.53714200 | -1.78874900 |
| H  | 2.88714000  | -1.05593000 | -2.73871900 |
| C  | 2.49628400  | 0.87850300  | -1.68886500 |
| H  | 3.27659300  | 1.64322100  | -1.54298000 |
| H  | 1.89634200  | 1.16590000  | -2.55617900 |
| H  | 0.98890300  | 0.22868000  | -0.41581900 |
| H  | -3.21033400 | 1.14695600  | -0.73252900 |
| N  | -4.18292100 | 1.26700500  | -1.06165900 |
| Si | -4.49655300 | 0.49906800  | -2.59405500 |
| Si | -5.12342000 | 2.26888300  | 0.01457500  |
| C  | -6.23088800 | 1.23106300  | 1.16130400  |
| H  | -6.82703700 | 1.86082600  | 1.83458000  |
| H  | -6.92834200 | 0.60971600  | 0.58579800  |
| H  | -5.62472800 | 0.55957800  | 1.78348900  |
| C  | -3.90918200 | 3.25974100  | 1.07758100  |
| H  | -3.10127600 | 2.61278500  | 1.44046400  |
| H  | -3.44748200 | 4.06491500  | 0.49210000  |
| H  | -4.40449400 | 3.71881500  | 1.94285100  |
| C  | -6.24732600 | 3.46859100  | -0.93219800 |
| H  | -7.00323100 | 2.95028100  | -1.53352300 |
| H  | -6.78339700 | 4.12558100  | -0.23469000 |
| H  | -5.66445100 | 4.10652200  | -1.60773900 |
| C  | -3.50354700 | -1.11738000 | -2.68265800 |
| H  | -3.55571400 | -1.57317900 | -3.68020300 |
| H  | -2.44577100 | -0.94182700 | -2.44986200 |
| H  | -3.88622300 | -1.84572900 | -1.95808200 |
| C  | -6.33879900 | 0.09133900  | -2.78643400 |
| H  | -6.51030800 | -0.46180400 | -3.71890300 |
| H  | -6.70529600 | -0.52980600 | -1.96073100 |
| H  | -6.96095300 | 0.99193500  | -2.82618200 |
| C  | -3.97249400 | 1.58475500  | -4.06132500 |
| H  | -4.50820400 | 2.54291800  | -4.05455500 |
| H  | -2.89847100 | 1.80956300  | -4.01796900 |
| H  | -4.17115400 | 1.09793900  | -5.02490700 |

TS2-N

|    |             |             |             |
|----|-------------|-------------|-------------|
| Ag | -0.53028000 | -0.91538200 | 0.21520700  |
| P  | 0.17025800  | -3.03634400 | 1.01961300  |
| C  | -1.17229900 | -4.05693300 | 1.81426800  |
| H  | -0.77673600 | -5.07511500 | 1.93460000  |
| H  | -1.99266900 | -4.12288100 | 1.08883900  |
| C  | -1.69209800 | -3.55065000 | 3.17243900  |
| H  | -2.45465200 | -4.25287400 | 3.53833400  |
| H  | -0.87646300 | -3.56642300 | 3.90669300  |
| P  | -2.39487100 | -1.80371000 | 3.18754500  |
| C  | 1.52541300  | -3.01914200 | 2.26807000  |
| H  | 1.69601900  | -4.02349500 | 2.67363700  |
| H  | 2.43741600  | -2.67156500 | 1.77348600  |
| H  | 1.27933600  | -2.33464800 | 3.08483000  |
| C  | 0.81572700  | -4.16826100 | -0.28501800 |
| H  | 0.07192700  | -4.28695400 | -1.07909000 |
| H  | 1.72242900  | -3.71905600 | -0.70080300 |
| H  | 1.05999000  | -5.15203500 | 0.13240800  |
| C  | -3.04574900 | -1.80092400 | 4.93672000  |
| H  | -3.63207700 | -0.89049800 | 5.10062500  |
| H  | -3.67890800 | -2.66990500 | 5.15651600  |
| H  | -2.20875100 | -1.78681700 | 5.64323400  |
| C  | -3.98904600 | -2.08273400 | 2.26353800  |
| H  | -4.53800600 | -2.96209300 | 2.62445900  |
| H  | -4.62584200 | -1.19920800 | 2.37948200  |
| H  | -3.79233500 | -2.19592600 | 1.19282200  |
| C  | -0.58155500 | 1.84743800  | -1.21084600 |
| H  | -0.18238700 | 1.47861500  | -2.17843300 |
| H  | -1.26357000 | 2.67901300  | -1.46757200 |
| C  | 0.59533800  | 2.50265300  | -0.44285100 |
| H  | 0.94661700  | 3.36524500  | -1.02878100 |
| O  | -1.28003100 | 0.87891100  | -0.51102100 |
| N  | 1.73257900  | 1.54924100  | -0.32587500 |
| H  | 2.30908000  | 1.72258200  | 0.50227400  |
| C  | 0.16584900  | 2.98580300  | 0.95556100  |
| H  | -0.71116600 | 3.62914900  | 0.81574000  |
| H  | -0.17831700 | 2.11750000  | 1.52703300  |
| C  | 1.24944900  | 3.72969300  | 1.70739100  |
| C  | 2.00194800  | 3.09579900  | 2.70691600  |
| C  | 1.54795700  | 5.06671400  | 1.39967700  |
| C  | 3.02788200  | 3.77188100  | 3.37355800  |
| H  | 1.77515600  | 2.06570600  | 2.97495600  |
| C  | 2.56690900  | 5.74670100  | 2.06575200  |
| H  | 0.96807900  | 5.58008600  | 0.63511800  |
| C  | 3.31334700  | 5.09923000  | 3.05458300  |
| H  | 3.59884600  | 3.25942400  | 4.14317500  |
| H  | 2.77692900  | 6.78376800  | 1.81660100  |
| H  | 4.10748700  | 5.62854600  | 3.57429600  |
| C  | 7.61421300  | 0.38534900  | -1.70947800 |

|    |             |             |             |
|----|-------------|-------------|-------------|
| C  | 6.40407500  | 0.28707200  | -1.01925100 |
| C  | 5.54613700  | -0.78035500 | -1.29409000 |
| C  | 5.88558800  | -1.75180000 | -2.24031100 |
| C  | 7.09631800  | -1.64475500 | -2.92398700 |
| C  | 7.95849400  | -0.57554000 | -2.66249600 |
| H  | 8.29092300  | 1.20837900  | -1.49607500 |
| H  | 6.13105800  | 1.00778100  | -0.25571900 |
| H  | 5.21783400  | -2.58908900 | -2.41650600 |
| H  | 7.37118500  | -2.39970700 | -3.65564000 |
| H  | 8.90175800  | -0.49702700 | -3.19628100 |
| S  | 3.95061600  | -0.88417000 | -0.44656900 |
| O  | 3.68329100  | -2.33412000 | -0.26991900 |
| O  | 4.07268800  | -0.01082000 | 0.75025500  |
| C  | 2.68653500  | -0.21583100 | -1.43776700 |
| H  | 2.54595800  | -0.78456000 | -2.35578500 |
| C  | 2.64187800  | 1.30516300  | -1.51117800 |
| H  | 3.57883500  | 1.85972900  | -1.40187300 |
| H  | 2.13129100  | 1.63483100  | -2.41831800 |
| H  | 1.63528600  | 0.27106700  | -0.45514200 |
| H  | -3.07060900 | 0.85935400  | -1.17936900 |
| N  | -4.00366300 | 0.82889200  | -1.62651100 |
| Si | -4.08902100 | -0.38260300 | -2.87361300 |
| Si | -5.12960300 | 1.95901700  | -0.92190100 |
| C  | -6.45458600 | 1.10151400  | 0.13769200  |
| H  | -7.15346400 | 1.82840300  | 0.57226200  |
| H  | -7.04571600 | 0.38975400  | -0.45236900 |
| H  | -5.99713700 | 0.54215700  | 0.96349400  |
| C  | -4.12902100 | 3.12704100  | 0.18516200  |
| H  | -3.45732900 | 2.56300200  | 0.84274000  |
| H  | -3.50919800 | 3.80103100  | -0.41933500 |
| H  | -4.78230600 | 3.74759100  | 0.81121700  |
| C  | -6.03493300 | 2.98910500  | -2.23302900 |
| H  | -6.67867600 | 2.37384700  | -2.87195000 |
| H  | -6.67398600 | 3.74547900  | -1.75863000 |
| H  | -5.32354900 | 3.51311200  | -2.88281800 |
| C  | -3.66558100 | -2.09319200 | -2.15978600 |
| H  | -3.63990100 | -2.86986600 | -2.93560600 |
| H  | -2.67826900 | -2.06526600 | -1.67880500 |
| H  | -4.39951100 | -2.39478600 | -1.40177600 |
| C  | -5.82777900 | -0.45891300 | -3.62323600 |
| H  | -5.89521100 | -1.29072200 | -4.33587200 |
| H  | -6.59787800 | -0.61986000 | -2.85918700 |
| H  | -6.08113800 | 0.45863800  | -4.16621300 |
| C  | -2.83611600 | -0.02238300 | -4.25178100 |
| H  | -3.05653700 | 0.93123400  | -4.74658100 |
| H  | -1.82090500 | 0.04655700  | -3.84027300 |
| H  | -2.83274600 | -0.80767400 | -5.01902400 |

**ADD4-N**

|    |             |             |             |
|----|-------------|-------------|-------------|
| Ag | 0.57803200  | 0.56228600  | -0.38167200 |
| P  | 0.21111900  | 2.18820100  | -2.07872900 |
| C  | 1.68214700  | 3.27279900  | -2.45875500 |
| H  | 1.49498900  | 3.76248300  | -3.42460400 |
| H  | 2.53345000  | 2.59754300  | -2.60654800 |
| C  | 2.02622900  | 4.34337100  | -1.40663800 |
| H  | 2.95179300  | 4.84889500  | -1.71707700 |
| H  | 1.24077200  | 5.10998400  | -1.39748900 |
| P  | 2.20086100  | 3.74962100  | 0.37245600  |
| C  | -1.15704900 | 3.38467400  | -1.75865700 |
| H  | -1.24357100 | 4.11757400  | -2.56941800 |
| H  | -2.09321800 | 2.82654900  | -1.66430900 |
| H  | -0.97260900 | 3.90634000  | -0.81500600 |
| C  | -0.20991000 | 1.53421800  | -3.75749300 |
| H  | 0.57037700  | 0.84335300  | -4.09255400 |
| H  | -1.16194600 | 0.99506000  | -3.71935000 |
| H  | -0.29968000 | 2.34963300  | -4.48484000 |
| C  | 2.85238000  | 5.34014100  | 1.10226300  |
| H  | 3.14761300  | 5.16355700  | 2.14205700  |
| H  | 3.71769700  | 5.73583100  | 0.55530800  |
| H  | 2.06173400  | 6.09856400  | 1.10689000  |
| C  | 3.78898400  | 2.78428400  | 0.26209100  |
| H  | 4.57033800  | 3.31887500  | -0.29372100 |
| H  | 4.14914600  | 2.58760400  | 1.27737000  |
| H  | 3.61165300  | 1.81005800  | -0.20373300 |
| C  | 0.70570900  | -1.64858300 | 1.66264200  |
| H  | 0.63968500  | -2.57489200 | 1.05022300  |
| H  | 1.13872100  | -1.96591800 | 2.63192600  |
| C  | -0.74779000 | -1.19686800 | 1.96638500  |
| H  | -1.27596400 | -2.05265700 | 2.42712000  |
| O  | 1.49557100  | -0.68251200 | 1.06565400  |
| N  | -1.41787200 | -0.79952000 | 0.71186000  |
| H  | -2.12743400 | -0.09211100 | 0.88471800  |
| C  | -0.78267400 | -0.02620400 | 2.97235800  |
| H  | -0.19634600 | -0.33176100 | 3.84760900  |
| H  | -0.26271900 | 0.83134900  | 2.53034200  |
| C  | -2.18327600 | 0.36169800  | 3.39920400  |
| C  | -2.84657800 | 1.45337300  | 2.81889900  |
| C  | -2.87201600 | -0.39200700 | 4.36343300  |
| C  | -4.15954400 | 1.77433200  | 3.17761800  |
| H  | -2.32671200 | 2.06479700  | 2.08445900  |
| C  | -4.17926000 | -0.07278100 | 4.72987800  |
| H  | -2.37161400 | -1.23531100 | 4.83507100  |
| C  | -4.83113700 | 1.01100700  | 4.13384800  |
| H  | -4.65068700 | 2.62650600  | 2.71481400  |
| H  | -4.68862000 | -0.66630800 | 5.48510500  |
| H  | -5.84812700 | 1.26435300  | 4.42202200  |
| C  | -6.78296800 | -1.52121800 | 0.49086800  |

|    |             |             |             |
|----|-------------|-------------|-------------|
| C  | -5.60298400 | -0.89865000 | 0.07990500  |
| C  | -5.15522400 | -1.10347400 | -1.22790300 |
| C  | -5.86480000 | -1.89922300 | -2.13126500 |
| C  | -7.04275900 | -2.51378200 | -1.70667600 |
| C  | -7.49730000 | -2.32824600 | -0.39782900 |
| H  | -7.14358800 | -1.36930500 | 1.50393900  |
| H  | -5.05109100 | -0.25029500 | 0.75293200  |
| H  | -5.50845900 | -2.01219800 | -3.15015900 |
| H  | -7.60871500 | -3.13068400 | -2.39869400 |
| H  | -8.41576600 | -2.80888200 | -0.07248700 |
| S  | -3.62560000 | -0.32533900 | -1.76781000 |
| O  | -3.68881500 | -0.13215800 | -3.22906000 |
| O  | -3.38073000 | 0.83393800  | -0.88206000 |
| C  | -2.33002300 | -1.57489400 | -1.47561700 |
| H  | -2.65214400 | -2.46006300 | -2.03354300 |
| C  | -2.01997700 | -1.91190300 | -0.01737000 |
| H  | -2.92285900 | -2.30690600 | 0.48073400  |
| H  | -1.29647000 | -2.73371200 | -0.04420000 |
| H  | -1.44847100 | -1.14925400 | -1.96628700 |
| H  | 3.12851600  | -1.34857400 | 0.46834900  |
| N  | 4.04052700  | -1.73267500 | 0.14923100  |
| Si | 4.01255600  | -2.25775200 | -1.50545700 |
| Si | 5.19915000  | -1.80492800 | 1.45140700  |
| C  | 6.95478300  | -1.39386400 | 0.85662400  |
| H  | 7.64942600  | -1.35878700 | 1.70620000  |
| H  | 7.34466300  | -2.13708700 | 0.15116100  |
| H  | 6.98560700  | -0.41537900 | 0.36185200  |
| C  | 4.66536000  | -0.53206700 | 2.74878400  |
| H  | 4.96692000  | 0.47933900  | 2.44924600  |
| H  | 3.57340200  | -0.52797900 | 2.84528300  |
| H  | 5.10633100  | -0.73566000 | 3.73257700  |
| C  | 5.25913100  | -3.52004000 | 2.26851900  |
| H  | 5.54261200  | -4.29759800 | 1.54804200  |
| H  | 5.98477200  | -3.55176000 | 3.09216300  |
| H  | 4.27820200  | -3.79349500 | 2.67693900  |
| C  | 4.30074500  | -0.81165400 | -2.70907100 |
| H  | 4.25823300  | -1.12983600 | -3.75935400 |
| H  | 3.53612300  | -0.03692100 | -2.56094700 |
| H  | 5.27884100  | -0.34515500 | -2.53797000 |
| C  | 5.33414700  | -3.57372500 | -1.84806200 |
| H  | 5.25597200  | -3.93312100 | -2.88225800 |
| H  | 6.35117300  | -3.18699100 | -1.71515900 |
| H  | 5.21742100  | -4.44060500 | -1.18663300 |
| C  | 2.30309000  | -2.98429100 | -1.89958100 |
| H  | 2.12009000  | -3.89657000 | -1.31894300 |
| H  | 1.51816400  | -2.26229800 | -1.63877700 |
| H  | 2.19988000  | -3.23145400 | -2.96431400 |



TS3-N

|    |             |             |             |
|----|-------------|-------------|-------------|
| Ag | 1.60824000  | -0.02154300 | -0.13604200 |
| P  | 1.03311200  | 1.50859900  | -1.89999500 |
| C  | 2.39796500  | 2.50715200  | -2.70571700 |
| H  | 2.04810800  | 2.75894200  | -3.71635500 |
| H  | 3.25609800  | 1.83579100  | -2.83000600 |
| C  | 2.82166800  | 3.80390900  | -1.99316400 |
| H  | 3.56427900  | 4.31874300  | -2.61955100 |
| H  | 1.96033200  | 4.47943200  | -1.91756200 |
| P  | 3.50388800  | 3.60043300  | -0.25393000 |
| C  | -0.27968700 | 2.76827200  | -1.57642100 |
| H  | -0.40134900 | 3.44162900  | -2.43339000 |
| H  | -1.22568400 | 2.24698400  | -1.40251500 |
| H  | -0.02550800 | 3.35495800  | -0.68876200 |
| C  | 0.35239400  | 0.62023900  | -3.37448100 |
| H  | 1.07617500  | -0.11884800 | -3.73188900 |
| H  | -0.56865400 | 0.10136200  | -3.09640400 |
| H  | 0.12306100  | 1.31954800  | -4.18672400 |
| C  | 3.92723900  | 5.38771400  | 0.07567800  |
| H  | 4.49738300  | 5.45607700  | 1.00830000  |
| H  | 4.51817400  | 5.84142100  | -0.73010500 |
| H  | 3.00746600  | 5.96778000  | 0.20778900  |
| C  | 5.20693800  | 2.95377500  | -0.65470300 |
| H  | 5.71750500  | 3.55808900  | -1.41550900 |
| H  | 5.81343100  | 2.94901600  | 0.25696900  |
| H  | 5.14441400  | 1.91839800  | -1.00461700 |
| C  | -0.00773900 | -1.67888200 | 2.40868600  |
| H  | -0.11816200 | -2.66029000 | 1.90979200  |
| H  | 0.05877200  | -1.88817500 | 3.49384600  |
| C  | -1.31262400 | -0.88685400 | 2.18515400  |
| H  | -2.11217400 | -1.42887300 | 2.72642100  |
| O  | 1.12492100  | -0.99918700 | 1.96843500  |
| N  | -1.64301600 | -0.80992700 | 0.75205100  |
| H  | -2.07352100 | 0.08196100  | 0.52396600  |
| C  | -1.21591100 | 0.52399800  | 2.80285500  |
| H  | -0.81759900 | 0.41234300  | 3.81899100  |
| H  | -0.47187900 | 1.10006200  | 2.24240900  |
| C  | -2.53857800 | 1.26175900  | 2.85345200  |
| C  | -2.83009300 | 2.30528500  | 1.96339500  |
| C  | -3.51951000 | 0.90374600  | 3.79290700  |
| C  | -4.06125900 | 2.96724200  | 2.00293300  |
| H  | -2.08167200 | 2.60781100  | 1.23478500  |
| C  | -4.74850300 | 1.56136900  | 3.83984200  |
| H  | -3.30996800 | 0.10407300  | 4.50029000  |
| C  | -5.02554500 | 2.59724900  | 2.94203000  |
| H  | -4.26176100 | 3.77442600  | 1.30312500  |
| H  | -5.48750100 | 1.27274900  | 4.58329300  |
| H  | -5.97869900 | 3.11821600  | 2.98326100  |
| C  | -6.93627100 | -0.13242300 | 0.37214300  |

|    |             |             |             |
|----|-------------|-------------|-------------|
| C  | -5.63847500 | 0.00692600  | -0.12283500 |
| C  | -5.29012800 | -0.66894300 | -1.29482800 |
| C  | -6.20909000 | -1.46307200 | -1.98605600 |
| C  | -7.50260900 | -1.59187600 | -1.48008700 |
| C  | -7.86287000 | -0.93140100 | -0.30179700 |
| H  | -7.21719300 | 0.38906300  | 1.28230900  |
| H  | -4.91793600 | 0.64302200  | 0.38041400  |
| H  | -5.91665200 | -1.94878600 | -2.91145400 |
| H  | -8.23011200 | -2.20124000 | -2.00857800 |
| H  | -8.87190300 | -1.03517500 | 0.08775500  |
| S  | -3.61780600 | -0.51701800 | -1.94001800 |
| O  | -3.65604100 | -0.74835800 | -3.39432300 |
| O  | -3.04748200 | 0.74168800  | -1.40869000 |
| C  | -2.69888300 | -1.91427700 | -1.21330100 |
| H  | -3.23689700 | -2.81098600 | -1.53634400 |
| C  | -2.51275200 | -1.88781700 | 0.30358300  |
| H  | -3.50179800 | -1.88826700 | 0.80049100  |
| H  | -2.04054900 | -2.84222000 | 0.56551000  |
| H  | -1.73162500 | -1.88195300 | -1.72481700 |
| H  | 2.01328300  | -1.64429200 | 1.41908000  |
| N  | 2.98888100  | -1.84617200 | 0.60136100  |
| Si | 2.85811900  | -3.15382100 | -0.54374500 |
| Si | 4.46302800  | -1.37829900 | 1.42728700  |
| C  | 5.94457700  | -1.23408100 | 0.23964000  |
| H  | 6.83696800  | -0.88483100 | 0.77556400  |
| H  | 6.19933700  | -2.19476600 | -0.22478200 |
| H  | 5.74455900  | -0.52095700 | -0.57000600 |
| C  | 4.20665600  | 0.29223700  | 2.28241900  |
| H  | 4.00765200  | 1.10038300  | 1.56796800  |
| H  | 3.34439300  | 0.23839700  | 2.95672900  |
| H  | 5.08959400  | 0.57337500  | 2.87213300  |
| C  | 4.93519100  | -2.62212200 | 2.78634200  |
| H  | 5.15795600  | -3.61635900 | 2.38271300  |
| H  | 5.81929700  | -2.28276500 | 3.34213300  |
| H  | 4.11467900  | -2.73298300 | 3.50633900  |
| C  | 3.48522800  | -2.65702400 | -2.27159200 |
| H  | 3.37484300  | -3.47941200 | -2.99086900 |
| H  | 2.92373100  | -1.79623000 | -2.65849100 |
| H  | 4.54455400  | -2.37408500 | -2.25031400 |
| C  | 3.81206600  | -4.72292800 | -0.04126100 |
| H  | 3.64044000  | -5.52782700 | -0.76825200 |
| H  | 4.89477300  | -4.55419300 | 0.00859200  |
| H  | 3.49098800  | -5.08897600 | 0.94151800  |
| C  | 1.03455500  | -3.65767200 | -0.73151200 |
| H  | 0.66055500  | -4.13997800 | 0.17989800  |
| H  | 0.39828300  | -2.78588300 | -0.92796600 |
| H  | 0.90833300  | -4.36613100 | -1.56064100 |

**ADD5-N**

|    |             |             |             |
|----|-------------|-------------|-------------|
| Ag | 2.06870700  | 0.35842500  | -0.40396400 |
| P  | 1.40627200  | 2.66449400  | -0.31392000 |
| C  | 2.76312900  | 3.93764400  | -0.12797800 |
| H  | 2.33246200  | 4.89921800  | -0.43983000 |
| H  | 3.53421200  | 3.68672500  | -0.86684100 |
| C  | 3.38761100  | 4.09907600  | 1.26855900  |
| H  | 4.12981600  | 4.90914000  | 1.22572000  |
| H  | 2.61793200  | 4.42056500  | 1.98160300  |
| P  | 4.18199700  | 2.55533300  | 1.98763900  |
| C  | 0.18147800  | 3.13089400  | 0.98422000  |
| H  | -0.00936900 | 4.21054200  | 0.97550200  |
| H  | -0.75690900 | 2.60170000  | 0.79054600  |
| H  | 0.55409400  | 2.83645700  | 1.96984400  |
| C  | 0.61043800  | 3.26044100  | -1.87280000 |
| H  | 1.28495300  | 3.09129500  | -2.71852400 |
| H  | -0.32459500 | 2.72519600  | -2.05903700 |
| H  | 0.38459900  | 4.33102400  | -1.80661000 |
| C  | 4.92207300  | 3.32377200  | 3.51822400  |
| H  | 5.56366500  | 2.58876200  | 4.01575700  |
| H  | 5.51795500  | 4.21905400  | 3.30015500  |
| H  | 4.12422500  | 3.59321000  | 4.21881200  |
| C  | 5.70880100  | 2.45432500  | 0.92127800  |
| H  | 6.24300900  | 3.41093000  | 0.85521700  |
| H  | 6.38585400  | 1.70042600  | 1.33625500  |
| H  | 5.44032200  | 2.12446600  | -0.08774500 |
| C  | -0.62474200 | -3.53834300 | 0.33012400  |
| H  | -0.57845500 | -3.63277800 | -0.76574000 |
| H  | -0.75681900 | -4.55235700 | 0.73768500  |
| C  | -1.86465700 | -2.70252800 | 0.70911000  |
| H  | -2.75420700 | -3.31338300 | 0.46539200  |
| O  | 0.57115400  | -3.01475000 | 0.85862400  |
| N  | -1.89597900 | -1.44547900 | -0.05383000 |
| H  | -2.14461000 | -0.65698200 | 0.53631200  |
| C  | -1.88798500 | -2.43144700 | 2.22876500  |
| H  | -1.72654000 | -3.38821400 | 2.74142900  |
| H  | -1.02561400 | -1.80297400 | 2.47386400  |
| C  | -3.17128700 | -1.79802400 | 2.72485200  |
| C  | -3.22605600 | -0.44045400 | 3.07177000  |
| C  | -4.34610400 | -2.55816200 | 2.84590300  |
| C  | -4.41419600 | 0.14267200  | 3.52286800  |
| H  | -2.32593600 | 0.16532300  | 2.99624600  |
| C  | -5.53432000 | -1.98321400 | 3.29676300  |
| H  | -4.32315600 | -3.61623100 | 2.59214100  |
| C  | -5.57306400 | -0.62742400 | 3.63799000  |
| H  | -4.42919700 | 1.19622600  | 3.79029000  |
| H  | -6.42814600 | -2.59495100 | 3.39238900  |
| H  | -6.49453200 | -0.17995800 | 4.00236200  |
| C  | -6.96298200 | 0.56450100  | -0.12000700 |

|    |             |             |             |
|----|-------------|-------------|-------------|
| C  | -5.57333700 | 0.68931700  | -0.16317500 |
| C  | -4.97946800 | 1.18496200  | -1.32643700 |
| C  | -5.73954600 | 1.56991900  | -2.43402100 |
| C  | -7.12739500 | 1.44185100  | -2.37496900 |
| C  | -7.73611800 | 0.93619100  | -1.22241500 |
| H  | -7.43470800 | 0.18036900  | 0.77967200  |
| H  | -4.96534100 | 0.42537300  | 0.69570500  |
| H  | -5.24942100 | 1.98028200  | -3.31089900 |
| H  | -7.73311900 | 1.74259500  | -3.22492700 |
| H  | -8.81756900 | 0.83845800  | -1.18221200 |
| S  | -3.18847000 | 1.33142500  | -1.40757000 |
| O  | -2.85422300 | 2.37467100  | -2.39687000 |
| O  | -2.68478900 | 1.45221700  | -0.02021900 |
| C  | -2.61119100 | -0.24892600 | -2.10529300 |
| H  | -3.15358300 | -0.35818800 | -3.04982400 |
| C  | -2.77499500 | -1.47849700 | -1.21152200 |
| H  | -3.84306200 | -1.61822300 | -0.95574900 |
| H  | -2.49754200 | -2.33977600 | -1.83244100 |
| H  | -1.55368600 | -0.07116700 | -2.32280800 |
| H  | 1.07497700  | -2.48798200 | 0.19088400  |
| N  | 2.64146900  | -1.66454200 | -0.71640200 |
| Si | 2.55772500  | -2.06461800 | -2.40227700 |
| Si | 3.83107800  | -2.22848100 | 0.43388700  |
| C  | 5.59646800  | -1.61933700 | 0.04042700  |
| H  | 6.30340500  | -1.92616300 | 0.82325200  |
| H  | 5.96327500  | -2.02702000 | -0.91004900 |
| H  | 5.63539600  | -0.52550700 | -0.03573400 |
| C  | 3.37696800  | -1.61544900 | 2.17085400  |
| H  | 3.38053100  | -0.52057100 | 2.24335300  |
| H  | 2.37673500  | -1.97417600 | 2.43924700  |
| H  | 4.08650900  | -1.99967800 | 2.91637600  |
| C  | 3.91695100  | -4.12561800 | 0.53569900  |
| H  | 4.32495800  | -4.58652200 | -0.37072800 |
| H  | 4.55711000  | -4.42888300 | 1.37497500  |
| H  | 2.91742000  | -4.53925600 | 0.70895900  |
| C  | 3.91274700  | -1.24495700 | -3.46542600 |
| H  | 3.79190800  | -1.49300300 | -4.52877200 |
| H  | 3.87941700  | -0.15092600 | -3.37243500 |
| H  | 4.91642000  | -1.56761300 | -3.16200800 |
| C  | 2.64712000  | -3.93515600 | -2.75097100 |
| H  | 2.39964500  | -4.13713000 | -3.80179300 |
| H  | 3.64645200  | -4.34697100 | -2.56832500 |
| H  | 1.94255000  | -4.49841000 | -2.12720900 |
| C  | 0.89443000  | -1.47680600 | -3.12608500 |
| H  | 0.05487000  | -1.91908100 | -2.57726400 |
| H  | 0.79380600  | -0.38493400 | -3.06352100 |
| H  | 0.79866000  | -1.75854300 | -4.18287200 |

**ADD1'**

|    |             |             |             |
|----|-------------|-------------|-------------|
| Ag | -1.29426600 | -0.25126300 | -0.32193000 |
| P  | -1.50727300 | -2.59219200 | -0.71636600 |
| C  | -3.21581200 | -3.25880000 | -1.05553500 |
| H  | -3.09863500 | -4.27792200 | -1.44919200 |
| H  | -3.62660900 | -2.65191600 | -1.87184500 |
| C  | -4.19087700 | -3.28092200 | 0.13570900  |
| H  | -5.16026200 | -3.66058100 | -0.21673100 |
| H  | -3.83378900 | -3.99465400 | 0.88919000  |
| P  | -4.43942100 | -1.64366300 | 1.03147300  |
| C  | -0.86936000 | -3.66383300 | 0.64492100  |
| H  | -1.01279800 | -4.72693800 | 0.41967200  |
| H  | 0.19858200  | -3.46734300 | 0.78164000  |
| H  | -1.37877700 | -3.41741300 | 1.58067700  |
| C  | -0.57289900 | -3.19798900 | -2.19172600 |
| H  | -0.95276400 | -2.71065000 | -3.09523100 |
| H  | 0.48388900  | -2.93515800 | -2.08549600 |
| H  | -0.66435700 | -4.28428600 | -2.30539600 |
| C  | -5.83210400 | -2.17166900 | 2.15450400  |
| H  | -6.21558400 | -1.29561100 | 2.68800200  |
| H  | -6.66148900 | -2.64318200 | 1.61239200  |
| H  | -5.45529900 | -2.87553100 | 2.90447800  |
| C  | -5.40846700 | -0.69915100 | -0.25030700 |
| H  | -4.74524200 | -0.37095100 | -1.05723500 |
| H  | -6.23476900 | -1.28263700 | -0.67623900 |
| H  | -5.81985300 | 0.20389800  | 0.21340800  |
| C  | 2.84318200  | 1.68342700  | 0.16774200  |
| H  | 2.69502300  | 2.55565400  | -0.49078500 |
| H  | 2.95772900  | 2.06390900  | 1.19710300  |
| C  | 4.12362700  | 0.95008600  | -0.26601800 |
| H  | 4.95269500  | 1.66873200  | -0.21881900 |
| O  | 1.75337100  | 0.78259000  | 0.06901500  |
| N  | 4.04256500  | 0.45066800  | -1.64760800 |
| H  | 3.11621000  | 0.03521400  | -1.75806300 |
| C  | 4.44592600  | -0.22186800 | 0.69399200  |
| H  | 4.26561900  | 0.11362500  | 1.72292500  |
| H  | 3.72070500  | -1.02200000 | 0.50031500  |
| C  | 5.86155500  | -0.74950000 | 0.58896900  |
| C  | 6.28243600  | -1.51377500 | -0.51082400 |
| C  | 6.79332200  | -0.47835200 | 1.60081300  |
| C  | 7.59203100  | -1.98825100 | -0.59186800 |
| H  | 5.57827100  | -1.71184100 | -1.31202600 |
| C  | 8.10506800  | -0.95192300 | 1.52370600  |
| H  | 6.48500600  | 0.10853700  | 2.46405600  |
| C  | 8.50936400  | -1.71104300 | 0.42501600  |
| H  | 7.89801400  | -2.57804000 | -1.45285200 |
| H  | 8.80768800  | -0.73001200 | 2.32338500  |
| H  | 9.52832700  | -2.08467300 | 0.36163000  |
| H  | 4.07568400  | 1.23645600  | -2.29674700 |

|    |             |            |             |
|----|-------------|------------|-------------|
| H  | 0.88975500  | 1.27302200 | 0.05096000  |
| N  | -0.92449600 | 1.82020200 | -0.03984000 |
| Si | -1.11311300 | 2.71513400 | -1.51828400 |
| Si | -1.27721900 | 2.36631700 | 1.57672100  |
| C  | -1.07921900 | 0.92390200 | 2.79929500  |
| H  | -0.08858100 | 0.46137100 | 2.70273600  |
| H  | -1.18354900 | 1.27342600 | 3.83535400  |
| H  | -1.83598300 | 0.14524000 | 2.63666500  |
| C  | -0.08366600 | 3.73096700 | 2.15622300  |
| H  | 0.95734400  | 3.38584000 | 2.12668300  |
| H  | -0.14846700 | 4.63586300 | 1.54177600  |
| H  | -0.30482700 | 4.01949900 | 3.19249600  |
| C  | -3.04643900 | 3.04436200 | 1.77211200  |
| H  | -3.78894500 | 2.29481300 | 1.46979800  |
| H  | -3.25559700 | 3.32084500 | 2.81398600  |
| H  | -3.21064200 | 3.93771400 | 1.15627400  |
| C  | -0.08910000 | 1.89828500 | -2.89938000 |
| H  | -0.10828500 | 2.50037100 | -3.81733400 |
| H  | 0.95684400  | 1.77062300 | -2.59628700 |
| H  | -0.47838800 | 0.90222700 | -3.15123800 |
| C  | -2.91444400 | 2.77562400 | -2.13767000 |
| H  | -2.99926700 | 3.32842600 | -3.08295700 |
| H  | -3.30417200 | 1.76316200 | -2.31023700 |
| H  | -3.57443300 | 3.25986800 | -1.40774900 |
| C  | -0.52001200 | 4.51721300 | -1.36885400 |
| H  | -1.13469200 | 5.09633500 | -0.66898700 |
| H  | 0.51825200  | 4.57464000 | -1.02033700 |
| H  | -0.57215400 | 5.02133300 | -2.34274300 |

#### TS1'-N

|    |             |             |             |
|----|-------------|-------------|-------------|
| Ag | 2.17576900  | -0.29640500 | 0.24298600  |
| P  | 1.69852600  | -2.64243200 | 0.22960900  |
| C  | 3.19046000  | -3.75472300 | 0.06815300  |
| H  | 2.84969800  | -4.77560200 | 0.29040200  |
| H  | 3.88141200  | -3.47532600 | 0.87325000  |
| C  | 3.91790800  | -3.75206300 | -1.28763100 |
| H  | 4.73020200  | -4.49196000 | -1.24721200 |
| H  | 3.23104000  | -4.08767900 | -2.07548100 |
| P  | 4.61133900  | -2.09523500 | -1.84552100 |
| C  | 0.56171200  | -3.22873800 | -1.09688100 |
| H  | 0.46189000  | -4.32042500 | -1.07163400 |
| H  | -0.41865300 | -2.76931600 | -0.93435200 |
| H  | 0.93839600  | -2.92101100 | -2.07697400 |
| C  | 0.93161100  | -3.29394800 | 1.77536200  |
| H  | 1.55183800  | -3.02574700 | 2.63690100  |
| H  | -0.06706900 | -2.86760600 | 1.91256200  |
| H  | 0.84022300  | -4.38561100 | 1.72897400  |
| C  | 5.57138800  | -2.69603100 | -3.32869100 |
| H  | 6.16883000  | -1.86991300 | -3.72877000 |

|   |             |             |             |
|---|-------------|-------------|-------------|
| H | 6.24212400  | -3.53206600 | -3.09271900 |
| H | 4.87710700  | -3.01226200 | -4.11477200 |
| C | 6.01348700  | -1.89967100 | -0.63143100 |
| H | 5.62401800  | -1.62123200 | 0.35312700  |
| H | 6.62056000  | -2.80907100 | -0.53439600 |
| H | 6.66019200  | -1.08082100 | -0.96466200 |
| C | -0.83619000 | 3.04927300  | 0.87262700  |
| H | -0.61555200 | 2.71960100  | 1.89860300  |
| H | -0.62486800 | 4.13017300  | 0.81461100  |
| C | -2.32844200 | 2.81853500  | 0.59292800  |
| H | -2.91975900 | 3.28363500  | 1.39162400  |
| O | -0.10694500 | 2.31239900  | -0.08009100 |
| N | -2.53974800 | 1.35513500  | 0.69643900  |
| H | -1.94505800 | 0.86725600  | 0.01804200  |
| C | -2.73409600 | 3.41555100  | -0.77505500 |
| H | -2.41752900 | 4.46776000  | -0.76007100 |
| H | -2.13467800 | 2.92685000  | -1.54984500 |
| C | -4.20700900 | 3.34497900  | -1.12190400 |
| C | -4.65992000 | 2.54471200  | -2.17921800 |
| C | -5.15294800 | 4.09136100  | -0.40225800 |
| C | -6.01736900 | 2.47965000  | -2.50264000 |
| H | -3.93939600 | 1.97122100  | -2.75839400 |
| C | -6.51013000 | 4.02798700  | -0.71938100 |
| H | -4.82274700 | 4.73635500  | 0.40984600  |
| C | -6.94783300 | 3.21860200  | -1.77090700 |
| H | -6.34567200 | 1.85393200  | -3.32851200 |
| H | -7.22554900 | 4.61586500  | -0.15016100 |
| H | -8.00418000 | 3.17068200  | -2.02094000 |
| C | -5.77188500 | -3.45006900 | -1.39198900 |
| C | -4.67810600 | -2.73845300 | -0.89439100 |
| C | -4.36333100 | -2.82951600 | 0.46361000  |
| C | -5.12097300 | -3.62905300 | 1.32451700  |
| C | -6.21173600 | -4.33551200 | 0.81815900  |
| C | -6.54039000 | -4.24362300 | -0.53763000 |
| H | -6.01873000 | -3.38973300 | -2.44864900 |
| H | -4.05523700 | -2.13664700 | -1.54760700 |
| H | -4.84067900 | -3.70869100 | 2.37012100  |
| H | -6.80145600 | -4.96397300 | 1.48010400  |
| H | -7.39018800 | -4.79684000 | -0.92841000 |
| S | -2.98930000 | -1.86163100 | 1.14068700  |
| O | -2.41570600 | -2.68384200 | 2.22904500  |
| O | -2.13517500 | -1.51680400 | -0.03665300 |
| C | -3.57056600 | -0.35923300 | 1.79268700  |
| H | -4.26022100 | -0.51958300 | 2.61982500  |
| C | -3.90887300 | 0.70235900  | 0.75462300  |
| H | -4.24290600 | 0.38394000  | -0.23478100 |
| H | -4.62026300 | 1.42891000  | 1.15172200  |
| H | -2.40990300 | 0.63936700  | 1.73249900  |
| H | 0.84402600  | 2.17596900  | 0.21608800  |
| N | 2.59699000  | 1.79381400  | 0.44336400  |

|    |            |            |             |
|----|------------|------------|-------------|
| Si | 3.18793200 | 2.10405100 | 2.05104600  |
| Si | 3.19809000 | 2.53655800 | -1.02095000 |
| C  | 2.42501100 | 1.68507100 | -2.53136000 |
| H  | 1.33056100 | 1.69498700 | -2.46000400 |
| H  | 2.70560200 | 2.20174400 | -3.45923400 |
| H  | 2.75459300 | 0.64202200 | -2.61965200 |
| C  | 2.72307400 | 4.37700700 | -1.12645000 |
| H  | 1.63502500 | 4.49829300 | -1.05989300 |
| H  | 3.17583500 | 4.97648300 | -0.32867600 |
| H  | 3.04608300 | 4.80469000 | -2.08496700 |
| C  | 5.09179100 | 2.43420300 | -1.20571900 |
| H  | 5.43483700 | 1.39265000 | -1.17022500 |
| H  | 5.41558400 | 2.85926600 | -2.16513700 |
| H  | 5.61439000 | 2.98256400 | -0.41179800 |
| C  | 1.94353500 | 1.48026300 | 3.34910100  |
| H  | 2.34319400 | 1.61094300 | 4.36357100  |
| H  | 0.99224100 | 2.02407600 | 3.29877700  |
| H  | 1.71648600 | 0.41416100 | 3.21815000  |
| C  | 4.83704400 | 1.22424600 | 2.42832300  |
| H  | 5.19059400 | 1.45082900 | 3.44323400  |
| H  | 4.72801200 | 0.13387500 | 2.35198800  |
| H  | 5.62368300 | 1.52469500 | 1.72575100  |
| C  | 3.46704000 | 3.95480600 | 2.40354300  |
| H  | 4.27732600 | 4.37347400 | 1.79446000  |
| H  | 2.56650100 | 4.54866200 | 2.20573300  |
| H  | 3.73987400 | 4.10531000 | 3.45639000  |

#### ADD2'-N

|    |             |             |             |
|----|-------------|-------------|-------------|
| Ag | 2.33933800  | -0.26734700 | 0.26036500  |
| P  | 1.73629300  | -2.57491900 | 0.38967100  |
| C  | 3.14095800  | -3.80289300 | 0.36010100  |
| H  | 2.72479800  | -4.77408800 | 0.66253500  |
| H  | 3.83894500  | -3.50201900 | 1.15116900  |
| C  | 3.88582800  | -3.96650600 | -0.97713700 |
| H  | 4.67159500  | -4.72429900 | -0.84634800 |
| H  | 3.19688800  | -4.35980900 | -1.73587300 |
| P  | 4.63980300  | -2.39972800 | -1.69963800 |
| C  | 0.59429900  | -3.17363500 | -0.92913800 |
| H  | 0.44764600  | -4.25804600 | -0.85900900 |
| H  | -0.37026200 | -2.67450100 | -0.79875900 |
| H  | 0.99527400  | -2.92297100 | -1.91545500 |
| C  | 0.86276200  | -3.05047700 | 1.94456700  |
| H  | 1.48138400  | -2.79873400 | 2.81175400  |
| H  | -0.07746600 | -2.49681700 | 2.00866500  |
| H  | 0.63984700  | -4.12361300 | 1.96071400  |
| C  | 5.60430400  | -3.19166400 | -3.08782000 |
| H  | 6.24145100  | -2.43610600 | -3.55989900 |
| H  | 6.23658100  | -4.02233200 | -2.74901800 |
| H  | 4.91327000  | -3.56409600 | -3.85192500 |



|    |             |             |             |
|----|-------------|-------------|-------------|
| C  | 6.02449800  | -2.11026800 | -0.48513600 |
| H  | 5.62477400  | -1.71518800 | 0.45445000  |
| H  | 6.60358700  | -3.01917800 | -0.27662900 |
| H  | 6.69960000  | -1.34952700 | -0.89192800 |
| C  | -0.74310000 | 2.98592100  | 0.74883900  |
| H  | -0.45741000 | 2.84616500  | 1.80088600  |
| H  | -0.55900300 | 4.04023400  | 0.47934600  |
| C  | -2.24140600 | 2.67662800  | 0.61242800  |
| H  | -2.78017900 | 3.34746000  | 1.29837700  |
| O  | -0.03315800 | 2.10499600  | -0.10119400 |
| N  | -2.43858200 | 1.31166100  | 1.09354100  |
| H  | -1.88374600 | 0.66346300  | 0.54028300  |
| C  | -2.69992300 | 2.98810800  | -0.84405800 |
| H  | -2.33741100 | 3.99802000  | -1.08507100 |
| H  | -2.17028900 | 2.30719800  | -1.51858700 |
| C  | -4.18930000 | 2.93502600  | -1.11280100 |
| C  | -4.72238300 | 2.03832900  | -2.05016600 |
| C  | -5.07679800 | 3.80121000  | -0.45444300 |
| C  | -6.09375200 | 1.99334300  | -2.31131000 |
| H  | -4.04829000 | 1.37306500  | -2.58615300 |
| C  | -6.44799800 | 3.76017600  | -0.70972000 |
| H  | -4.68776200 | 4.52213200  | 0.26165100  |
| C  | -6.96383000 | 2.85230000  | -1.63802600 |
| H  | -6.48171100 | 1.29071800  | -3.04493700 |
| H  | -7.11456900 | 4.44248500  | -0.18793500 |
| H  | -8.03129900 | 2.82167100  | -1.83983900 |
| C  | -5.82619500 | -2.35567100 | -1.75254500 |
| C  | -4.73437500 | -1.97830600 | -0.96963800 |
| C  | -4.65864900 | -2.43612600 | 0.34735100  |
| C  | -5.63878200 | -3.26998200 | 0.89027200  |
| C  | -6.72432800 | -3.64063600 | 0.09668700  |
| C  | -6.81907300 | -3.18083000 | -1.21949200 |
| H  | -5.89788300 | -2.00863800 | -2.77897100 |
| H  | -3.94511400 | -1.35296600 | -1.37207700 |
| H  | -5.53441500 | -3.63429200 | 1.90701300  |
| H  | -7.49174100 | -4.29278700 | 0.50318500  |
| H  | -7.66652800 | -3.47223500 | -1.83354300 |
| S  | -3.26139000 | -1.95686100 | 1.37826000  |
| O  | -3.09821100 | -2.98227000 | 2.42394700  |
| O  | -2.13203600 | -1.64636600 | 0.47041400  |
| C  | -3.78455100 | -0.41603500 | 2.20182000  |
| H  | -4.77155400 | -0.63731500 | 2.62103100  |
| C  | -3.78942800 | 0.82832200  | 1.30531400  |
| H  | -4.37076500 | 0.62288300  | 0.39166200  |
| H  | -4.35083100 | 1.60252600  | 1.84374300  |
| H  | -3.06323300 | -0.29416700 | 3.01657100  |
| H  | 0.93365600  | 2.09150300  | 0.13512800  |
| N  | 2.79655500  | 1.81158900  | 0.27915700  |
| Si | 3.40365100  | 2.29930700  | 1.83205800  |
| Si | 3.27375800  | 2.45205600  | -1.27180200 |

|   |            |            |             |
|---|------------|------------|-------------|
| C | 2.46962700 | 1.43810200 | -2.66236800 |
| H | 1.38146400 | 1.40163300 | -2.52689100 |
| H | 2.66990900 | 1.89253000 | -3.64227700 |
| H | 2.84839200 | 0.40799000 | -2.69114700 |
| C | 2.69034300 | 4.24896000 | -1.51231100 |
| H | 1.60149600 | 4.31802800 | -1.39685600 |
| H | 3.14617600 | 4.94140300 | -0.79576700 |
| H | 2.93931600 | 4.60563800 | -2.52069500 |
| C | 5.15918700 | 2.42892500 | -1.55159700 |
| H | 5.56076300 | 1.41328800 | -1.44038900 |
| H | 5.41532700 | 2.78126500 | -2.55970000 |
| H | 5.68627800 | 3.07266800 | -0.83584800 |
| C | 2.26536900 | 1.65333500 | 3.21496600  |
| H | 2.63623400 | 1.95879200 | 4.20254000  |
| H | 1.24294400 | 2.03575000 | 3.10872300  |
| H | 2.20371900 | 0.55652400 | 3.21078300  |
| C | 5.14467800 | 1.61968300 | 2.21175900  |
| H | 5.49798100 | 1.94278300 | 3.19999800  |
| H | 5.14691100 | 0.52132800 | 2.20092200  |
| H | 5.87824400 | 1.95528800 | 1.46843700  |
| C | 3.50038800 | 4.19089700 | 2.03506800  |
| H | 4.24253800 | 4.64134800 | 1.36502200  |
| H | 2.53609700 | 4.67099800 | 1.82805000  |
| H | 3.78776900 | 4.45158700 | 3.06246900  |

### TS1'-O

|    |             |            |             |
|----|-------------|------------|-------------|
| Ag | -0.06250600 | 1.73682900 | 0.38817200  |
| P  | 2.22273100  | 2.39653900 | 0.62305200  |
| C  | 2.50890300  | 4.23365200 | 0.81128500  |
| H  | 3.53019200  | 4.36209700 | 1.19577300  |
| H  | 1.83126100  | 4.57627200 | 1.60304900  |
| C  | 2.33518200  | 5.09408200 | -0.45282000 |
| H  | 2.54233000  | 6.14226000 | -0.19327300 |
| H  | 3.08588700  | 4.80441800 | -1.19912900 |
| P  | 0.66090200  | 4.97811600 | -1.30248800 |
| C  | 3.34427900  | 1.90850600 | -0.75608900 |
| H  | 4.36605000  | 2.26659900 | -0.58281500 |
| H  | 3.34409800  | 0.81682300 | -0.83271000 |
| H  | 2.97064400  | 2.31979200 | -1.69871900 |
| C  | 3.06710200  | 1.73947900 | 2.12583600  |
| H  | 2.50863700  | 2.03817700 | 3.01911400  |
| H  | 3.10096100  | 0.64615000 | 2.08373800  |
| H  | 4.09004200  | 2.12786300 | 2.19872100  |
| C  | 0.91992200  | 6.31500200 | -2.57946100 |
| H  | -0.02346000 | 6.49635800 | -3.10542000 |
| H  | 1.26546900  | 7.26113100 | -2.14381300 |
| H  | 1.65291600  | 5.98055600 | -3.32178300 |
| C  | -0.39064700 | 5.91692000 | -0.08246900 |
| H  | -0.59023400 | 5.29732800 | 0.79755700  |

|    |             |             |             |
|----|-------------|-------------|-------------|
| H  | 0.07269700  | 6.85952700  | 0.23634800  |
| H  | -1.35874500 | 6.13909500  | -0.54383000 |
| C  | -0.44266400 | -3.07541100 | -1.22918900 |
| H  | 0.09981800  | -2.13136600 | -1.34646700 |
| H  | -0.46486700 | -3.61614600 | -2.18004800 |
| C  | -1.85701900 | -2.86511800 | -0.66427700 |
| H  | -2.39101600 | -2.30137900 | -1.44017500 |
| O  | 0.32031600  | -3.92767300 | -0.30800500 |
| N  | -1.91731200 | -2.07162800 | 0.55247700  |
| H  | -1.23241000 | -2.36231100 | 1.24647500  |
| C  | -2.58439400 | -4.22456000 | -0.47483500 |
| H  | -2.34064200 | -4.88143700 | -1.32029800 |
| H  | -2.17391200 | -4.70655500 | 0.42093200  |
| C  | -4.08867800 | -4.09985700 | -0.36383100 |
| C  | -4.70057800 | -3.68122800 | 0.82719900  |
| C  | -4.90565000 | -4.39463400 | -1.46383300 |
| C  | -6.08813500 | -3.55999800 | 0.91129000  |
| H  | -4.08001000 | -3.43572600 | 1.68256900  |
| C  | -6.29462300 | -4.27453100 | -1.38342000 |
| H  | -4.44916700 | -4.72721700 | -2.39445900 |
| C  | -6.89071900 | -3.85644700 | -0.19314700 |
| H  | -6.54352100 | -3.23321000 | 1.84265700  |
| H  | -6.90850200 | -4.51071600 | -2.24901400 |
| H  | -7.97151600 | -3.76350700 | -0.12531000 |
| C  | 6.72353800  | -2.98062000 | -1.66671200 |
| C  | 5.41815400  | -2.62478300 | -1.32228400 |
| C  | 5.03604900  | -2.64909000 | 0.02089300  |
| C  | 5.94132100  | -3.01269300 | 1.02156900  |
| C  | 7.24260100  | -3.36894000 | 0.66655900  |
| C  | 7.63307100  | -3.35669400 | -0.67546300 |
| H  | 7.03136100  | -2.95721600 | -2.70856600 |
| H  | 4.70553500  | -2.30839600 | -2.07676600 |
| H  | 5.63087600  | -2.99469800 | 2.06139700  |
| H  | 7.95419500  | -3.64871300 | 1.43853900  |
| H  | 8.64828700  | -3.63267700 | -0.94718200 |
| S  | 3.33359900  | -2.23784600 | 0.47851200  |
| O  | 3.41713200  | -1.61829900 | 1.81828000  |
| O  | 2.78468900  | -1.45772000 | -0.66389200 |
| C  | 2.40833700  | -3.70367500 | 0.60589200  |
| H  | 2.78040600  | -4.37785100 | 1.37216100  |
| C  | 1.83440900  | -4.26144100 | -0.62982800 |
| H  | 2.05869300  | -3.73761500 | -1.55866400 |
| H  | 1.84053500  | -5.34418900 | -0.74374400 |
| H  | -1.82776000 | -1.06303300 | 0.39134000  |
| H  | 0.82291200  | -3.42731300 | 0.57716100  |
| N  | -2.10357400 | 1.18298500  | 0.30116500  |
| Si | -2.85735100 | 1.37669900  | 1.85160400  |
| Si | -2.80433400 | 1.42110200  | -1.26562900 |
| C  | -1.52389200 | 0.99216000  | -2.61218200 |
| H  | -1.13112900 | -0.02591000 | -2.48828300 |

|   |             |             |             |
|---|-------------|-------------|-------------|
| H | -1.96831600 | 1.05633400  | -3.61462800 |
| H | -0.66997800 | 1.68158500  | -2.58517100 |
| C | -4.32986300 | 0.32953700  | -1.59617600 |
| H | -4.15110800 | -0.72690500 | -1.36409800 |
| H | -5.19462600 | 0.64361300  | -1.00153300 |
| H | -4.61917700 | 0.39533300  | -2.65381600 |
| C | -3.35612200 | 3.21676000  | -1.59284000 |
| H | -2.50812200 | 3.90580000  | -1.49391900 |
| H | -3.77092800 | 3.33718900  | -2.60271900 |
| H | -4.12724600 | 3.53402000  | -0.87899000 |
| C | -1.95268100 | 0.33670800  | 3.16568200  |
| H | -2.35116500 | 0.53714200  | 4.16918100  |
| H | -2.07621000 | -0.73471700 | 2.96715100  |
| H | -0.87564600 | 0.55155900  | 3.18838100  |
| C | -2.81747400 | 3.18196500  | 2.47502900  |
| H | -3.32535000 | 3.28840200  | 3.44327800  |
| H | -1.78451800 | 3.53435000  | 2.60346800  |
| H | -3.30896100 | 3.85807500  | 1.76386000  |
| C | -4.68126000 | 0.83489900  | 1.89115400  |
| H | -5.32225700 | 1.47881300  | 1.27654500  |
| H | -4.80198900 | -0.19490600 | 1.53622200  |
| H | -5.06372700 | 0.88292100  | 2.91961600  |

#### TS1-O-Cu-Bu

|   |             |             |             |
|---|-------------|-------------|-------------|
| P | 0.94658700  | 1.17153400  | 1.59387500  |
| C | -0.20866700 | 2.63436600  | 1.43713900  |
| H | -0.00578500 | 3.31192100  | 2.27822100  |
| H | -1.22968800 | 2.25816000  | 1.58145700  |
| C | -0.09744100 | 3.40841300  | 0.10687600  |
| H | -0.47720600 | 4.42993800  | 0.24784500  |
| H | 0.95493300  | 3.51110900  | -0.18815600 |
| P | -1.00304400 | 2.62755400  | -1.34666200 |
| C | 2.56531900  | 2.02223000  | 1.91074800  |
| H | 2.49490400  | 2.74408800  | 2.73340900  |
| H | 3.31877600  | 1.26799700  | 2.15713600  |
| H | 2.90182400  | 2.54023500  | 1.00729200  |
| C | 0.52305400  | 0.57075100  | 3.29622100  |
| H | -0.49296600 | 0.16354600  | 3.30489600  |
| H | 1.20837300  | -0.23764800 | 3.56901000  |
| H | 0.59393200  | 1.37080500  | 4.04284800  |
| C | -0.52895900 | 3.86855300  | -2.65698000 |
| H | -1.11240300 | 3.67850700  | -3.56426400 |
| H | -0.69896400 | 4.90603500  | -2.34258800 |
| H | 0.52925400  | 3.74702000  | -2.91236400 |
| C | -2.73917300 | 3.21486800  | -0.98657700 |
| H | -2.78674100 | 4.28592000  | -0.75150400 |
| H | -3.37036600 | 3.01954600  | -1.86047400 |
| H | -3.16243500 | 2.64680200  | -0.15154100 |
| H | 2.02340900  | -1.93370500 | -0.24972800 |

|    |             |             |             |
|----|-------------|-------------|-------------|
| C  | 0.50747300  | -3.31597300 | -0.64716900 |
| H  | 1.00579400  | -3.33312900 | -1.63817600 |
| H  | 0.29095800  | -4.36723200 | -0.39080300 |
| C  | -0.84337000 | -2.58578900 | -0.82733100 |
| H  | -1.40469700 | -3.07743900 | -1.63890700 |
| O  | 1.31627300  | -2.71988300 | 0.31618200  |
| N  | -0.55582900 | -1.17231500 | -1.18660100 |
| H  | -0.19988600 | -1.12375000 | -2.14090600 |
| H  | -1.40186200 | -0.60377400 | -1.16665300 |
| C  | -1.68920600 | -2.64179700 | 0.45825500  |
| H  | -1.83528900 | -3.70234700 | 0.70088500  |
| H  | -1.09757100 | -2.20839600 | 1.27116000  |
| C  | -3.03535600 | -1.95496800 | 0.35231500  |
| C  | -3.28183800 | -0.73487100 | 0.99782200  |
| C  | -4.07381100 | -2.52032800 | -0.40549700 |
| C  | -4.52142500 | -0.09741500 | 0.89185900  |
| H  | -2.49379700 | -0.28934000 | 1.60090100  |
| C  | -5.31162200 | -1.88758200 | -0.51791700 |
| H  | -3.90981700 | -3.47240100 | -0.90616400 |
| C  | -5.54053100 | -0.67096900 | 0.13079600  |
| H  | -4.69346200 | 0.84128200  | 1.41328900  |
| H  | -6.10153800 | -2.34743500 | -1.10633500 |
| H  | -6.50671400 | -0.18029300 | 0.04931300  |
| Cu | 0.98058200  | -0.36893800 | 0.02045400  |
| C  | 2.88692400  | -1.00638100 | -1.00717200 |
| H  | 2.90210200  | -1.58614900 | -1.94660900 |
| H  | 2.75690700  | 0.04138800  | -1.34672200 |
| C  | 4.25477000  | -1.12290500 | -0.31556000 |
| H  | 4.25680500  | -0.51522700 | 0.60384700  |
| H  | 4.40341100  | -2.15967000 | 0.02352400  |
| C  | 5.46336300  | -0.71082300 | -1.17285500 |
| H  | 5.33099500  | 0.33058000  | -1.50369700 |
| H  | 5.47378900  | -1.31896900 | -2.08929700 |
| C  | 6.80925400  | -0.85126800 | -0.45123900 |
| H  | 6.98283200  | -1.88876000 | -0.13842000 |
| H  | 7.64881500  | -0.55187500 | -1.09079900 |
| H  | 6.84142300  | -0.22785900 | 0.45205000  |

### TS1-O-Cu-HMDS

|   |             |            |             |
|---|-------------|------------|-------------|
| P | 0.21697000  | 1.59546000 | 1.90716800  |
| C | -0.72603400 | 3.00602900 | 1.12990100  |
| H | -1.38880400 | 3.41652900 | 1.90484000  |
| H | -1.36688200 | 2.54022100 | 0.37062500  |
| C | 0.11056500  | 4.15329600 | 0.53609500  |
| H | -0.57410700 | 4.90659100 | 0.12017000  |
| H | 0.67381700  | 4.65413300 | 1.33444900  |
| P | 1.36420000  | 3.66351600 | -0.77590100 |
| C | 1.36600500  | 2.43363100 | 3.09222400  |
| H | 0.84717300  | 3.18050100 | 3.70515600  |

|    |             |             |             |
|----|-------------|-------------|-------------|
| H  | 1.80948000  | 1.68072000  | 3.75164000  |
| H  | 2.17755100  | 2.91757800  | 2.54113500  |
| C  | -1.07749100 | 0.90600900  | 3.03727800  |
| H  | -1.89379400 | 0.50214900  | 2.43092400  |
| H  | -0.65824800 | 0.08667700  | 3.62897400  |
| H  | -1.47235300 | 1.67387700  | 3.71283800  |
| C  | 1.93827500  | 5.37475300  | -1.25123600 |
| H  | 2.58233100  | 5.30694500  | -2.13455400 |
| H  | 1.10619500  | 6.05434600  | -1.47558900 |
| H  | 2.53510000  | 5.80476700  | -0.43950400 |
| C  | 0.21068000  | 3.31721900  | -2.19899500 |
| H  | -0.51052600 | 4.12931300  | -2.35823900 |
| H  | 0.79325600  | 3.17779400  | -3.11570100 |
| H  | -0.33243600 | 2.38759600  | -2.00452400 |
| N  | 2.07850900  | -1.53323800 | -0.19775400 |
| H  | 0.91274500  | -1.57981900 | -0.67695500 |
| Si | 3.31822900  | -0.99821600 | -1.32728000 |
| Si | 2.27590700  | -2.86948900 | 0.93621800  |
| C  | 3.94875600  | -2.80534100 | 1.83354300  |
| H  | 4.01987100  | -3.61763200 | 2.56865000  |
| H  | 4.79865500  | -2.90993300 | 1.14855500  |
| H  | 4.07349500  | -1.85844400 | 2.37352900  |
| C  | 0.90855400  | -2.80381100 | 2.24937800  |
| H  | 1.04490600  | -1.95239700 | 2.92901800  |
| H  | -0.07471000 | -2.70598600 | 1.77549900  |
| H  | 0.90603900  | -3.71705000 | 2.85910700  |
| C  | 2.12071100  | -4.53955700 | 0.04720700  |
| H  | 2.90463700  | -4.68279900 | -0.70492200 |
| H  | 2.18457400  | -5.37378900 | 0.75799800  |
| H  | 1.15287600  | -4.61335700 | -0.46427900 |
| C  | 4.25186000  | -2.44365500 | -2.13875200 |
| H  | 4.97773100  | -2.06030000 | -2.86796600 |
| H  | 4.80918200  | -3.04773300 | -1.41264800 |
| H  | 3.56960000  | -3.11484400 | -2.67430200 |
| C  | 2.49073700  | -0.01297600 | -2.71832500 |
| H  | 3.24031900  | 0.35593700  | -3.43048800 |
| H  | 1.77285100  | -0.62642600 | -3.27541900 |
| H  | 1.95405200  | 0.85575500  | -2.32034400 |
| C  | 4.60052000  | 0.11928600  | -0.48740900 |
| H  | 4.12642600  | 1.02836500  | -0.09760900 |
| H  | 5.09496700  | -0.38677000 | 0.35002300  |
| H  | 5.37988400  | 0.42667300  | -1.19723700 |
| C  | -1.05951800 | -1.13301200 | -1.81512300 |
| H  | -0.61421500 | -0.42818900 | -2.54730000 |
| H  | -1.11770500 | -2.11175400 | -2.32964100 |
| C  | -2.51611200 | -0.68227200 | -1.57767500 |
| H  | -3.06155700 | -0.89781600 | -2.51684500 |
| O  | -0.30686900 | -1.23600600 | -0.64913400 |
| N  | -2.58059700 | 0.75667100  | -1.25004400 |
| H  | -2.31111500 | 1.28745300  | -2.07786200 |

|    |             |             |             |
|----|-------------|-------------|-------------|
| H  | -3.55243400 | 1.00867900  | -1.06648200 |
| C  | -3.18130300 | -1.50540300 | -0.45735600 |
| H  | -3.03152900 | -2.56707900 | -0.69074200 |
| H  | -2.63939900 | -1.30635400 | 0.47166100  |
| C  | -4.65946600 | -1.22290000 | -0.29050600 |
| C  | -5.12834800 | -0.35369200 | 0.70583400  |
| C  | -5.60346800 | -1.80707400 | -1.15035200 |
| C  | -6.49065800 | -0.07205300 | 0.83794700  |
| H  | -4.41542100 | 0.09973100  | 1.39136100  |
| C  | -6.96479300 | -1.53139800 | -1.02242600 |
| H  | -5.26362200 | -2.49175200 | -1.92476100 |
| C  | -7.41454600 | -0.66009500 | -0.02679400 |
| H  | -6.82927600 | 0.60177200  | 1.62121300  |
| H  | -7.67655100 | -2.00093900 | -1.69691500 |
| H  | -8.47523600 | -0.44697700 | 0.07645700  |
| Cu | 0.99988900  | 0.01997800  | 0.60357900  |

**ADD1-OAc**

|    |             |             |             |
|----|-------------|-------------|-------------|
| Ag | 0.69127500  | 0.18584700  | -0.19950400 |
| P  | 2.04227600  | 2.17140300  | 0.76954600  |
| C  | 3.63348100  | 2.04487700  | -0.21514400 |
| H  | 4.44495200  | 2.53881600  | 0.33629700  |
| H  | 3.48289000  | 2.62194400  | -1.13778400 |
| C  | 4.03196700  | 0.59482100  | -0.55138900 |
| H  | 5.00397200  | 0.57893700  | -1.06289300 |
| H  | 4.13844900  | 0.01079600  | 0.37046900  |
| P  | 2.75924200  | -0.31220800 | -1.58231300 |
| C  | -1.50506400 | -2.43934100 | -1.30083300 |
| H  | -0.46334500 | -2.19807900 | -1.57393900 |
| H  | -1.97446500 | -2.90915200 | -2.17411700 |
| C  | -2.24117500 | -1.11906800 | -1.00883600 |
| H  | -2.21837300 | -0.51492600 | -1.92654100 |
| O  | -1.57134900 | -3.37733500 | -0.25249100 |
| N  | -1.50790200 | -0.35876500 | 0.03153000  |
| H  | -1.32961900 | -0.95883900 | 0.85157500  |
| C  | -3.71863800 | -1.38311500 | -0.62462100 |
| H  | -4.18628600 | -1.93097500 | -1.45367800 |
| H  | -3.72690300 | -2.05453800 | 0.24031100  |
| C  | -4.50541100 | -0.12335700 | -0.33663700 |
| C  | -4.73212800 | 0.30498700  | 0.98001400  |
| C  | -5.00017300 | 0.66994600  | -1.38416600 |
| C  | -5.42610100 | 1.48929200  | 1.24336000  |
| H  | -4.37198600 | -0.30433300 | 1.80619300  |
| C  | -5.69450200 | 1.85195200  | -1.12661900 |
| H  | -4.84430500 | 0.35076800  | -2.41287400 |
| C  | -5.90872700 | 2.26743700  | 0.19043600  |
| H  | -5.59427900 | 1.79803500  | 2.27198900  |
| H  | -6.07373200 | 2.44695400  | -1.95369500 |
| H  | -6.45253900 | 3.18641900  | 0.39253200  |

|   |             |             |             |
|---|-------------|-------------|-------------|
| H | -2.06869200 | 0.43521900  | 0.33774000  |
| O | 1.74687100  | -1.27923700 | 1.47500300  |
| C | 0.96755400  | -2.08330400 | 2.07299700  |
| C | 1.58416300  | -3.01325600 | 3.12251900  |
| H | 2.65823900  | -2.84550200 | 3.23308100  |
| H | 1.08642700  | -2.85827600 | 4.08623500  |
| H | 1.40363200  | -4.05562900 | 2.83622300  |
| O | -0.27938400 | -2.19073000 | 1.88761400  |
| H | -1.04139200 | -3.04615500 | 0.50949900  |
| C | 3.41476200  | -2.03980700 | -1.51877800 |
| C | 3.19961300  | 0.22500500  | -3.30633800 |
| C | 2.60472200  | 1.78317400  | 2.49010400  |
| C | 1.82767100  | 4.01642300  | 0.82950500  |
| H | 2.75051700  | 0.70166400  | 2.56696000  |
| H | 3.52315800  | 2.31728700  | 2.76274300  |
| H | 1.81120400  | 2.06082600  | 3.19236600  |
| H | 1.58280700  | 4.39331500  | -0.16897900 |
| H | 0.99390400  | 4.26147000  | 1.49535800  |
| H | 2.72891300  | 4.52616300  | 1.19133100  |
| H | 2.58265100  | -0.32203200 | -4.02672000 |
| H | 2.98868000  | 1.29230900  | -3.43053500 |
| H | 4.25677700  | 0.04206300  | -3.53465400 |
| H | 2.85369700  | -2.67241200 | -2.21408700 |
| H | 4.48039700  | -2.08778600 | -1.77286000 |
| H | 3.25607600  | -2.41730300 | -0.50452500 |

### TS1-N-OAc

|    |             |             |             |
|----|-------------|-------------|-------------|
| Ag | -2.12294700 | 0.04517300  | 0.04737700  |
| P  | -2.27931100 | -2.39528200 | -0.31042600 |
| C  | -4.12811700 | -2.68963200 | -0.41991900 |
| H  | -4.33583800 | -3.75853400 | -0.27772800 |
| H  | -4.42352800 | -2.44746400 | -1.44931000 |
| C  | -4.96078400 | -1.85713500 | 0.57608100  |
| H  | -6.02525200 | -2.10958200 | 0.47745400  |
| H  | -4.67212600 | -2.10799800 | 1.60554700  |
| P  | -4.73069200 | -0.00334400 | 0.39800300  |
| C  | -1.75935700 | -3.45154800 | 1.11256800  |
| H  | -2.02766800 | -4.50284200 | 0.95387800  |
| H  | -0.67524400 | -3.35349100 | 1.22288100  |
| H  | -2.22892000 | -3.09355100 | 2.03464800  |
| C  | -1.65750500 | -3.33480700 | -1.77332300 |
| H  | -1.94799200 | -2.81846300 | -2.69421000 |
| H  | -0.56421900 | -3.38527600 | -1.72575100 |
| H  | -2.06442600 | -4.35335300 | -1.78984400 |
| C  | -5.77618400 | 0.61440200  | 1.80201900  |
| H  | -5.84262200 | 1.70564500  | 1.74602100  |
| H  | -6.78928900 | 0.19449100  | 1.78311800  |
| H  | -5.30064200 | 0.35570900  | 2.75361500  |
| C  | -5.80583400 | 0.38575100  | -1.06448200 |



|   |             |             |             |
|---|-------------|-------------|-------------|
| H | -6.82881500 | 0.01043900  | -0.93967600 |
| H | -5.83745500 | 1.47109300  | -1.20421700 |
| H | -5.37285200 | -0.04891000 | -1.97096600 |
| C | -0.57679100 | 2.07135800  | -2.52438800 |
| H | -0.56847100 | 1.21237800  | -3.20433000 |
| H | -0.73051600 | 2.97615600  | -3.13333300 |
| C | 0.81289100  | 2.17532300  | -1.85312200 |
| H | 1.55578800  | 2.04774400  | -2.65278500 |
| O | -1.67008500 | 1.86494100  | -1.64933600 |
| N | 0.98550400  | 1.01938900  | -0.94212800 |
| H | 0.42751900  | 1.13445000  | -0.07910700 |
| C | 1.04321200  | 3.55642300  | -1.18945000 |
| H | 0.90477500  | 4.30560700  | -1.98072700 |
| H | 0.25317400  | 3.73530900  | -0.45354500 |
| C | 2.40451100  | 3.74988800  | -0.55453300 |
| C | 2.58866600  | 3.56530800  | 0.82301100  |
| C | 3.51548600  | 4.11075300  | -1.33144800 |
| C | 3.84733900  | 3.72602200  | 1.40625100  |
| H | 1.73788200  | 3.29086400  | 1.44195700  |
| C | 4.77562200  | 4.27102100  | -0.75325100 |
| H | 3.38968100  | 4.27534100  | -2.40009800 |
| C | 4.94576500  | 4.07728100  | 0.61966400  |
| H | 3.96756800  | 3.57992800  | 2.47659500  |
| H | 5.62257000  | 4.55414500  | -1.37305200 |
| H | 5.92527800  | 4.20514200  | 1.07255100  |
| C | 5.41650300  | -2.59851300 | 2.00235500  |
| C | 4.13407600  | -2.29033100 | 1.54361200  |
| C | 3.72935000  | -2.74688700 | 0.28709500  |
| C | 4.58502700  | -3.51432200 | -0.50822200 |
| C | 5.86395300  | -3.81746600 | -0.04129400 |
| C | 6.28191100  | -3.35704400 | 1.21083300  |
| H | 5.73615600  | -2.25264500 | 2.98185400  |
| H | 3.43833500  | -1.72507200 | 2.15485300  |
| H | 4.23767000  | -3.88435400 | -1.46767800 |
| H | 6.53230400  | -4.41980500 | -0.65096800 |
| H | 7.27850000  | -3.59679000 | 1.57206300  |
| S | 2.08865800  | -2.30286300 | -0.34431700 |
| O | 1.66674500  | -3.44615200 | -1.18959200 |
| O | 1.28306300  | -1.95357000 | 0.85561700  |
| C | 2.19834600  | -0.89502500 | -1.35619100 |
| H | 2.80941600  | -1.10397700 | -2.23423100 |
| C | 2.38395500  | 0.45876600  | -0.67985300 |
| H | 2.55985700  | 0.43196300  | 0.39635800  |
| H | 3.13623300  | 1.09339300  | -1.14950200 |
| H | 0.88995400  | -0.13655600 | -1.45874400 |
| O | -1.83330600 | 3.35504400  | 0.54161900  |
| C | -1.34475200 | 2.66741900  | 1.47529800  |
| C | -1.27929100 | 3.27732300  | 2.87269000  |
| H | -1.58567700 | 4.32532400  | 2.86003300  |
| H | -1.93744000 | 2.71293700  | 3.54364400  |

|   |             |            |             |
|---|-------------|------------|-------------|
| H | -0.26520300 | 3.18795100 | 3.27687700  |
| O | -0.88061000 | 1.47715400 | 1.35735500  |
| H | -1.72138900 | 2.55367200 | -0.91784200 |

**ADD2-N-OAc**

|    |             |             |             |
|----|-------------|-------------|-------------|
| Ag | 1.99175000  | -0.34855800 | 0.17757100  |
| P  | 3.07222100  | 1.55107600  | -0.97148800 |
| C  | 4.88139700  | 1.07226800  | -1.05816000 |
| H  | 5.49487300  | 1.95156200  | -1.29685900 |
| H  | 4.98086500  | 0.37997400  | -1.90475500 |
| C  | 5.40222400  | 0.40219100  | 0.23062300  |
| H  | 6.46737700  | 0.15737500  | 0.11989500  |
| H  | 5.32701400  | 1.10385500  | 1.07212400  |
| P  | 4.44970200  | -1.13720300 | 0.73498200  |
| C  | 3.10373500  | 3.16245300  | -0.06518400 |
| H  | 3.76744200  | 3.89118000  | -0.54610300 |
| H  | 2.08210900  | 3.55182100  | -0.04443900 |
| H  | 3.42990100  | 3.00472800  | 0.96781200  |
| C  | 2.71524900  | 2.08240500  | -2.70465800 |
| H  | 2.76212300  | 1.21821300  | -3.37481100 |
| H  | 1.69737100  | 2.48124000  | -2.72501300 |
| H  | 3.41659900  | 2.84948000  | -3.05411100 |
| C  | 5.31145200  | -1.56039600 | 2.32534800  |
| H  | 4.94571900  | -2.52841500 | 2.68250500  |
| H  | 6.40117100  | -1.61206600 | 2.21086100  |
| H  | 5.06805800  | -0.81003600 | 3.08462700  |
| C  | 5.15447900  | -2.41261600 | -0.41501500 |
| H  | 6.25106000  | -2.43229200 | -0.39355300 |
| H  | 4.77203900  | -3.39807600 | -0.13052000 |
| H  | 4.81717100  | -2.21557500 | -1.43735800 |
| C  | 0.10825500  | -2.48789100 | -2.04146000 |
| H  | 0.51639100  | -1.90203200 | -2.87096400 |
| H  | 0.06641500  | -3.54299900 | -2.35552200 |
| C  | -1.32820300 | -1.99825400 | -1.76237400 |
| H  | -1.84410400 | -2.05099500 | -2.73373600 |
| O  | 1.03272700  | -2.33800000 | -0.97115000 |
| N  | -1.28106200 | -0.58431500 | -1.39057100 |
| H  | -0.76163100 | -0.45092100 | -0.52545200 |
| C  | -2.06515000 | -2.98008700 | -0.79740900 |
| H  | -1.88816100 | -3.99469500 | -1.18329200 |
| H  | -1.59225400 | -2.94413500 | 0.18871800  |
| C  | -3.56005900 | -2.77763200 | -0.66338500 |
| C  | -4.12589800 | -2.31832600 | 0.53406100  |
| C  | -4.42432400 | -3.06037800 | -1.73342700 |
| C  | -5.50456100 | -2.13081500 | 0.65704500  |
| H  | -3.47612200 | -2.10898700 | 1.38081200  |
| C  | -5.80218200 | -2.87330800 | -1.61776800 |
| H  | -4.01222000 | -3.43929800 | -2.66692100 |
| C  | -6.34859500 | -2.40402800 | -0.42048200 |

|   |             |             |             |
|---|-------------|-------------|-------------|
| H | -5.91842900 | -1.77428800 | 1.59701900  |
| H | -6.45088700 | -3.10133000 | -2.46000600 |
| H | -7.42192200 | -2.26104100 | -0.32711500 |
| C | -2.55771900 | 2.03431500  | 2.89484500  |
| C | -1.90281700 | 1.99117400  | 1.66129000  |
| C | -2.33853100 | 2.85050600  | 0.64777400  |
| C | -3.39422100 | 3.74547400  | 0.84337000  |
| C | -4.03630700 | 3.77402100  | 2.08138200  |
| C | -3.61901000 | 2.91796500  | 3.10417000  |
| H | -2.22703900 | 1.37680700  | 3.69378200  |
| H | -1.07257300 | 1.30519300  | 1.50957700  |
| H | -3.68459300 | 4.41893400  | 0.04368500  |
| H | -4.85462800 | 4.46863100  | 2.24926600  |
| H | -4.11917300 | 2.94488500  | 4.06872300  |
| S | -1.51386300 | 2.84322700  | -0.95314200 |
| O | -1.77565100 | 4.14129600  | -1.60348300 |
| O | -0.11814400 | 2.40454700  | -0.74036900 |
| C | -2.39004700 | 1.59130800  | -1.95265500 |
| H | -3.37614100 | 2.03528400  | -2.12602600 |
| C | -2.52755100 | 0.16705500  | -1.39119800 |
| H | -3.02151400 | 0.20855500  | -0.40961900 |
| H | -3.23882800 | -0.33634100 | -2.05492500 |
| H | -1.83046600 | 1.58518400  | -2.89376600 |
| O | 0.29992600  | -2.80299500 | 1.56840300  |
| C | 0.01269500  | -1.70655300 | 2.11012600  |
| C | -0.70544300 | -1.72755900 | 3.45988800  |
| H | -0.85042000 | -2.75048800 | 3.81325400  |
| H | -0.12699700 | -1.15982300 | 4.19725100  |
| H | -1.68031800 | -1.23366500 | 3.36588800  |
| O | 0.25076500  | -0.54478300 | 1.62556700  |
| H | 0.68956800  | -2.67646700 | -0.09557300 |

### TS1-O-OAc

|    |             |             |             |
|----|-------------|-------------|-------------|
| Ag | -0.96417300 | 1.00479300  | -0.21865600 |
| P  | -2.88449800 | 2.85923800  | -1.15071100 |
| C  | -1.76769300 | 4.37056000  | -1.12281200 |
| H  | -2.38935200 | 5.27516500  | -1.06789100 |
| H  | -1.25107000 | 4.40259900  | -2.09174800 |
| C  | -0.74306500 | 4.37971900  | 0.02611900  |
| H  | -0.18749500 | 5.32767600  | 0.02588000  |
| H  | -1.26102100 | 4.31266900  | 0.99079500  |
| P  | 0.47391400  | 2.96068700  | -0.00943100 |
| C  | 0.33093900  | -2.35756400 | -0.98547100 |
| H  | 0.71912400  | -1.49691000 | -1.53714500 |
| H  | 0.70971400  | -3.28134000 | -1.43063700 |
| C  | -1.19234900 | -2.37909400 | -0.94375400 |
| H  | -1.50287900 | -2.38311200 | -1.99852000 |
| O  | 0.87292800  | -2.30162600 | 0.37536700  |
| N  | -1.72460000 | -1.15289500 | -0.32561300 |

|   |             |             |             |
|---|-------------|-------------|-------------|
| H | -1.73561900 | -1.22268500 | 0.72021800  |
| C | -1.73027500 | -3.66820400 | -0.26440600 |
| H | -1.28534000 | -4.53697700 | -0.76865900 |
| H | -1.37696900 | -3.67742000 | 0.77239100  |
| C | -3.24010500 | -3.78096100 | -0.29797100 |
| C | -4.02502400 | -3.22861000 | 0.72731100  |
| C | -3.88405700 | -4.41963500 | -1.36743300 |
| C | -5.41838800 | -3.31476900 | 0.67519100  |
| H | -3.54168600 | -2.72503000 | 1.56215600  |
| C | -5.27617600 | -4.50732200 | -1.41853600 |
| H | -3.28795600 | -4.86152200 | -2.16406700 |
| C | -6.04827500 | -3.95350500 | -0.39518900 |
| H | -6.01161300 | -2.88505200 | 1.47835600  |
| H | -5.75614300 | -5.01229500 | -2.25308600 |
| H | -7.13238600 | -4.02364300 | -0.42976300 |
| H | -2.70499000 | -1.06250400 | -0.58772500 |
| O | -1.95887300 | 1.20648600  | 1.99747700  |
| C | -2.08626700 | 0.19645000  | 2.76221100  |
| C | -2.44931800 | 0.49881400  | 4.22130100  |
| H | -3.24663700 | 1.24773600  | 4.26948600  |
| H | -2.75495500 | -0.40893300 | 4.74735100  |
| H | -1.57498800 | 0.92326300  | 4.73028300  |
| O | -1.92261500 | -1.01144900 | 2.43842500  |
| H | 1.22827300  | -1.26248300 | 0.71150700  |
| C | 7.20266200  | -2.05456500 | -1.13611400 |
| C | 5.86698500  | -1.64731700 | -1.15348200 |
| C | 5.41027700  | -0.76397500 | -0.17339600 |
| C | 6.27087700  | -0.27399200 | 0.81284300  |
| C | 7.60272300  | -0.68795900 | 0.82253600  |
| C | 8.06808100  | -1.58012200 | -0.14799100 |
| H | 7.56846200  | -2.73554100 | -1.89989300 |
| H | 5.18558600  | -1.98307600 | -1.92802100 |
| H | 5.90242100  | 0.43683700  | 1.54569500  |
| H | 8.27977900  | -0.30799200 | 1.58274700  |
| H | 9.10715800  | -1.89792600 | -0.13840700 |
| S | 3.67000600  | -0.26417800 | -0.15899900 |
| O | 3.66487600  | 1.13950000  | 0.31307900  |
| O | 3.14098200  | -0.59822200 | -1.50464900 |
| C | 2.80988900  | -1.23817100 | 1.00177000  |
| H | 3.14193200  | -1.08582600 | 2.02458000  |
| C | 2.41221400  | -2.58954700 | 0.56841600  |
| H | 2.76933200  | -2.93897000 | -0.40014500 |
| H | 2.43284600  | -3.37068300 | 1.32633000  |
| C | 1.33807200  | 3.16681200  | 1.60615300  |
| C | 1.73707000  | 3.51006700  | -1.24225700 |
| C | -4.02365400 | 3.20730500  | 0.27307300  |
| C | -3.96225300 | 3.31478000  | -2.60213400 |
| H | -3.52425200 | 2.91529400  | 1.20213200  |
| H | -4.33877900 | 4.25754500  | 0.31531300  |
| H | -4.91442400 | 2.57726500  | 0.16974100  |

|   |             |            |             |
|---|-------------|------------|-------------|
| H | -3.37517200 | 3.27600500 | -3.52598700 |
| H | -4.77531200 | 2.58662400 | -2.69130700 |
| H | -4.39804500 | 4.31665000 | -2.50209000 |
| H | 2.57503100  | 2.80835700 | -1.20351900 |
| H | 1.31277900  | 3.49661600 | -2.25120900 |
| H | 2.09998600  | 4.52046600 | -1.01705700 |
| H | 2.19873800  | 2.49303000 | 1.61893300  |
| H | 1.67832200  | 4.19907900 | 1.75307400  |
| H | 0.64885500  | 2.88731500 | 2.40870400  |

### ADD1-O-real

|    |             |             |             |
|----|-------------|-------------|-------------|
| Ag | 0.75534100  | -1.53016100 | -0.19293800 |
| P  | 0.89264500  | -0.42701600 | 1.92575800  |
| C  | 0.59961400  | 1.41935100  | 2.00478100  |
| H  | 0.44630600  | 1.67882300  | 3.05968800  |
| H  | -0.36039900 | 1.58407700  | 1.50092100  |
| C  | 1.71485600  | 2.29949600  | 1.40959400  |
| H  | 1.61006300  | 3.32397100  | 1.78817200  |
| H  | 2.69640800  | 1.95568300  | 1.75624700  |
| P  | 1.81447700  | 2.29490600  | -0.46643900 |
| N  | 0.38969900  | -2.70655300 | -1.92933000 |
| H  | -1.33070700 | -1.82522300 | -1.71506900 |
| Si | 1.35281000  | -2.23846700 | -3.29742900 |
| Si | -0.09813900 | -4.34177200 | -1.56641100 |
| C  | 1.33580500  | -5.59615500 | -1.64642500 |
| H  | 0.99318000  | -6.60364600 | -1.37521300 |
| H  | 1.77930200  | -5.65969800 | -2.64787000 |
| H  | 2.13784400  | -5.31964100 | -0.94956500 |
| C  | -0.82410700 | -4.45218300 | 0.18745000  |
| H  | -0.07091000 | -4.25790200 | 0.96275000  |
| H  | -1.64077100 | -3.73375300 | 0.32622000  |
| H  | -1.22942100 | -5.45669100 | 0.37088900  |
| C  | -1.46385500 | -4.94707900 | -2.74503200 |
| H  | -1.12782700 | -4.99089600 | -3.78700400 |
| H  | -1.80714900 | -5.95174600 | -2.46462400 |
| H  | -2.33052400 | -4.27582300 | -2.70161500 |
| C  | 0.95962000  | -3.23574900 | -4.87245100 |
| H  | 1.56083400  | -2.86536100 | -5.71337400 |
| H  | 1.17972200  | -4.30424700 | -4.76061700 |
| H  | -0.09607000 | -3.14309100 | -5.15466900 |
| C  | 1.05815800  | -0.41123100 | -3.73663200 |
| H  | 1.72596800  | -0.09340300 | -4.54870400 |
| H  | 0.02644800  | -0.24293700 | -4.07005600 |
| H  | 1.24684800  | 0.24031300  | -2.87420000 |
| C  | 3.22325400  | -2.42303800 | -2.97876200 |
| H  | 3.54063100  | -1.78616800 | -2.14194000 |
| H  | 3.48304800  | -3.45759500 | -2.72236700 |
| H  | 3.81616300  | -2.13658400 | -3.85785400 |
| C  | -2.57811900 | -0.33912600 | -2.12398500 |

|   |             |             |             |
|---|-------------|-------------|-------------|
| H | -1.72639300 | 0.23326900  | -2.52511200 |
| H | -3.15900500 | -0.70504700 | -2.98862400 |
| C | -3.47392100 | 0.62100000  | -1.33243400 |
| H | -3.89612900 | 1.31863200  | -2.08126800 |
| O | -2.13928400 | -1.41106300 | -1.31749300 |
| N | -2.69230300 | 1.33488200  | -0.30944500 |
| H | -1.96243700 | 1.87618300  | -0.77114200 |
| H | -3.29592800 | 2.01596500  | 0.14988800  |
| C | -4.65819600 | -0.11984300 | -0.67401900 |
| H | -5.16098500 | -0.70886700 | -1.45135400 |
| H | -4.25157600 | -0.82962900 | 0.05262600  |
| C | -5.65927200 | 0.80828100  | -0.01816900 |
| C | -5.56593200 | 1.14063000  | 1.34211000  |
| C | -6.69652300 | 1.38474300  | -0.76758200 |
| C | -6.47628700 | 2.02017300  | 1.93342800  |
| H | -4.77191200 | 0.70294000  | 1.94256000  |
| C | -7.60912400 | 2.26261700  | -0.18170200 |
| H | -6.79240700 | 1.13343000  | -1.82199700 |
| C | -7.50191300 | 2.58459000  | 1.17343200  |
| H | -6.38669800 | 2.25859800  | 2.99044800  |
| H | -8.40813500 | 2.69093600  | -0.78179300 |
| H | -8.21464000 | 3.26431500  | 1.63303400  |
| C | 3.28250700  | 3.40843400  | -0.68108800 |
| C | 4.50229900  | 2.80251900  | -1.02216200 |
| C | 3.24737400  | 4.80157500  | -0.50984400 |
| C | 5.66274300  | 3.56555500  | -1.16889200 |
| H | 4.54053400  | 1.72726000  | -1.18140700 |
| C | 4.40460900  | 5.56561500  | -0.66508400 |
| H | 2.31016700  | 5.29472400  | -0.26688700 |
| C | 5.61534000  | 4.94900500  | -0.99119500 |
| H | 6.59887100  | 3.08025100  | -1.43218700 |
| H | 4.36102800  | 6.64387400  | -0.53368400 |
| H | 6.51519300  | 5.54605200  | -1.11362900 |
| C | 0.40019500  | 3.38896200  | -0.95888100 |
| C | 0.01847500  | 3.34521900  | -2.31297700 |
| C | -0.32934900 | 4.21973900  | -0.09225600 |
| C | -1.04017000 | 4.12091400  | -2.78776600 |
| H | 0.55200300  | 2.69068200  | -2.99772600 |
| C | -1.39823200 | 4.98731600  | -0.56380600 |
| H | -0.07490500 | 4.27460800  | 0.96195700  |
| C | -1.75410400 | 4.94335000  | -1.91269700 |
| H | -1.31340700 | 4.07432100  | -3.83853200 |
| H | -1.95111400 | 5.62056400  | 0.12534300  |
| H | -2.58584500 | 5.53950700  | -2.27794600 |
| C | 2.46193800  | -0.68144800 | 2.84894000  |
| C | 2.76885700  | 0.02421300  | 4.02545700  |
| C | 3.39077000  | -1.61199600 | 2.35749900  |
| C | 3.97315000  | -0.19943600 | 4.69275800  |
| H | 2.06520500  | 0.74701400  | 4.42901400  |
| C | 4.59438400  | -1.83861100 | 3.02858800  |

|   |             |             |            |
|---|-------------|-------------|------------|
| H | 3.17041500  | -2.15639100 | 1.44249300 |
| C | 4.88738500  | -1.13215600 | 4.19554300 |
| H | 4.19782200  | 0.35437500  | 5.60027400 |
| H | 5.30192100  | -2.56302400 | 2.63505400 |
| H | 5.82547300  | -1.30425900 | 4.71613400 |
| C | -0.45623900 | -1.05853100 | 3.01021100 |
| C | -0.22548600 | -1.64237400 | 4.26348200 |
| C | -1.77049200 | -0.98001200 | 2.51396300 |
| C | -1.29432800 | -2.13168400 | 5.01843400 |
| H | 0.78433000  | -1.72419500 | 4.65264400 |
| C | -2.83145900 | -1.46679100 | 3.27807000 |
| H | -1.96656900 | -0.54971500 | 1.53306300 |
| C | -2.59768000 | -2.04352500 | 4.52918500 |
| H | -1.10340700 | -2.58566300 | 5.98727700 |
| H | -3.84309300 | -1.41058700 | 2.88511500 |
| H | -3.42735700 | -2.42977300 | 5.11519500 |

**TS1-O-real**

|    |             |             |             |
|----|-------------|-------------|-------------|
| Ag | 0.25885400  | -1.12772100 | -0.20755100 |
| P  | 0.60925600  | -0.53264000 | 2.08555600  |
| C  | 0.93170800  | 1.28121100  | 2.40577700  |
| H  | 0.97326700  | 1.43243500  | 3.49138700  |
| H  | 0.03492700  | 1.80497600  | 2.05598700  |
| C  | 2.20060500  | 1.84899500  | 1.74503200  |
| H  | 2.45885300  | 2.80934500  | 2.20838600  |
| H  | 3.05649000  | 1.18890700  | 1.93157200  |
| P  | 2.09316400  | 2.02315900  | -0.12235300 |
| N  | 0.21888500  | -2.33137300 | -2.20636000 |
| H  | -0.73135000 | -1.49701400 | -2.22281700 |
| Si | 1.55283500  | -1.95842700 | -3.28002100 |
| Si | -0.45860000 | -3.93766700 | -1.96971800 |
| C  | 0.88876900  | -5.26148600 | -1.74774200 |
| H  | 0.43204900  | -6.24121600 | -1.55562300 |
| H  | 1.52550000  | -5.36687800 | -2.63431200 |
| H  | 1.54225100  | -5.03032900 | -0.89685600 |
| C  | -1.55309500 | -3.95865500 | -0.42108800 |
| H  | -0.96565500 | -3.87196500 | 0.50245400  |
| H  | -2.26622900 | -3.12663900 | -0.44409800 |
| H  | -2.12418800 | -4.89493300 | -0.36078000 |
| C  | -1.55695100 | -4.44258500 | -3.43494800 |
| H  | -0.99195400 | -4.51084300 | -4.37151000 |
| H  | -2.02990200 | -5.41772400 | -3.25934000 |
| H  | -2.35801000 | -3.70770700 | -3.58331500 |
| C  | 1.49158100  | -2.92164600 | -4.92087300 |
| H  | 2.32386800  | -2.62134000 | -5.57125200 |
| H  | 1.56552900  | -4.00648700 | -4.77774700 |
| H  | 0.56004400  | -2.72328200 | -5.46479600 |
| C  | 1.50310800  | -0.11447700 | -3.71825400 |
| H  | 2.34263300  | 0.15173700  | -4.37365500 |

|   |             |             |             |
|---|-------------|-------------|-------------|
| H | 0.57495300  | 0.14469100  | -4.24182300 |
| H | 1.56841400  | 0.50901700  | -2.81898200 |
| C | 3.23208000  | -2.32614300 | -2.46830900 |
| H | 3.34853700  | -1.74819300 | -1.54212200 |
| H | 3.33330000  | -3.38721900 | -2.21013500 |
| H | 4.06458100  | -2.06551600 | -3.13530300 |
| C | -1.98810800 | 0.44412300  | -2.33397500 |
| H | -1.17184500 | 1.18534400  | -2.45294100 |
| H | -2.35235400 | 0.22240400  | -3.35650200 |
| C | -3.14476800 | 1.15408100  | -1.60226600 |
| H | -3.47261900 | 1.97025500  | -2.27637400 |
| O | -1.56303300 | -0.71419000 | -1.69182600 |
| N | -2.69531400 | 1.68572300  | -0.30204600 |
| H | -1.93939700 | 2.35126400  | -0.46418500 |
| H | -3.45715100 | 2.21949000  | 0.11640800  |
| C | -4.33664700 | 0.19995900  | -1.39942200 |
| H | -4.61808600 | -0.19000500 | -2.38771000 |
| H | -3.98618800 | -0.65138700 | -0.80958300 |
| C | -5.54783800 | 0.83314100  | -0.74479000 |
| C | -6.00710600 | 0.38915100  | 0.50358400  |
| C | -6.25021800 | 1.87686600  | -1.36948800 |
| C | -7.12436600 | 0.96705600  | 1.11229200  |
| H | -5.48619000 | -0.42944600 | 0.99466300  |
| C | -7.36430900 | 2.46035000  | -0.76529600 |
| H | -5.92288000 | 2.23131700  | -2.34473500 |
| C | -7.80622200 | 2.00800900  | 0.48076400  |
| H | -7.46418200 | 0.59963600  | 2.07770800  |
| H | -7.89298300 | 3.26500200  | -1.27067000 |
| H | -8.67651100 | 2.45903000  | 0.95038600  |
| C | 3.78531500  | 2.70899500  | -0.44592500 |
| C | 4.75817100  | 1.81610900  | -0.92335700 |
| C | 4.14775100  | 4.04774500  | -0.22805700 |
| C | 6.06653600  | 2.24408900  | -1.15738000 |
| H | 4.48690100  | 0.78143800  | -1.12023300 |
| C | 5.45279200  | 4.47789000  | -0.47165600 |
| H | 3.40611900  | 4.76004300  | 0.12291900  |
| C | 6.41572300  | 3.57666800  | -0.93274000 |
| H | 6.80762600  | 1.53943900  | -1.52542400 |
| H | 5.71807200  | 5.51850400  | -0.30254000 |
| H | 7.43110500  | 3.91432800  | -1.12298500 |
| C | 0.99772800  | 3.50144000  | -0.34243600 |
| C | 0.49099900  | 3.71786900  | -1.63756200 |
| C | 0.61314700  | 4.38878200  | 0.67610300  |
| C | -0.35431600 | 4.79450600  | -1.90867300 |
| H | 0.75826100  | 3.03214500  | -2.43785300 |
| C | -0.24399900 | 5.46003000  | 0.40864900  |
| H | 0.97745500  | 4.25473700  | 1.69029200  |
| C | -0.72723100 | 5.66783600  | -0.88387800 |
| H | -0.72935200 | 4.94436300  | -2.91751800 |
| H | -0.53147300 | 6.13256300  | 1.21279800  |



|   |             |             |             |
|---|-------------|-------------|-------------|
| H | -1.39393200 | 6.50062700  | -1.09053600 |
| C | 1.98908700  | -1.38743700 | 2.95467600  |
| C | 2.48622400  | -0.96388300 | 4.19960400  |
| C | 2.57499100  | -2.50472900 | 2.33957100  |
| C | 3.53994300  | -1.64322400 | 4.81138400  |
| H | 2.05015700  | -0.10494700 | 4.70189500  |
| C | 3.62627500  | -3.18771300 | 2.95473700  |
| H | 2.20751800  | -2.83225900 | 1.37019600  |
| C | 4.11114200  | -2.75692000 | 4.19015200  |
| H | 3.91507200  | -1.30269300 | 5.77274700  |
| H | 4.06793400  | -4.05080900 | 2.46444100  |
| H | 4.93284500  | -3.28393400 | 4.66743400  |
| C | -0.90127000 | -0.80505600 | 3.10320100  |
| C | -0.90379500 | -1.52914700 | 4.30372000  |
| C | -2.10304200 | -0.25142100 | 2.62448500  |
| C | -2.08822300 | -1.68455700 | 5.02787600  |
| H | 0.01251800  | -1.97619000 | 4.67558900  |
| C | -3.27669200 | -0.39680700 | 3.36522900  |
| H | -2.13683600 | 0.28027100  | 1.67163700  |
| C | -3.27386700 | -1.11291500 | 4.56495600  |
| H | -2.08014800 | -2.25242200 | 5.95460300  |
| H | -4.19625300 | 0.04617400  | 2.99294300  |
| H | -4.19326600 | -1.23122900 | 5.13241500  |

### ADD2-O-real

|    |             |             |             |
|----|-------------|-------------|-------------|
| Ag | 0.79178100  | 0.34444000  | -0.01177500 |
| P  | 0.44311200  | -0.72556500 | 2.07339400  |
| C  | 0.21780500  | -2.58660900 | 2.00381300  |
| H  | 0.28986100  | -2.97994800 | 3.02540400  |
| H  | 1.07969200  | -2.97663600 | 1.45144300  |
| C  | -1.09342700 | -3.07102000 | 1.36127800  |
| H  | -1.12841200 | -4.16741700 | 1.40032200  |
| H  | -1.94454700 | -2.71958100 | 1.95619100  |
| P  | -1.44798900 | -2.45344300 | -0.37984400 |
| N  | -1.99208800 | 3.26585600  | -1.03022800 |
| H  | -1.11721500 | 2.74057900  | -1.23469700 |
| Si | -3.40902000 | 2.58410500  | -1.77276800 |
| Si | -1.64676600 | 4.82120400  | -0.32376900 |
| C  | -3.18043800 | 5.49344200  | 0.57421600  |
| H  | -2.96323900 | 6.46824600  | 1.02955400  |
| H  | -4.03279500 | 5.63472100  | -0.10181400 |
| H  | -3.50230800 | 4.81835100  | 1.37683900  |
| C  | -0.22923200 | 4.61775200  | 0.91460700  |
| H  | -0.54372300 | 4.02511600  | 1.78304700  |
| H  | 0.60034700  | 4.08615600  | 0.43327600  |
| H  | 0.14159200  | 5.58386400  | 1.28015600  |
| C  | -1.11935600 | 6.10578900  | -1.62050900 |
| H  | -1.91065100 | 6.27227300  | -2.36188600 |
| H  | -0.87917000 | 7.07546300  | -1.16446800 |

|   |             |             |             |
|---|-------------|-------------|-------------|
| H | -0.22917800 | 5.76228100  | -2.16208400 |
| C | -4.26299200 | 3.79082300  | -2.96736600 |
| H | -5.15968300 | 3.34186300  | -3.41452700 |
| H | -4.57779100 | 4.71258100  | -2.46216100 |
| H | -3.58941800 | 4.07765300  | -3.78410300 |
| C | -2.88202200 | 1.04084100  | -2.73634500 |
| H | -3.74273300 | 0.55136300  | -3.20976500 |
| H | -2.16409100 | 1.29793700  | -3.52464900 |
| H | -2.39819400 | 0.31303200  | -2.07352400 |
| C | -4.70522600 | 2.07275300  | -0.47742100 |
| H | -4.29138600 | 1.32793500  | 0.21450000  |
| H | -5.03463900 | 2.93135000  | 0.12133800  |
| H | -5.59817800 | 1.63812800  | -0.94617300 |
| C | 1.11073100  | 1.72709800  | -2.64064900 |
| H | 0.47672800  | 1.09402700  | -3.30422700 |
| H | 1.26849800  | 2.67595800  | -3.19147000 |
| C | 2.49341400  | 1.02671500  | -2.56443300 |
| H | 2.84787700  | 0.85346100  | -3.59520500 |
| O | 0.52976800  | 1.95156600  | -1.40810800 |
| N | 2.32715100  | -0.25697800 | -1.84643200 |
| H | 1.82314300  | -0.92880500 | -2.42450900 |
| H | 3.23224300  | -0.66968900 | -1.62748200 |
| C | 3.53321000  | 1.90201000  | -1.83559200 |
| H | 3.62161700  | 2.83753400  | -2.40252500 |
| H | 3.12948300  | 2.16351600  | -0.85157600 |
| C | 4.89576700  | 1.25704400  | -1.69094800 |
| C | 5.30340900  | 0.68928200  | -0.47404300 |
| C | 5.77909900  | 1.18731900  | -2.78040700 |
| C | 6.54912400  | 0.06759600  | -0.34996400 |
| H | 4.64153500  | 0.74757400  | 0.38767700  |
| C | 7.02348200  | 0.56868900  | -2.66108600 |
| H | 5.48695800  | 1.63024100  | -3.73046000 |
| C | 7.41346900  | 0.00403300  | -1.44347800 |
| H | 6.84564600  | -0.35858700 | 0.60541900  |
| H | 7.69283000  | 0.53200400  | -3.51701900 |
| H | 8.38478400  | -0.47422400 | -1.34813800 |
| C | -3.05257600 | -3.34058300 | -0.66506300 |
| C | -4.22721700 | -2.57386300 | -0.60945700 |
| C | -3.15706800 | -4.71893800 | -0.91162200 |
| C | -5.47795500 | -3.17255800 | -0.77692800 |
| H | -4.16117600 | -1.50158500 | -0.44218700 |
| C | -4.40587100 | -5.31572800 | -1.08740300 |
| H | -2.25929500 | -5.32758900 | -0.97873000 |
| C | -5.56902100 | -4.54430400 | -1.01673300 |
| H | -6.37775800 | -2.56491500 | -0.73012100 |
| H | -4.47167200 | -6.38331900 | -1.28183400 |
| H | -6.54087300 | -5.01063300 | -1.15567600 |
| C | -0.26155300 | -3.41198500 | -1.43133300 |
| C | -0.10110600 | -2.96205700 | -2.75551700 |
| C | 0.49861700  | -4.51421100 | -1.00978900 |

|   |             |             |             |
|---|-------------|-------------|-------------|
| C | 0.77603600  | -3.60240700 | -3.63189600 |
| H | -0.67323800 | -2.10274900 | -3.09889700 |
| C | 1.38904000  | -5.14797100 | -1.88197200 |
| H | 0.40037800  | -4.89418600 | 0.00316200  |
| C | 1.52879100  | -4.69604200 | -3.19468700 |
| H | 0.87462300  | -3.24594400 | -4.65402600 |
| H | 1.96868200  | -5.99944700 | -1.53441000 |
| H | 2.21890000  | -5.19095300 | -3.87254600 |
| C | -1.01536900 | -0.15550000 | 3.03557900  |
| C | -1.37694300 | -0.74831100 | 4.25849300  |
| C | -1.80541200 | 0.88368500  | 2.52054800  |
| C | -2.50560300 | -0.31005600 | 4.94984500  |
| H | -0.77094500 | -1.54649300 | 4.67986500  |
| C | -2.93616800 | 1.32074600  | 3.21670100  |
| H | -1.54143500 | 1.35092800  | 1.57467100  |
| C | -3.28746300 | 0.72518200  | 4.42817800  |
| H | -2.77507100 | -0.77516200 | 5.89438600  |
| H | -3.53953400 | 2.12376200  | 2.80361300  |
| H | -4.16776900 | 1.06496800  | 4.96724700  |
| C | 1.87714000  | -0.56790800 | 3.22382600  |
| C | 1.85822400  | 0.30499900  | 4.32179700  |
| C | 3.06170700  | -1.26982400 | 2.93999300  |
| C | 2.99103600  | 0.45958400  | 5.12418400  |
| H | 0.95873900  | 0.86590300  | 4.55454700  |
| C | 4.18840700  | -1.12008900 | 3.74822000  |
| H | 3.11341900  | -1.93103500 | 2.07865500  |
| C | 4.15656700  | -0.25415000 | 4.84396500  |
| H | 2.95829900  | 1.14066400  | 5.97033000  |
| H | 5.09286700  | -1.67716200 | 3.51827900  |
| H | 5.03593300  | -0.13353400 | 5.47053800  |

**ADD3-O-real**

|   |             |             |             |
|---|-------------|-------------|-------------|
| C | 1.06756700  | -0.29374500 | 0.62503800  |
| H | 1.98862100  | -0.69304400 | 0.15905500  |
| H | 1.41363600  | 0.48059000  | 1.34692000  |
| C | 0.46975400  | -1.44431700 | 1.46805400  |
| H | 0.12080100  | -2.22101200 | 0.77539800  |
| O | 0.20421900  | 0.21742900  | -0.32798300 |
| N | -0.74065800 | -0.94073800 | 2.15931000  |
| H | -1.24919900 | -1.70253800 | 2.60490000  |
| H | -0.46265000 | -0.30061600 | 2.90493100  |
| C | 1.51214100  | -2.05686300 | 2.43295100  |
| H | 2.38650700  | -2.35331600 | 1.83925700  |
| H | 1.85595500  | -1.27245200 | 3.12137400  |
| C | 0.99291800  | -3.24238800 | 3.21682900  |
| C | 0.52939700  | -3.10184700 | 4.53318600  |
| C | 0.92501800  | -4.51441900 | 2.62622400  |
| C | 0.01090900  | -4.19173100 | 5.23724500  |
| H | 0.59074900  | -2.12953200 | 5.01827300  |

|    |             |             |             |
|----|-------------|-------------|-------------|
| C  | 0.40863400  | -5.60594900 | 3.32459800  |
| H  | 1.28943400  | -4.64824000 | 1.60970800  |
| C  | -0.05278400 | -5.44851800 | 4.63424900  |
| H  | 0.37173700  | -6.58242400 | 2.84809300  |
| H  | -0.45180700 | -6.29914300 | 5.18048800  |
| Ag | -1.84109400 | 0.37065700  | 0.44443900  |
| P  | -3.87000000 | 1.67165900  | 0.52215200  |
| C  | -5.19855300 | 0.70853600  | -0.37833600 |
| H  | -6.05814500 | 1.36059700  | -0.57613200 |
| H  | -5.53326900 | -0.08512000 | 0.30075800  |
| C  | -4.67971700 | 0.11199100  | -1.70310500 |
| H  | -5.51634200 | -0.29286900 | -2.28471900 |
| H  | -4.22911300 | 0.90210300  | -2.31474400 |
| P  | -3.34125800 | -1.19139800 | -1.45853900 |
| C  | 5.34761300  | 6.38598000  | 0.36191700  |
| C  | 4.56622100  | 5.25023200  | 0.57398400  |
| C  | 5.02650400  | 4.01549300  | 0.11068500  |
| C  | 6.25170000  | 3.89429300  | -0.54816400 |
| C  | 7.02428100  | 5.03821900  | -0.75547900 |
| C  | 6.57186500  | 6.28055500  | -0.30446800 |
| H  | 5.00447500  | 7.35178600  | 0.72216400  |
| H  | 3.62195100  | 5.30783600  | 1.10533600  |
| H  | 6.59608700  | 2.91707500  | -0.87015700 |
| H  | 7.98180700  | 4.95720500  | -1.26222700 |
| H  | 7.17773700  | 7.16800900  | -0.46610300 |
| S  | 4.01283700  | 2.54834300  | 0.36959000  |
| O  | 4.93129200  | 1.38793500  | 0.32067600  |
| O  | 3.16984600  | 2.78917700  | 1.55324300  |
| C  | 2.98273900  | 2.46774000  | -1.07599200 |
| H  | 3.53145700  | 2.29430400  | -1.99680800 |
| C  | 1.65439300  | 2.49719700  | -0.96798500 |
| H  | 1.16496800  | 2.63774400  | -0.01239200 |
| H  | 1.02161300  | 2.37237700  | -1.83883800 |
| H  | -0.33644900 | -4.05831400 | 6.25883500  |
| H  | 4.68862000  | -0.71773200 | -0.31841400 |
| N  | 4.98167100  | -1.68415300 | -0.47118200 |
| Si | 4.30405400  | -2.41241200 | -1.90808700 |
| Si | 6.27905000  | -2.13821300 | 0.61509200  |
| C  | 7.93773400  | -1.39164300 | 0.07235200  |
| H  | 8.74936400  | -1.65067500 | 0.76490700  |
| H  | 8.22420800  | -1.74339600 | -0.92649000 |
| H  | 7.87047800  | -0.29741700 | 0.03206500  |
| C  | 5.87308800  | -1.49922000 | 2.34774900  |
| H  | 6.70432400  | -1.66575300 | 3.04486800  |
| H  | 5.66599200  | -0.42303400 | 2.31936300  |
| H  | 4.98644600  | -1.99837800 | 2.75682400  |
| C  | 6.45096800  | -4.02597800 | 0.65207900  |
| H  | 6.68980200  | -4.44572600 | -0.33259500 |
| H  | 7.26024700  | -4.31874700 | 1.33311400  |
| H  | 5.53118000  | -4.50578800 | 1.00687900  |

|   |             |             |             |
|---|-------------|-------------|-------------|
| C | 5.65434400  | -2.98254000 | -3.11568600 |
| H | 6.28179000  | -2.13922000 | -3.42912700 |
| H | 6.31509700  | -3.73614000 | -2.66986500 |
| H | 5.21637500  | -3.42750800 | -4.01875400 |
| C | 3.22642100  | -3.91624900 | -1.48820300 |
| H | 2.80245000  | -4.37190400 | -2.39252100 |
| H | 3.79811400  | -4.69086500 | -0.96313900 |
| H | 2.39252600  | -3.61972300 | -0.83983600 |
| C | 3.22672000  | -1.11767400 | -2.77509000 |
| H | 2.77316400  | -1.54905300 | -3.67690300 |
| H | 2.41362500  | -0.75849800 | -2.13258900 |
| H | 3.82124100  | -0.24950300 | -3.08673200 |
| C | -4.28682600 | -2.78011400 | -1.49436100 |
| C | -5.65218600 | -2.87642700 | -1.18189500 |
| C | -3.57490600 | -3.97016000 | -1.73477600 |
| C | -6.28881500 | -4.11926500 | -1.12471300 |
| H | -6.23657600 | -1.98283100 | -0.98240500 |
| C | -4.21157800 | -5.20852400 | -1.68395800 |
| H | -2.51600300 | -3.92401700 | -1.97667900 |
| C | -5.57295400 | -5.28895800 | -1.37759400 |
| H | -7.34812000 | -4.16879000 | -0.88522100 |
| H | -3.64309100 | -6.11318000 | -1.88337300 |
| H | -6.06867200 | -6.25491200 | -1.33429700 |
| C | -2.49705500 | -1.17736500 | -3.09787400 |
| C | -1.15457600 | -0.76328900 | -3.13919600 |
| C | -3.14787200 | -1.53677800 | -4.29110500 |
| C | -0.48652500 | -0.70016700 | -4.36755700 |
| H | -0.62783400 | -0.49963100 | -2.21881600 |
| C | -2.47391900 | -1.47171700 | -5.50947100 |
| H | -4.17952100 | -1.87869300 | -4.26610300 |
| C | -1.14090700 | -1.05001300 | -5.54869900 |
| H | 0.55353300  | -0.38593600 | -4.39109300 |
| H | -2.98542000 | -1.75186100 | -6.42703700 |
| H | -0.61498000 | -1.00279200 | -6.49911700 |
| C | -4.63528800 | 2.09180900  | 2.14360300  |
| C | -6.00777400 | 1.97826700  | 2.41556500  |
| C | -3.78044100 | 2.54254400  | 3.16415700  |
| C | -6.51166500 | 2.31131300  | 3.67544200  |
| H | -6.69400700 | 1.62846200  | 1.65033100  |
| C | -4.28622000 | 2.88594700  | 4.41734400  |
| H | -2.71235800 | 2.61798700  | 2.97389400  |
| C | -5.65398100 | 2.76854800  | 4.67658700  |
| H | -7.57615200 | 2.21376300  | 3.87160400  |
| H | -3.61119100 | 3.23525000  | 5.19388600  |
| H | -6.04788800 | 3.02697300  | 5.65570000  |
| C | -3.85552100 | 3.27313100  | -0.39899100 |
| C | -2.76061800 | 3.55955100  | -1.22779000 |
| C | -4.91005600 | 4.19708200  | -0.31892100 |
| C | -2.72749500 | 4.73992400  | -1.97481400 |
| H | -1.93186100 | 2.85714500  | -1.27835300 |

|   |             |            |             |
|---|-------------|------------|-------------|
| C | -4.87210800 | 5.37777300 | -1.05969600 |
| H | -5.75656300 | 4.00164500 | 0.33406900  |
| C | -3.78187400 | 5.64967600 | -1.89141600 |
| H | -1.87431100 | 4.94910700 | -2.61443100 |
| H | -5.69149400 | 6.08800100 | -0.98581100 |
| H | -3.75387900 | 6.57107600 | -2.46691700 |

**TS2-O-real**

|    |             |             |             |
|----|-------------|-------------|-------------|
| C  | -1.04797700 | -0.12101900 | -1.17018100 |
| H  | -2.10068400 | -0.07255500 | -0.85324700 |
| H  | -0.99790100 | 0.35686400  | -2.16745100 |
| C  | -0.65067900 | -1.59470600 | -1.30917400 |
| H  | -0.68525200 | -2.05491900 | -0.31407400 |
| O  | -0.23004400 | 0.53626800  | -0.24093100 |
| N  | 0.77008800  | -1.67033400 | -1.74664600 |
| H  | 1.07945300  | -2.64160500 | -1.75977900 |
| H  | 0.83890600  | -1.33953200 | -2.71059600 |
| C  | -1.61463100 | -2.35796100 | -2.24864900 |
| H  | -2.62665500 | -2.25782900 | -1.83748800 |
| H  | -1.62266900 | -1.85800500 | -3.22712300 |
| C  | -1.26077300 | -3.82017400 | -2.42078200 |
| C  | -0.55177400 | -4.26821100 | -3.54531300 |
| C  | -1.60378400 | -4.76099000 | -1.43677400 |
| C  | -0.19093100 | -5.61095500 | -3.68381800 |
| H  | -0.29601400 | -3.55982400 | -4.33108100 |
| C  | -1.24552500 | -6.10273400 | -1.57064600 |
| H  | -2.16822700 | -4.43947000 | -0.56453500 |
| C  | -0.53510700 | -6.53287400 | -2.69445500 |
| H  | -1.52819400 | -6.81477900 | -0.79954400 |
| H  | -0.26021300 | -7.57888400 | -2.80104000 |
| Ag | 1.96446200  | -0.16221800 | -0.37938200 |
| P  | 4.14569500  | 1.00681500  | -0.74300900 |
| C  | 5.15441700  | 0.42060500  | 0.72636000  |
| H  | 6.05523400  | 1.03704700  | 0.83286900  |
| H  | 5.48172600  | -0.60425900 | 0.51211300  |
| C  | 4.35411200  | 0.45307800  | 2.04281500  |
| H  | 5.01280900  | 0.17955700  | 2.87512500  |
| H  | 3.98787500  | 1.46890300  | 2.23524600  |
| P  | 2.83459800  | -0.66013900 | 2.00488300  |
| C  | -3.86479600 | 6.65675900  | -0.82376200 |
| C  | -3.41502200 | 5.36000300  | -1.07463000 |
| C  | -4.00633700 | 4.28612600  | -0.40497600 |
| C  | -5.04842100 | 4.49616900  | 0.50104700  |
| C  | -5.49002200 | 5.79689000  | 0.74935600  |
| C  | -4.89794200 | 6.87773200  | 0.09121500  |
| H  | -3.41410800 | 7.49533200  | -1.34874300 |
| H  | -2.62865800 | 5.16661600  | -1.79692600 |
| H  | -5.51691100 | 3.64443800  | 0.98306800  |
| H  | -6.30392400 | 5.96531000  | 1.45001100  |

|    |             |             |             |
|----|-------------|-------------|-------------|
| H  | -5.24738200 | 7.88895700  | 0.28328400  |
| S  | -3.38852200 | 2.60672500  | -0.70130900 |
| O  | -4.58364500 | 1.74497200  | -0.46456000 |
| O  | -2.77281300 | 2.63816500  | -2.04989600 |
| C  | -2.18506800 | 2.29006800  | 0.47977500  |
| H  | -2.56970400 | 2.07828000  | 1.47093300  |
| C  | -0.83975400 | 2.18893600  | 0.13162200  |
| H  | -0.54342400 | 2.63873100  | -0.81329200 |
| H  | -0.11549100 | 2.30667000  | 0.93561300  |
| H  | 0.35147400  | -5.93581700 | -4.56819000 |
| H  | -4.90951800 | -0.18639300 | -0.00738600 |
| N  | -5.32138800 | -1.12051800 | 0.09528100  |
| Si | -5.13957000 | -1.77753900 | 1.69907600  |
| Si | -6.43961500 | -1.45386200 | -1.21123300 |
| C  | -8.06880900 | -0.50280100 | -1.00942900 |
| H  | -8.75184300 | -0.67764100 | -1.85111200 |
| H  | -8.59026100 | -0.79358600 | -0.08905200 |
| H  | -7.87466000 | 0.57517600  | -0.95410600 |
| C  | -5.63368500 | -0.92635900 | -2.83841600 |
| H  | -6.34155600 | -0.97449300 | -3.67574800 |
| H  | -5.26585800 | 0.10370700  | -2.76363700 |
| H  | -4.77905000 | -1.56782000 | -3.08581100 |
| C  | -6.82544900 | -3.31148500 | -1.25701700 |
| H  | -7.30423700 | -3.66306600 | -0.33471200 |
| H  | -7.51092300 | -3.53873500 | -2.08348200 |
| H  | -5.91649700 | -3.90584900 | -1.40927300 |
| C  | -6.80038300 | -2.07831300 | 2.56976900  |
| H  | -7.36323700 | -1.14336900 | 2.67840600  |
| H  | -7.43373600 | -2.78085800 | 2.01408100  |
| H  | -6.65101100 | -2.49845500 | 3.57317800  |
| C  | -4.20613300 | -3.43144500 | 1.66981800  |
| H  | -4.12036200 | -3.86974200 | 2.67268700  |
| H  | -4.70999700 | -4.16521600 | 1.02885500  |
| H  | -3.19056600 | -3.28960000 | 1.27889000  |
| C  | -4.13135500 | -0.53740200 | 2.71788900  |
| H  | -3.90809700 | -0.93410600 | 3.71667400  |
| H  | -3.18231400 | -0.30536000 | 2.21924200  |
| H  | -4.67603900 | 0.40621100  | 2.84142400  |
| C  | 3.52688000  | -2.31214900 | 2.45562500  |
| C  | 4.00630500  | -3.11635100 | 1.40652500  |
| C  | 3.58907700  | -2.80999100 | 3.76647500  |
| C  | 4.56441800  | -4.36944000 | 1.66376600  |
| H  | 3.92480600  | -2.76613500 | 0.37978900  |
| C  | 4.13447600  | -4.06964900 | 4.02070800  |
| H  | 3.19956900  | -2.22133000 | 4.59082500  |
| C  | 4.62953000  | -4.84903100 | 2.97318900  |
| H  | 4.93196400  | -4.97594500 | 0.84026400  |
| H  | 4.16931400  | -4.44320400 | 5.04074000  |
| H  | 5.05192600  | -5.82959400 | 3.17499600  |
| C  | 1.85660100  | -0.08280800 | 3.44631300  |

|   |             |             |             |
|---|-------------|-------------|-------------|
| C | 0.46351000  | 0.00095200  | 3.28169800  |
| C | 2.42393000  | 0.30573800  | 4.67308300  |
| C | -0.34626100 | 0.43900500  | 4.33260900  |
| H | 0.01716700  | -0.24253700 | 2.32039400  |
| C | 1.61217600  | 0.74791700  | 5.71796000  |
| H | 3.50059500  | 0.26774700  | 4.81693400  |
| C | 0.22584700  | 0.80894200  | 5.55043500  |
| H | -1.42173100 | 0.49712300  | 4.19040800  |
| H | 2.06151200  | 1.04657500  | 6.66144900  |
| H | -0.40432300 | 1.15377500  | 6.36584300  |
| C | 5.24379800  | 0.69164200  | -2.18791600 |
| C | 6.58718100  | 0.29805400  | -2.08514800 |
| C | 4.68076400  | 0.84138800  | -3.46747600 |
| C | 7.34750400  | 0.06326200  | -3.23389300 |
| H | 7.05239000  | 0.17191400  | -1.11249200 |
| C | 5.44377900  | 0.61803400  | -4.61244500 |
| H | 3.63829300  | 1.13610300  | -3.56446000 |
| C | 6.77981200  | 0.22484600  | -4.49792400 |
| H | 8.38562200  | -0.24347700 | -3.13738300 |
| H | 4.99348900  | 0.74326000  | -5.59334800 |
| H | 7.37311000  | 0.04222900  | -5.38961500 |
| C | 4.17892900  | 2.84045300  | -0.54301800 |
| C | 2.97750600  | 3.50743600  | -0.26221700 |
| C | 5.36571100  | 3.58514400  | -0.64776300 |
| C | 2.96352500  | 4.89220900  | -0.07382600 |
| H | 2.05080200  | 2.94319300  | -0.19813600 |
| C | 5.34908300  | 4.96683800  | -0.46386000 |
| H | 6.30229700  | 3.08801000  | -0.88756400 |
| C | 4.14805000  | 5.62187800  | -0.17369700 |
| H | 2.02559700  | 5.39591100  | 0.14262600  |
| H | 6.27185500  | 5.53434300  | -0.55092400 |
| H | 4.13754100  | 6.69931800  | -0.03305800 |

**ADD4-O-real**

|   |             |             |             |
|---|-------------|-------------|-------------|
| C | -1.11276500 | -0.23686600 | -1.29992000 |
| H | -2.16424800 | -0.18571000 | -0.99787900 |
| H | -1.03525900 | 0.24358400  | -2.29066700 |
| C | -0.66464000 | -1.69301100 | -1.38607800 |
| H | -0.72891900 | -2.13243200 | -0.38350300 |
| O | -0.31268400 | 0.44858100  | -0.35043700 |
| N | 0.77543000  | -1.74656500 | -1.76590500 |
| H | 1.09440500  | -2.71534100 | -1.75872300 |
| H | 0.87503900  | -1.42773600 | -2.73129100 |
| C | -1.56757100 | -2.50238300 | -2.34681600 |
| H | -2.60158900 | -2.40313600 | -1.99586600 |
| H | -1.53014000 | -2.03844000 | -3.34211900 |
| C | -1.18402500 | -3.96433600 | -2.44208000 |
| C | -0.39466400 | -4.44070700 | -3.49934200 |
| C | -1.58272800 | -4.87358600 | -1.44962600 |



|    |             |             |             |
|----|-------------|-------------|-------------|
| C  | -0.00837600 | -5.78212100 | -3.56335700 |
| H  | -0.09698000 | -3.75781200 | -4.29296700 |
| C  | -1.19953500 | -6.21368000 | -1.50983900 |
| H  | -2.21182100 | -4.53023100 | -0.63143700 |
| C  | -0.40811400 | -6.67258100 | -2.56612000 |
| H  | -1.52633700 | -6.90206800 | -0.73488500 |
| H  | -0.11396800 | -7.71755400 | -2.61548600 |
| Ag | 1.96113300  | -0.27722700 | -0.38925200 |
| P  | 4.10976800  | 0.98714700  | -0.71642800 |
| C  | 5.07382300  | 0.45209700  | 0.80126500  |
| H  | 5.95989300  | 1.08614400  | 0.92553200  |
| H  | 5.42539200  | -0.57168200 | 0.62301500  |
| C  | 4.22644100  | 0.50010900  | 2.08798300  |
| H  | 4.86218300  | 0.26371600  | 2.94891100  |
| H  | 3.83019700  | 1.51124000  | 2.24130700  |
| P  | 2.74052400  | -0.65366100 | 2.02878800  |
| C  | -3.13297500 | 6.49914100  | -1.17305500 |
| C  | -3.04490900 | 5.11096600  | -1.29599000 |
| C  | -3.64455900 | 4.29073000  | -0.33631700 |
| C  | -4.34120800 | 4.85513800  | 0.73679500  |
| C  | -4.42522300 | 6.24279400  | 0.85415300  |
| C  | -3.81823000 | 7.06837800  | -0.09687700 |
| H  | -2.67577600 | 7.13729300  | -1.92582700 |
| H  | -2.54182900 | 4.65276100  | -2.14135100 |
| H  | -4.83037900 | 4.20451900  | 1.45468300  |
| H  | -4.97430900 | 6.68130500  | 1.68405700  |
| H  | -3.88960200 | 8.14935300  | -0.00547600 |
| S  | -3.45332300 | 2.48112200  | -0.44499700 |
| O  | -4.73931500 | 1.98363100  | 0.13372800  |
| O  | -3.15919100 | 2.23724300  | -1.88495100 |
| C  | -2.16056000 | 1.95763000  | 0.50167900  |
| H  | -2.36079500 | 1.91013500  | 1.56562800  |
| C  | -0.82113700 | 1.87438100  | -0.03479300 |
| H  | -0.69789800 | 2.41117200  | -0.98227200 |
| H  | -0.04368500 | 2.17504900  | 0.67662400  |
| H  | 0.59628100  | -6.13074900 | -4.39673500 |
| H  | -5.11031500 | 0.05439700  | 0.19182000  |
| N  | -5.50733600 | -0.89197800 | 0.11354800  |
| Si | -5.38106300 | -1.77787500 | 1.60327800  |
| Si | -6.49486200 | -1.00241400 | -1.32654000 |
| C  | -7.87524300 | 0.29406800  | -1.28694200 |
| H  | -8.45350600 | 0.31398800  | -2.21988300 |
| H  | -8.57242400 | 0.10823200  | -0.46051800 |
| H  | -7.43934600 | 1.28889300  | -1.13560900 |
| C  | -5.42590300 | -0.68952700 | -2.85856700 |
| H  | -6.03765800 | -0.59277500 | -3.76529100 |
| H  | -4.84311000 | 0.23263500  | -2.74355000 |
| H  | -4.71991400 | -1.51401900 | -3.02286300 |
| C  | -7.25897000 | -2.73612000 | -1.45185100 |
| H  | -7.92331500 | -2.96112400 | -0.60887900 |

|   |             |             |             |
|---|-------------|-------------|-------------|
| H | -7.85748900 | -2.81843800 | -2.36820600 |
| H | -6.49093800 | -3.51835300 | -1.49250800 |
| C | -7.05395200 | -2.08772800 | 2.44873100  |
| H | -7.57043900 | -1.14087500 | 2.64762000  |
| H | -7.71836900 | -2.70103000 | 1.82774200  |
| H | -6.92790900 | -2.60905400 | 3.40704100  |
| C | -4.56166400 | -3.47366200 | 1.33961900  |
| H | -4.51473000 | -4.05032700 | 2.27264500  |
| H | -5.10866800 | -4.07675800 | 0.60472700  |
| H | -3.53556700 | -3.34805200 | 0.97060200  |
| C | -4.28962400 | -0.75812500 | 2.77034500  |
| H | -4.05606600 | -1.31258000 | 3.68853900  |
| H | -3.34988400 | -0.48757700 | 2.27363300  |
| H | -4.78603900 | 0.17780000  | 3.05277700  |
| C | 3.46370700  | -2.28102300 | 2.51650300  |
| C | 3.93852800  | -3.11482800 | 1.48933400  |
| C | 3.56041100  | -2.72585600 | 3.84429300  |
| C | 4.52296500  | -4.34800400 | 1.78307900  |
| H | 3.83487800  | -2.80349200 | 0.45206200  |
| C | 4.13318900  | -3.96489100 | 4.13552400  |
| H | 3.17499400  | -2.11259500 | 4.65265600  |
| C | 4.62104400  | -4.77551300 | 3.10823100  |
| H | 4.88610100  | -4.97924300 | 0.97645500  |
| H | 4.19449200  | -4.29845200 | 5.16800000  |
| H | 5.06432900  | -5.74033500 | 3.33881600  |
| C | 1.70293700  | -0.09215100 | 3.43288700  |
| C | 0.30966600  | -0.11781600 | 3.25417300  |
| C | 2.22659100  | 0.37989700  | 4.64968400  |
| C | -0.54316200 | 0.29728800  | 4.27944000  |
| H | -0.10842200 | -0.43301000 | 2.30188900  |
| C | 1.37199500  | 0.79925700  | 5.66956300  |
| H | 3.30119900  | 0.42471800  | 4.80586200  |
| C | -0.01293800 | 0.75306300  | 5.48719700  |
| H | -1.61793600 | 0.27141700  | 4.12408800  |
| H | 1.78727300  | 1.16404300  | 6.60529800  |
| H | -0.67603900 | 1.08163100  | 6.28280800  |
| C | 5.25866900  | 0.65552800  | -2.11651900 |
| C | 6.60085900  | 0.27562000  | -1.96106400 |
| C | 4.73809000  | 0.77748100  | -3.41688600 |
| C | 7.40166400  | 0.02766900  | -3.07913000 |
| H | 7.03411800  | 0.17025900  | -0.97135300 |
| C | 5.54140800  | 0.54096300  | -4.53110800 |
| H | 3.69728000  | 1.06181700  | -3.55494000 |
| C | 6.87608700  | 0.16200800  | -4.36434200 |
| H | 8.43839400  | -0.26784300 | -2.94189800 |
| H | 5.12390400  | 0.64530100  | -5.52877800 |
| H | 7.50097900  | -0.03050400 | -5.23197300 |
| C | 4.09672900  | 2.82408400  | -0.56208000 |
| C | 2.87143900  | 3.47742100  | -0.36539400 |
| C | 5.27591500  | 3.58604500  | -0.62312000 |

|   |            |            |             |
|---|------------|------------|-------------|
| C | 2.82501400 | 4.86637700 | -0.21687000 |
| H | 1.95032600 | 2.90194200 | -0.33311100 |
| C | 5.22717000 | 4.97150800 | -0.47850700 |
| H | 6.23214700 | 3.09936000 | -0.79823500 |
| C | 4.00164100 | 5.61313700 | -0.27255700 |
| H | 1.86873800 | 5.35884800 | -0.06479300 |
| H | 6.14420700 | 5.55231600 | -0.53078000 |
| H | 3.96636500 | 6.69351800 | -0.16230700 |

**TS3-O-real**

|    |             |             |             |
|----|-------------|-------------|-------------|
| C  | -1.61782700 | -0.53888500 | -1.48485800 |
| H  | -2.63999900 | -0.85817900 | -1.27067200 |
| H  | -1.63111400 | 0.17326100  | -2.32491800 |
| C  | -0.76829100 | -1.75783800 | -1.81221800 |
| H  | -0.69707800 | -2.36591900 | -0.90424200 |
| O  | -1.06544300 | 0.08474900  | -0.32086000 |
| N  | 0.62124400  | -1.32429600 | -2.13648200 |
| H  | 1.19654100  | -2.14993400 | -2.30458000 |
| H  | 0.60719100  | -0.80950100 | -3.01877000 |
| C  | -1.40149500 | -2.61335400 | -2.93123500 |
| H  | -2.41378100 | -2.88328200 | -2.60936400 |
| H  | -1.51262000 | -2.00156200 | -3.83719500 |
| C  | -0.60034400 | -3.86120300 | -3.24092100 |
| C  | 0.17517000  | -3.95874400 | -4.40478700 |
| C  | -0.59433100 | -4.94219200 | -2.34403800 |
| C  | 0.93657300  | -5.10055900 | -4.66971300 |
| H  | 0.16687400  | -3.14008600 | -5.12200300 |
| C  | 0.16580800  | -6.08253300 | -2.60439900 |
| H  | -1.19829900 | -4.89168000 | -1.44058100 |
| C  | 0.93545000  | -6.16541500 | -3.76833200 |
| H  | 0.15021700  | -6.91123900 | -1.90146300 |
| H  | 1.52255500  | -7.05662200 | -3.97315500 |
| Ag | 1.40192000  | 0.02093000  | -0.40031900 |
| P  | 2.77206800  | 2.15057400  | -0.27122200 |
| C  | 4.26771200  | 1.51909900  | 0.66038800  |
| H  | 4.92841600  | 2.34920700  | 0.93594200  |
| H  | 4.82645600  | 0.91111600  | -0.06175600 |
| C  | 3.91532200  | 0.67752500  | 1.90118800  |
| H  | 4.83826400  | 0.40500000  | 2.42607000  |
| H  | 3.29859300  | 1.25887100  | 2.59682600  |
| P  | 2.94782500  | -0.87316800 | 1.46795400  |
| C  | -2.94346500 | 5.84691100  | -1.08872900 |
| C  | -3.20282500 | 4.49082700  | -1.30937700 |
| C  | -3.97444600 | 3.78039800  | -0.38750000 |
| C  | -4.50123900 | 4.41308700  | 0.74271100  |
| C  | -4.23543300 | 5.76506900  | 0.95877600  |
| C  | -3.45442400 | 6.48264300  | 0.04596800  |
| H  | -2.35671000 | 6.40944700  | -1.81074000 |
| H  | -2.84560100 | 3.98370300  | -2.19984600 |

|    |             |             |             |
|----|-------------|-------------|-------------|
| H  | -5.13071300 | 3.85281700  | 1.42734200  |
| H  | -4.64926000 | 6.26413800  | 1.83109300  |
| H  | -3.25998200 | 7.53940700  | 0.21101000  |
| S  | -4.30388000 | 2.01035100  | -0.65529800 |
| O  | -5.70086300 | 1.80314400  | -0.22935600 |
| O  | -3.89644100 | 1.74836500  | -2.05756500 |
| C  | -3.23681500 | 1.10060200  | 0.42619200  |
| H  | -3.47571000 | 1.43106700  | 1.44051300  |
| C  | -1.76225700 | 1.28762300  | 0.10084900  |
| H  | -1.60092600 | 2.04250700  | -0.68272700 |
| H  | -1.20760800 | 1.59827500  | 0.98965100  |
| H  | 1.52269500  | -5.15872200 | -5.58338600 |
| H  | -3.63745000 | -0.17127000 | 0.46445600  |
| N  | -3.98758000 | -1.54361500 | 0.66351400  |
| Si | -3.30709200 | -2.21505800 | 2.07894600  |
| Si | -5.39778600 | -2.11446900 | -0.14802700 |
| C  | -7.02039300 | -1.44493400 | 0.58864500  |
| H  | -7.90200300 | -1.80961300 | 0.04363700  |
| H  | -7.13259700 | -1.73915300 | 1.64028000  |
| H  | -7.02273500 | -0.34990000 | 0.54344900  |
| C  | -5.39049800 | -1.62967500 | -1.99250600 |
| H  | -6.35764000 | -1.87419100 | -2.45223700 |
| H  | -5.21225200 | -0.56098800 | -2.15198300 |
| H  | -4.62269700 | -2.18301100 | -2.55150000 |
| C  | -5.54675000 | -4.02543500 | -0.15547500 |
| H  | -5.64323900 | -4.44590600 | 0.85331200  |
| H  | -6.43245700 | -4.33983700 | -0.72449500 |
| H  | -4.67241100 | -4.49671900 | -0.62443000 |
| C  | -4.54661000 | -2.77497000 | 3.42385800  |
| H  | -5.17960200 | -1.93615600 | 3.74011700  |
| H  | -5.21443300 | -3.56902100 | 3.06814700  |
| H  | -4.02884200 | -3.15555400 | 4.31551400  |
| C  | -2.20245400 | -3.74896600 | 1.73904400  |
| H  | -1.77924800 | -4.17312900 | 2.66130700  |
| H  | -2.77154500 | -4.54574100 | 1.24370300  |
| H  | -1.36568300 | -3.48404700 | 1.07651000  |
| C  | -2.16015200 | -0.96244400 | 2.95649500  |
| H  | -1.69374700 | -1.41181800 | 3.84287100  |
| H  | -1.35681800 | -0.62657800 | 2.28994100  |
| H  | -2.71276800 | -0.07562100 | 3.29226200  |
| C  | 4.28733300  | -1.99804100 | 0.87065000  |
| C  | 4.44004300  | -2.19043300 | -0.51136700 |
| C  | 5.17126100  | -2.65008900 | 1.74573600  |
| C  | 5.46325200  | -2.99964400 | -1.01092100 |
| H  | 3.74746100  | -1.71056800 | -1.19921900 |
| C  | 6.18824800  | -3.46378100 | 1.24681400  |
| H  | 5.05544600  | -2.53507600 | 2.81970200  |
| C  | 6.33887500  | -3.63738200 | -0.13163600 |
| H  | 5.56752300  | -3.13923000 | -2.08351000 |
| H  | 6.86135500  | -3.96724900 | 1.93552600  |

|   |             |             |             |
|---|-------------|-------------|-------------|
| H | 7.13028900  | -4.27440700 | -0.51674800 |
| C | 2.45663600  | -1.55543500 | 3.10054700  |
| C | 1.41151500  | -2.49334300 | 3.12194300  |
| C | 3.06736100  | -1.19126400 | 4.31267500  |
| C | 1.00020900  | -3.06946900 | 4.32385300  |
| H | 0.90279200  | -2.76476600 | 2.20108500  |
| C | 2.64607100  | -1.76141500 | 5.51531700  |
| H | 3.87191000  | -0.46225100 | 4.32977300  |
| C | 1.61627400  | -2.70412300 | 5.52224400  |
| H | 0.18640200  | -3.78827800 | 4.32076600  |
| H | 3.12355600  | -1.46743200 | 6.44618000  |
| H | 1.28792600  | -3.14435400 | 6.45962400  |
| C | 2.13480100  | 3.55221300  | 0.73556200  |
| C | 0.85689100  | 4.04437300  | 0.41842200  |
| C | 2.84049900  | 4.14221100  | 1.79671300  |
| C | 0.30260700  | 5.10583600  | 1.13297900  |
| H | 0.28712800  | 3.59123300  | -0.38828900 |
| C | 2.28044500  | 5.19855000  | 2.51905400  |
| H | 3.82888900  | 3.78659000  | 2.07142100  |
| C | 1.01405500  | 5.68242500  | 2.18792900  |
| H | -0.68639300 | 5.47049900  | 0.87093900  |
| H | 2.83677900  | 5.64156300  | 3.34073500  |
| H | 0.57972800  | 6.50193000  | 2.75371000  |
| C | 3.54655300  | 2.93825100  | -1.74633300 |
| C | 3.54943300  | 2.22831700  | -2.95670200 |
| C | 4.14516000  | 4.20717300  | -1.69873500 |
| C | 4.15502900  | 2.76602900  | -4.09381500 |
| H | 3.06777900  | 1.25436100  | -3.00839300 |
| C | 4.74311700  | 4.74646900  | -2.83795600 |
| H | 4.13255800  | 4.77978000  | -0.77559700 |
| C | 4.75196100  | 4.02645600  | -4.03534700 |
| H | 4.14966400  | 2.20685700  | -5.02545300 |
| H | 5.19983700  | 5.73135700  | -2.79148700 |
| H | 5.21548100  | 4.45077000  | -4.92164800 |

#### ADD5-O-real

|   |             |            |             |
|---|-------------|------------|-------------|
| C | 1.63359800  | 1.16675600 | -1.15837300 |
| H | 2.70973100  | 1.03462800 | -0.93311900 |
| H | 1.48053000  | 1.12128900 | -2.25020700 |
| C | 1.17304700  | 2.51132700 | -0.62050000 |
| H | 1.28860600  | 2.50764900 | 0.46918600  |
| O | 0.85625000  | 0.12063000 | -0.54058200 |
| N | -0.28676100 | 2.70494400 | -0.87860900 |
| H | -0.57729200 | 3.59144600 | -0.46470600 |
| H | -0.42810900 | 2.81766200 | -1.88436700 |
| C | 2.04068200  | 3.64577400 | -1.21430700 |
| H | 3.08187700  | 3.42932600 | -0.94794000 |
| H | 1.97948200  | 3.59887400 | -2.31071500 |
| C | 1.63013200  | 5.02439600 | -0.73828000 |

|    |             |             |             |
|----|-------------|-------------|-------------|
| C  | 0.81218800  | 5.84750400  | -1.52736800 |
| C  | 2.03180700  | 5.49804200  | 0.52127600  |
| C  | 0.39943800  | 7.10329900  | -1.07405700 |
| H  | 0.51485300  | 5.51117200  | -2.51927400 |
| C  | 1.62118200  | 6.75152800  | 0.97660000  |
| H  | 2.68477400  | 4.88566200  | 1.13790400  |
| C  | 0.80114700  | 7.55774000  | 0.18264600  |
| H  | 1.95118500  | 7.10322800  | 1.95065600  |
| H  | 0.48768200  | 8.53622100  | 0.53676300  |
| Ag | -1.50025400 | 0.88872600  | -0.17016200 |
| P  | -3.43768600 | -0.31223000 | -1.34074600 |
| C  | -4.49612200 | -0.70620000 | 0.15719900  |
| H  | -5.31652500 | -1.38030100 | -0.11414700 |
| H  | -4.96328900 | 0.24427500  | 0.44387700  |
| C  | -3.69634500 | -1.28707000 | 1.33901600  |
| H  | -4.38666000 | -1.55641600 | 2.14656200  |
| H  | -3.17518500 | -2.20208700 | 1.03280200  |
| P  | -2.38717200 | -0.10062400 | 1.97986100  |
| C  | -0.23637300 | -5.69877200 | 0.07667900  |
| C  | 0.62732300  | -4.83244300 | -0.59699400 |
| C  | 1.83035700  | -4.46487500 | 0.00818500  |
| C  | 2.19256800  | -4.96083200 | 1.26250300  |
| C  | 1.32398200  | -5.82796800 | 1.92633400  |
| C  | 0.11036800  | -6.19296200 | 1.33661100  |
| H  | -1.17314100 | -5.99332500 | -0.38889000 |
| H  | 0.38761900  | -4.46129600 | -1.58765700 |
| H  | 3.14993600  | -4.68360400 | 1.69198900  |
| H  | 1.59924600  | -6.22720600 | 2.89863800  |
| H  | -0.56031100 | -6.87311200 | 1.85527400  |
| S  | 2.96377700  | -3.34280900 | -0.85147800 |
| O  | 4.31452300  | -3.64920600 | -0.35709800 |
| O  | 2.63728900  | -3.42241300 | -2.29062600 |
| C  | 2.49538100  | -1.69151000 | -0.26138600 |
| H  | 2.34753000  | -1.77443000 | 0.81911000  |
| C  | 1.23160100  | -1.19368000 | -0.96523700 |
| H  | 1.38115100  | -1.20738200 | -2.05139300 |
| H  | 0.37548100  | -1.83263300 | -0.72763300 |
| H  | -0.22544100 | 7.72797500  | -1.70740400 |
| H  | 3.37066000  | -1.02691400 | -0.42891600 |
| N  | 4.69598300  | 0.71016100  | -0.37407200 |
| Si | 5.13304600  | 1.02359400  | 1.22253800  |
| Si | 5.60729700  | 0.58947700  | -1.79746400 |
| C  | 6.93353700  | -0.78811200 | -1.79533600 |
| H  | 7.41905000  | -0.89635100 | -2.77538500 |
| H  | 7.72062700  | -0.58502500 | -1.05761000 |
| H  | 6.48344500  | -1.75444000 | -1.53415700 |
| C  | 4.48001800  | 0.17789000  | -3.29569800 |
| H  | 5.07312600  | 0.09048900  | -4.21602200 |
| H  | 3.95339300  | -0.77686500 | -3.16203500 |
| H  | 3.72477000  | 0.95670500  | -3.47226400 |

|   |             |             |             |
|---|-------------|-------------|-------------|
| C | 6.52286400  | 2.19757000  | -2.30552900 |
| H | 7.24280200  | 2.50236300  | -1.53431700 |
| H | 7.07863600  | 2.08069000  | -3.24656000 |
| H | 5.81984700  | 3.03164400  | -2.43785100 |
| C | 6.99372000  | 0.91500400  | 1.66043000  |
| H | 7.38794100  | -0.08984800 | 1.46353100  |
| H | 7.58704900  | 1.61914600  | 1.06241600  |
| H | 7.17978600  | 1.14349500  | 2.71920000  |
| C | 4.58118700  | 2.76127200  | 1.83921700  |
| H | 4.88781300  | 2.95790900  | 2.87607900  |
| H | 5.00125600  | 3.55720300  | 1.21004100  |
| H | 3.48530400  | 2.84997000  | 1.80155800  |
| C | 4.26209300  | -0.15753100 | 2.46682200  |
| H | 4.53275600  | 0.07647300  | 3.50603100  |
| H | 3.16989700  | -0.06678800 | 2.37784900  |
| H | 4.52777600  | -1.20503300 | 2.27486400  |
| C | -3.34329500 | 0.99574400  | 3.11422700  |
| C | -3.63156600 | 2.30343700  | 2.69399500  |
| C | -3.80335500 | 0.57098400  | 4.37128200  |
| C | -4.38145700 | 3.16226600  | 3.50103800  |
| H | -3.25506300 | 2.65462500  | 1.73586200  |
| C | -4.54512300 | 1.43158400  | 5.17986000  |
| H | -3.56621700 | -0.42652600 | 4.72977800  |
| C | -4.83952200 | 2.72669600  | 4.74473800  |
| H | -4.59507300 | 4.17247800  | 3.16274700  |
| H | -4.88896600 | 1.09292100  | 6.15340000  |
| H | -5.41488800 | 3.39579800  | 5.37847700  |
| C | -1.32782100 | -1.14934800 | 3.04815800  |
| C | 0.01894400  | -0.77726000 | 3.19285300  |
| C | -1.79120900 | -2.30025900 | 3.70895600  |
| C | 0.88144000  | -1.52733900 | 3.99433900  |
| H | 0.40013000  | 0.09153200  | 2.66290100  |
| C | -0.92643800 | -3.05071500 | 4.50661700  |
| H | -2.82347900 | -2.62165700 | 3.60116900  |
| C | 0.40776500  | -2.66379800 | 4.65245400  |
| H | 1.92243100  | -1.23028200 | 4.08199300  |
| H | -1.29513500 | -3.93982900 | 5.01103800  |
| H | 1.07947200  | -3.25235100 | 5.27114100  |
| C | -3.08105700 | -1.93869600 | -2.12351000 |
| C | -1.91856700 | -2.03272000 | -2.90761900 |
| C | -3.89218800 | -3.07694000 | -1.98020600 |
| C | -1.57932000 | -3.22793900 | -3.54353600 |
| H | -1.27095300 | -1.16661400 | -3.01577600 |
| C | -3.54987900 | -4.27470200 | -2.61137300 |
| H | -4.79664000 | -3.03797700 | -1.37993800 |
| C | -2.39547000 | -4.35181200 | -3.39455800 |
| H | -0.67288300 | -3.28294800 | -4.13947100 |
| H | -4.18752500 | -5.14664300 | -2.49280600 |
| H | -2.13093400 | -5.28475800 | -3.88431300 |
| C | -4.64581400 | 0.52579800  | -2.45168700 |

|   |             |             |             |
|---|-------------|-------------|-------------|
| C | -4.78799900 | 1.91803900  | -2.32901900 |
| C | -5.42280000 | -0.15571300 | -3.40024300 |
| C | -5.70405100 | 2.61131200  | -3.12042800 |
| H | -4.17301500 | 2.46219500  | -1.61507800 |
| C | -6.33026500 | 0.54182900  | -4.19953300 |
| H | -5.31469800 | -1.22907000 | -3.52283600 |
| C | -6.47616300 | 1.92328200  | -4.05896300 |
| H | -5.80519800 | 3.68783300  | -3.01305600 |
| H | -6.92302600 | 0.00370300  | -4.93422400 |
| H | -7.18247000 | 2.46270600  | -4.68381500 |

### ADD3-N-real

|    |             |             |             |
|----|-------------|-------------|-------------|
| Ag | -0.59627300 | -0.40679800 | -0.24823400 |
| P  | -0.08274900 | -2.72130200 | 0.19055500  |
| C  | -1.67948800 | -3.51703400 | 0.72979700  |
| H  | -1.50137800 | -4.56060800 | 1.01314500  |
| H  | -2.33467800 | -3.53672200 | -0.14850400 |
| C  | -2.36003100 | -2.74578800 | 1.88175200  |
| H  | -3.17216500 | -3.35149700 | 2.29884900  |
| H  | -1.64447900 | -2.56999600 | 2.69217300  |
| P  | -3.01563000 | -1.06454700 | 1.32995200  |
| C  | 0.03142600  | 2.56633200  | -1.19883500 |
| H  | 0.24349400  | 2.24483300  | -2.23733500 |
| H  | -0.47048300 | 3.54722700  | -1.28515200 |
| C  | 1.39022900  | 2.85191700  | -0.51390300 |
| H  | 1.94803400  | 3.58476300  | -1.10964800 |
| O  | -0.77994200 | 1.67591200  | -0.51319000 |
| N  | 2.20239300  | 1.58722400  | -0.53963100 |
| H  | 2.85198100  | 1.46668400  | 0.25851400  |
| C  | 1.24077500  | 3.37289900  | 0.92804600  |
| H  | 0.52752200  | 4.20552300  | 0.88697400  |
| H  | 0.76985600  | 2.59371100  | 1.53733700  |
| C  | 2.54314100  | 3.83649300  | 1.54820400  |
| C  | 3.29036300  | 2.99863000  | 2.38723200  |
| C  | 3.04830100  | 5.11466300  | 1.26129300  |
| C  | 4.51355800  | 3.41988400  | 2.91628200  |
| H  | 2.91905600  | 2.00621400  | 2.63166300  |
| C  | 4.26428100  | 5.54163400  | 1.79300700  |
| H  | 2.47657700  | 5.78333800  | 0.62046500  |
| C  | 5.00325700  | 4.69230100  | 2.62160500  |
| H  | 5.07883300  | 2.75045600  | 3.55849500  |
| H  | 4.63437900  | 6.53755500  | 1.56370600  |
| H  | 5.95157600  | 5.02299000  | 3.03652400  |
| C  | 8.12014900  | 1.59376400  | -0.83475600 |
| C  | 6.83812600  | 1.17648300  | -0.46905200 |
| C  | 6.35928000  | -0.05665700 | -0.92232200 |
| C  | 7.15833000  | -0.87434400 | -1.72858900 |
| C  | 8.43826000  | -0.45183800 | -2.08562500 |
| C  | 8.91979200  | 0.78466900  | -1.64446600 |



|    |             |             |             |
|----|-------------|-------------|-------------|
| H  | 8.49750400  | 2.54871900  | -0.47743500 |
| H  | 6.22047100  | 1.78033500  | 0.18723200  |
| H  | 6.78042300  | -1.84020600 | -2.04838300 |
| H  | 9.06440500  | -1.09090500 | -2.70312300 |
| H  | 9.91832600  | 1.11077200  | -1.92363300 |
| S  | 4.64896200  | -0.56286300 | -0.56659900 |
| O  | 4.71165800  | -2.04397200 | -0.48038200 |
| O  | 4.31465400  | 0.23176200  | 0.67461200  |
| C  | 3.55602100  | -0.08659100 | -1.75382800 |
| H  | 3.51245800  | -0.69643000 | -2.64634100 |
| C  | 3.11033000  | 1.31796600  | -1.76894000 |
| H  | 3.87402600  | 2.10740300  | -1.67716100 |
| H  | 2.50694700  | 1.52653400  | -2.65553300 |
| H  | 1.56287500  | 0.77996900  | -0.47922700 |
| H  | -2.49525100 | 1.94455300  | -1.54470100 |
| N  | -3.28835800 | 2.13172300  | -2.17473900 |
| Si | -3.40415000 | 1.01374200  | -3.51075400 |
| Si | -4.32235500 | 3.43064700  | -1.63233100 |
| C  | -6.13427900 | 2.87929200  | -1.50894100 |
| H  | -6.77406600 | 3.69453400  | -1.14648500 |
| H  | -6.53235700 | 2.56247600  | -2.48105400 |
| H  | -6.24144900 | 2.03284700  | -0.81980200 |
| C  | -3.72140400 | 3.97311900  | 0.08076600  |
| H  | -2.65659800 | 4.23546200  | 0.06248000  |
| H  | -4.27670700 | 4.85169900  | 0.43257200  |
| H  | -3.84700600 | 3.17693500  | 0.82381800  |
| C  | -4.25279200 | 4.93289400  | -2.79115100 |
| H  | -4.59132000 | 4.68059000  | -3.80305400 |
| H  | -4.88938600 | 5.74911000  | -2.42486900 |
| H  | -3.22919300 | 5.31877500  | -2.87386000 |
| C  | -4.27800500 | -0.59831800 | -3.01935900 |
| H  | -4.32608600 | -1.31076700 | -3.85376500 |
| H  | -3.74939700 | -1.08439500 | -2.18940700 |
| H  | -5.30301200 | -0.40658500 | -2.67992000 |
| C  | -4.36176000 | 1.79440900  | -4.94837600 |
| H  | -4.43205600 | 1.08806600  | -5.78537300 |
| H  | -5.38651700 | 2.06918300  | -4.67066200 |
| H  | -3.86232800 | 2.69799000  | -5.31704800 |
| C  | -1.65855900 | 0.57057200  | -4.10348400 |
| H  | -1.13025300 | 1.45650500  | -4.47604500 |
| H  | -1.06066800 | 0.14394800  | -3.28726000 |
| H  | -1.68718000 | -0.17000300 | -4.91302700 |
| C  | -4.83487300 | -1.36531300 | 1.19496600  |
| C  | -5.34871600 | -2.58940400 | 0.73734600  |
| C  | -5.73460500 | -0.31248800 | 1.43614300  |
| C  | -6.72095900 | -2.76278500 | 0.54468800  |
| H  | -4.68289500 | -3.42198000 | 0.52627500  |
| C  | -7.10513300 | -0.48733100 | 1.24457500  |
| H  | -5.36334100 | 0.64607500  | 1.78716200  |
| C  | -7.60449900 | -1.71355500 | 0.79914300  |

|   |             |             |             |
|---|-------------|-------------|-------------|
| H | -7.09700900 | -3.72100200 | 0.19560400  |
| H | -7.78382300 | 0.33710200  | 1.44656400  |
| H | -8.67213700 | -1.84822300 | 0.64936100  |
| C | -2.87921200 | -0.04223600 | 2.85821500  |
| C | -3.37425300 | -0.45686200 | 4.10667500  |
| C | -2.24144400 | 1.20512500  | 2.75519300  |
| C | -3.22340200 | 0.35302000  | 5.23125700  |
| H | -3.88678500 | -1.41098400 | 4.19909000  |
| C | -2.09856500 | 2.01753900  | 3.88503300  |
| H | -1.86058900 | 1.54102800  | 1.79223200  |
| C | -2.58406900 | 1.59211200  | 5.12136700  |
| H | -3.60717300 | 0.02123400  | 6.19253400  |
| H | -1.60832000 | 2.98319800  | 3.79447100  |
| H | -2.46999300 | 2.22367600  | 5.99847100  |
| C | 1.07639500  | -3.00089800 | 1.58850900  |
| C | 2.09355100  | -2.06262900 | 1.81190800  |
| C | 1.01360200  | -4.14434700 | 2.40374700  |
| C | 3.03779300  | -2.26179800 | 2.82057900  |
| H | 2.18396000  | -1.18591700 | 1.18067800  |
| C | 1.94216500  | -4.32941400 | 3.42711500  |
| H | 0.24947400  | -4.89924600 | 2.24275400  |
| C | 2.95652200  | -3.38986600 | 3.63567100  |
| H | 3.83725900  | -1.53752100 | 2.93831300  |
| H | 1.87998100  | -5.21407700 | 4.05535100  |
| H | 3.68633500  | -3.54656200 | 4.42544900  |
| C | 0.55433300  | -3.76902700 | -1.17918300 |
| C | 1.93095100  | -3.73747100 | -1.46258600 |
| C | -0.29814400 | -4.53386500 | -1.99105200 |
| C | 2.43738500  | -4.47293800 | -2.53423600 |
| H | 2.61994200  | -3.14406000 | -0.86743600 |
| C | 0.21836900  | -5.26527300 | -3.06235100 |
| H | -1.36623500 | -4.57043400 | -1.79948700 |
| C | 1.58688600  | -5.23772500 | -3.33538600 |
| H | 3.50413200  | -4.43820700 | -2.73611600 |
| H | -0.45178500 | -5.85760800 | -3.67976000 |
| H | 1.98701100  | -5.80825200 | -4.16933700 |

**TS2-N-real**

|    |             |             |             |
|----|-------------|-------------|-------------|
| Ag | 0.32444000  | -0.40454600 | 0.25294600  |
| P  | 0.02852700  | -2.57231500 | -0.71394800 |
| C  | 1.62625400  | -3.14309400 | -1.48754400 |
| H  | 1.44509600  | -4.08452900 | -2.01921200 |
| H  | 2.32568900  | -3.36198500 | -0.67353100 |
| C  | 2.22790900  | -2.08474600 | -2.43794300 |
| H  | 2.94146300  | -2.56388800 | -3.11785300 |
| H  | 1.44400300  | -1.64720600 | -3.06605800 |
| P  | 3.04924900  | -0.67113500 | -1.49675500 |
| C  | -0.18326700 | 2.32651800  | 1.70913000  |
| H  | -0.60718500 | 1.82314400  | 2.60071100  |

|    |             |             |             |
|----|-------------|-------------|-------------|
| H  | 0.37478100  | 3.19930300  | 2.09778400  |
| C  | -1.36485800 | 2.92238200  | 0.90445600  |
| H  | -1.83618800 | 3.70099100  | 1.52292900  |
| O  | 0.67567200  | 1.51529300  | 0.98677600  |
| N  | -2.40006000 | 1.88500800  | 0.64049000  |
| H  | -2.92142200 | 2.06163000  | -0.22350700 |
| C  | -0.89787300 | 3.55474100  | -0.42012000 |
| H  | -0.07793500 | 4.24067600  | -0.17421100 |
| H  | -0.46520500 | 2.76558100  | -1.04333900 |
| C  | -1.98951600 | 4.29076000  | -1.16870900 |
| C  | -2.65428100 | 3.69542000  | -2.25060300 |
| C  | -2.38333600 | 5.58005000  | -0.77615900 |
| C  | -3.68818100 | 4.36155400  | -2.91482300 |
| H  | -2.35415400 | 2.70424600  | -2.58456800 |
| C  | -3.41036800 | 6.25053900  | -1.43939800 |
| H  | -1.87246600 | 6.06404300  | 0.05400600  |
| C  | -4.06925100 | 5.64088400  | -2.51100700 |
| H  | -4.19046500 | 3.87907800  | -3.74897000 |
| H  | -3.69489100 | 7.25086800  | -1.12313900 |
| H  | -4.86960300 | 6.16271100  | -3.02874900 |
| C  | -8.28824900 | 0.99580300  | 1.19210600  |
| C  | -7.01456700 | 0.82533100  | 0.64460100  |
| C  | -6.27572700 | -0.31307200 | 0.97505000  |
| C  | -6.79746100 | -1.28450100 | 1.83426200  |
| C  | -8.07022800 | -1.10567400 | 2.37529500  |
| C  | -8.81391300 | 0.03533100  | 2.05869700  |
| H  | -8.87219100 | 1.87543100  | 0.93463400  |
| H  | -6.59979500 | 1.54597000  | -0.05223100 |
| H  | -6.21794300 | -2.17569600 | 2.05349900  |
| H  | -8.48549000 | -1.85980100 | 3.03841500  |
| H  | -9.80591600 | 0.17036400  | 2.48131200  |
| S  | -4.59834500 | -0.51839800 | 0.32263300  |
| O  | -4.41958000 | -1.97267300 | 0.11320500  |
| O  | -4.51305800 | 0.41490300  | -0.83712500 |
| C  | -3.42999400 | 0.02651200  | 1.49492700  |
| H  | -3.40639500 | -0.62503300 | 2.36710600  |
| C  | -3.39891500 | 1.53165100  | 1.71935600  |
| H  | -4.32571700 | 2.10223900  | 1.59932800  |
| H  | -2.95518500 | 1.76480900  | 2.68962900  |
| H  | -2.26598900 | 0.60950700  | 0.68845000  |
| H  | 2.29122800  | 1.48159700  | 2.12664000  |
| N  | 3.04246100  | 1.44870900  | 2.83401300  |
| Si | 2.93401300  | 0.04770700  | 3.86610500  |
| Si | 4.25840300  | 2.68233100  | 2.62571100  |
| C  | 5.97743600  | 1.94639900  | 2.29336500  |
| H  | 6.72712000  | 2.73480700  | 2.14458400  |
| H  | 6.32186200  | 1.32476300  | 3.12951800  |
| H  | 5.97024200  | 1.31334000  | 1.39765900  |
| C  | 3.75376300  | 3.75120400  | 1.14489900  |
| H  | 2.77029700  | 4.20995700  | 1.30485000  |

|   |             |             |             |
|---|-------------|-------------|-------------|
| H | 4.47585300  | 4.56118200  | 0.98084900  |
| H | 3.69520400  | 3.16178300  | 0.22258100  |
| C | 4.40333300  | 3.80649700  | 4.14910400  |
| H | 4.71418200  | 3.24928100  | 5.04080000  |
| H | 5.14215300  | 4.60212300  | 3.98503500  |
| H | 3.44229600  | 4.28356600  | 4.37729800  |
| C | 3.49709700  | -1.53329900 | 2.97600500  |
| H | 3.39063600  | -2.42276800 | 3.61129000  |
| H | 2.89763200  | -1.69032600 | 2.06983300  |
| H | 4.54595400  | -1.46085600 | 2.66363000  |
| C | 4.00880500  | 0.27473500  | 5.41164300  |
| H | 3.94586900  | -0.61662000 | 6.04880000  |
| H | 5.06748500  | 0.42411800  | 5.16734000  |
| H | 3.67881200  | 1.13272500  | 6.00877100  |
| C | 1.13283100  | -0.20923400 | 4.40135600  |
| H | 0.76813500  | 0.64365100  | 4.98651100  |
| H | 0.47857400  | -0.31812300 | 3.52671100  |
| H | 1.02161600  | -1.11319200 | 5.01417900  |
| C | 4.84063400  | -1.13134600 | -1.57983800 |
| C | 5.27899900  | -2.46452000 | -1.62103800 |
| C | 5.80992200  | -0.11749700 | -1.46996400 |
| C | 6.64046900  | -2.77463300 | -1.57049100 |
| H | 4.56273000  | -3.27823200 | -1.69340200 |
| C | 7.16857600  | -0.42717200 | -1.42386600 |
| H | 5.50004100  | 0.92341500  | -1.43213800 |
| C | 7.59048400  | -1.75822700 | -1.47439300 |
| H | 6.95553000  | -3.81438900 | -1.60895200 |
| H | 7.89884800  | 0.37418200  | -1.34819300 |
| H | 8.64923600  | -1.99941000 | -1.43592600 |
| C | 2.94107000  | 0.71329800  | -2.71496200 |
| C | 3.47004700  | 0.64428500  | -4.01518400 |
| C | 2.27629900  | 1.88237500  | -2.30996400 |
| C | 3.32475300  | 1.71526900  | -4.89607100 |
| H | 4.00656900  | -0.24497000 | -4.33592100 |
| C | 2.13470500  | 2.95600100  | -3.19571000 |
| H | 1.87394900  | 1.95133200  | -1.30087600 |
| C | 2.65435000  | 2.87266500  | -4.48744900 |
| H | 3.73618200  | 1.64991700  | -5.90016900 |
| H | 1.62047500  | 3.85707600  | -2.87202600 |
| H | 2.54385500  | 3.70762000  | -5.17452300 |
| C | -1.17614900 | -2.65913700 | -2.09758100 |
| C | -2.03328700 | -1.57728500 | -2.33514500 |
| C | -1.28736700 | -3.80865900 | -2.89926300 |
| C | -2.98497700 | -1.63620700 | -3.35590400 |
| H | -1.98489200 | -0.69663600 | -1.70316900 |
| C | -2.22517500 | -3.85993100 | -3.92798000 |
| H | -0.65450700 | -4.67224700 | -2.71254500 |
| C | -3.07488700 | -2.77259100 | -4.15761400 |
| H | -3.66585400 | -0.80235100 | -3.49348900 |
| H | -2.30194100 | -4.75202100 | -4.54388300 |

|   |             |             |             |
|---|-------------|-------------|-------------|
| H | -3.81503400 | -2.82185000 | -4.95180500 |
| C | -0.47238100 | -3.93179200 | 0.41974700  |
| C | -1.82863600 | -4.03322000 | 0.77741400  |
| C | 0.45499400  | -4.81996300 | 0.98576100  |
| C | -2.24037300 | -5.01707300 | 1.67620100  |
| H | -2.56681100 | -3.35023700 | 0.36430400  |
| C | 0.03364100  | -5.80048600 | 1.88656300  |
| H | 1.50905000  | -4.76003500 | 0.73381600  |
| C | -1.31413900 | -5.90249900 | 2.23253900  |
| H | -3.29203200 | -5.08660600 | 1.94027500  |
| H | 0.76220700  | -6.48415200 | 2.31416400  |
| H | -1.64040700 | -6.66689500 | 2.93274600  |

**ADD4-N-real**

|    |             |             |             |
|----|-------------|-------------|-------------|
| Ag | -0.17796100 | -0.16040600 | -0.11414200 |
| P  | -0.23472500 | -2.44932800 | -0.81337100 |
| C  | -1.96231200 | -3.14288400 | -0.96554100 |
| H  | -1.87625000 | -4.21510100 | -1.18230300 |
| H  | -2.43288200 | -2.66652400 | -1.83350700 |
| C  | -2.81260500 | -2.91267400 | 0.30216300  |
| H  | -3.63141200 | -3.64041900 | 0.32865100  |
| H  | -2.21448900 | -3.09188100 | 1.20179000  |
| P  | -3.49211800 | -1.15057500 | 0.41479800  |
| C  | 0.30076400  | 2.64554900  | 0.94844400  |
| H  | 0.44390000  | 3.29656200  | 0.06101300  |
| H  | 0.02520700  | 3.33133400  | 1.77431500  |
| C  | 1.68850600  | 2.06616600  | 1.32577300  |
| H  | 2.37147700  | 2.92659300  | 1.46218300  |
| O  | -0.69683100 | 1.70686200  | 0.74010300  |
| N  | 2.19183100  | 1.18751800  | 0.25177600  |
| H  | 2.85092300  | 0.50502400  | 0.62135500  |
| C  | 1.64064900  | 1.29606500  | 2.66239000  |
| H  | 1.10724300  | 1.92911600  | 3.38229000  |
| H  | 1.03043300  | 0.39568100  | 2.52727100  |
| C  | 3.00370700  | 0.93501900  | 3.21714300  |
| C  | 3.53354200  | -0.35728400 | 3.08747100  |
| C  | 3.78435500  | 1.90663400  | 3.86481700  |
| C  | 4.80398600  | -0.66895200 | 3.58166200  |
| H  | 2.94792800  | -1.13200600 | 2.59786700  |
| C  | 5.05009600  | 1.60031100  | 4.36432300  |
| H  | 3.38744900  | 2.91248400  | 3.98602500  |
| C  | 5.56680000  | 0.30839500  | 4.22274700  |
| H  | 5.19298700  | -1.67698300 | 3.46519000  |
| H  | 5.62967200  | 2.36652400  | 4.87354000  |
| H  | 6.55025900  | 0.06518600  | 4.61641300  |
| C  | 7.25926900  | 2.08187500  | 0.75759900  |
| C  | 6.22695100  | 1.23642200  | 0.34722900  |
| C  | 6.05126300  | 1.00407700  | -1.01890400 |
| C  | 6.88936500  | 1.58266100  | -1.97626700 |

|    |             |             |             |
|----|-------------|-------------|-------------|
| C  | 7.91600500  | 2.42574900  | -1.55143400 |
| C  | 8.09706900  | 2.67727500  | -0.18807800 |
| H  | 7.40478100  | 2.26745700  | 1.81756300  |
| H  | 5.58413100  | 0.75066300  | 1.07363700  |
| H  | 6.74990000  | 1.35543400  | -3.02829400 |
| H  | 8.57849700  | 2.87955000  | -2.28289600 |
| H  | 8.89916100  | 3.33415400  | 0.13720000  |
| S  | 4.71907200  | -0.07519800 | -1.56591700 |
| O  | 5.14014400  | -0.71908500 | -2.82450400 |
| O  | 4.30881500  | -0.90509600 | -0.41130400 |
| C  | 3.32950900  | 1.03536300  | -1.97339200 |
| H  | 3.67380100  | 1.63745400  | -2.81961700 |
| C  | 2.82888000  | 1.92577000  | -0.83732600 |
| H  | 3.65543400  | 2.56597300  | -0.47934500 |
| H  | 2.08656800  | 2.59901800  | -1.27832800 |
| H  | 2.54807600  | 0.35209400  | -2.32285000 |
| H  | -2.00781700 | 2.70324000  | -0.31394100 |
| N  | -2.60502300 | 3.30206400  | -0.91049900 |
| Si | -2.47693600 | 2.94136600  | -2.60863000 |
| Si | -3.70330600 | 4.31499800  | -0.00806100 |
| C  | -5.51911300 | 3.94396500  | -0.42754500 |
| H  | -6.20118200 | 4.57053700  | 0.16213000  |
| H  | -5.74084700 | 4.12909900  | -1.48626200 |
| H  | -5.76167600 | 2.89426500  | -0.22128700 |
| C  | -3.42450100 | 3.99245000  | 1.83661700  |
| H  | -2.38465100 | 4.19435300  | 2.11959900  |
| H  | -4.06974500 | 4.63588000  | 2.44840100  |
| H  | -3.63983100 | 2.95091200  | 2.10012000  |
| C  | -3.40441700 | 6.16085700  | -0.34192700 |
| H  | -3.56799900 | 6.41720100  | -1.39525300 |
| H  | -4.07729000 | 6.78762200  | 0.25823300  |
| H  | -2.37369300 | 6.43959900  | -0.09060300 |
| C  | -3.47602600 | 1.40559200  | -3.10532400 |
| H  | -3.33100500 | 1.14306700  | -4.16203700 |
| H  | -3.17871000 | 0.54482500  | -2.49348600 |
| H  | -4.54933200 | 1.56159000  | -2.94148900 |
| C  | -3.08690300 | 4.40410100  | -3.65100500 |
| H  | -3.00689000 | 4.16970100  | -4.72030600 |
| H  | -4.13762800 | 4.64694500  | -3.45115500 |
| H  | -2.49477100 | 5.30722800  | -3.46243100 |
| C  | -0.65786900 | 2.60437400  | -3.03886600 |
| H  | -0.04309300 | 3.49899700  | -2.87963000 |
| H  | -0.25915300 | 1.80371700  | -2.40172800 |
| H  | -0.54160200 | 2.29198800  | -4.08482900 |
| C  | -5.27337100 | -1.40096800 | -0.02916700 |
| C  | -5.68645700 | -2.36234800 | -0.96591400 |
| C  | -6.23841300 | -0.50727300 | 0.47014100  |
| C  | -7.02001400 | -2.44279300 | -1.37430700 |
| H  | -4.96923200 | -3.05992900 | -1.39051300 |
| C  | -7.57010300 | -0.58958600 | 0.06525600  |

|   |             |             |             |
|---|-------------|-------------|-------------|
| H | -5.94736200 | 0.25186800  | 1.19100800  |
| C | -7.96817500 | -1.55939600 | -0.85834900 |
| H | -7.31544300 | -3.19969900 | -2.09674000 |
| H | -8.29857100 | 0.10645600  | 0.47318300  |
| H | -9.00573000 | -1.62221100 | -1.17508700 |
| C | -3.57414700 | -0.91419500 | 2.24773300  |
| C | -4.35257900 | -1.72236300 | 3.09481500  |
| C | -2.79224600 | 0.11110000  | 2.80665600  |
| C | -4.34433600 | -1.51771100 | 4.47403100  |
| H | -4.97721100 | -2.50542800 | 2.67250400  |
| C | -2.79040400 | 0.31262400  | 4.19200200  |
| H | -2.18363500 | 0.74911500  | 2.16454900  |
| C | -3.56095600 | -0.49848800 | 5.02509300  |
| H | -4.95067800 | -2.14900000 | 5.11901300  |
| H | -2.18857100 | 1.11290400  | 4.61511000  |
| H | -3.55863800 | -0.33614300 | 6.10010000  |
| C | 0.54341100  | -3.61774900 | 0.38116600  |
| C | 0.70868000  | -3.22465500 | 1.71791400  |
| C | 0.93186600  | -4.91205700 | -0.00056400 |
| C | 1.24300200  | -4.10958800 | 2.65756300  |
| H | 0.41975100  | -2.22236200 | 2.02380900  |
| C | 1.47170100  | -5.79190200 | 0.93712800  |
| H | 0.82477200  | -5.22858400 | -1.03435400 |
| C | 1.62659700  | -5.39318600 | 2.26752900  |
| H | 1.36379100  | -3.79104800 | 3.68928500  |
| H | 1.77460500  | -6.78874000 | 0.62820500  |
| H | 2.04943600  | -6.08025600 | 2.99545300  |
| C | 0.57125400  | -2.84159500 | -2.41829500 |
| C | 1.95891700  | -2.63623100 | -2.52315300 |
| C | -0.13846400 | -3.27276700 | -3.54886300 |
| C | 2.62005400  | -2.85700900 | -3.73085600 |
| H | 2.53049100  | -2.30729100 | -1.65868300 |
| C | 0.52709300  | -3.49277400 | -4.75819100 |
| H | -1.20923800 | -3.44145400 | -3.50182900 |
| C | 1.90310900  | -3.28469200 | -4.85207400 |
| H | 3.68818300  | -2.67250400 | -3.78931200 |
| H | -0.03620600 | -3.82667200 | -5.62556300 |
| H | 2.41602500  | -3.45163600 | -5.79540100 |

**TS3-N-real**

|    |            |             |             |
|----|------------|-------------|-------------|
| Ag | 0.97090000 | 0.96271500  | -0.21345200 |
| P  | 0.99474100 | -0.68911900 | 1.53143900  |
| C  | 2.62957100 | -1.20550900 | 2.29991500  |
| H  | 2.38228200 | -1.70588900 | 3.24432600  |
| H  | 3.17316300 | -0.28979800 | 2.55670500  |
| C  | 3.51215700 | -2.13540800 | 1.44735800  |
| H  | 4.24956300 | -2.62330800 | 2.09694400  |
| H  | 2.90990700 | -2.94521400 | 1.02110900  |
| P  | 4.36641300 | -1.31412700 | -0.00976900 |

|    |              |             |             |
|----|--------------|-------------|-------------|
| C  | -1.74187900  | 1.97628000  | -2.41554400 |
| H  | -2.02937700  | 2.88234800  | -1.84436700 |
| H  | -1.81336000  | 2.26037100  | -3.48602400 |
| C  | -2.84336900  | 0.91826800  | -2.18432500 |
| H  | -3.75257600  | 1.30009600  | -2.69223600 |
| O  | -0.45862700  | 1.54838900  | -2.10331500 |
| N  | -3.11876800  | 0.71573000  | -0.75308700 |
| H  | -3.43243100  | -0.23583300 | -0.57802700 |
| C  | -2.47232500  | -0.41852100 | -2.86026800 |
| H  | -2.08479700  | -0.18667600 | -3.85953700 |
| H  | -1.64392900  | -0.86425600 | -2.30109500 |
| C  | -3.62916200  | -1.38984800 | -2.97642700 |
| C  | -3.80417500  | -2.43873700 | -2.06126800 |
| C  | -4.57587800  | -1.24826000 | -4.00440200 |
| C  | -4.89107900  | -3.31273000 | -2.16388400 |
| H  | -3.08311800  | -2.57807400 | -1.25985500 |
| C  | -5.66017400  | -2.11894100 | -4.11395900 |
| H  | -4.45404300  | -0.44742600 | -4.73093300 |
| C  | -5.82342000  | -3.15677900 | -3.19104500 |
| H  | -5.00397400  | -4.11596500 | -1.44026900 |
| H  | -6.37368300  | -1.99357200 | -4.92486900 |
| H  | -6.66304000  | -3.84165400 | -3.27875500 |
| C  | -8.21777600  | -0.60572800 | -0.77812100 |
| C  | -6.95590400  | -0.64335700 | -0.18221800 |
| C  | -6.77262400  | -0.00459100 | 1.04629900  |
| C  | -7.82118700  | 0.65295400  | 1.69509700  |
| C  | -9.07701700  | 0.68149800  | 1.08862600  |
| C  | -9.27275800  | 0.05721100  | -0.14689900 |
| H  | -8.36986000  | -1.10021000 | -1.73296100 |
| H  | -6.13481900  | -1.17397000 | -0.65248000 |
| H  | -7.65577600  | 1.11022100  | 2.66526500  |
| H  | -9.90336600  | 1.18409300  | 1.58321800  |
| H  | -10.25323000 | 0.08218600  | -0.61470700 |
| S  | -5.14890400  | -0.03471700 | 1.82421600  |
| O  | -5.34642100  | 0.08183800  | 3.28299400  |
| O  | -4.40250800  | -1.18517500 | 1.27074400  |
| C  | -4.32576800  | 1.49927200  | 1.27948400  |
| H  | -4.94365700  | 2.31170700  | 1.67438100  |
| C  | -4.10661400  | 1.64511800  | -0.22646000 |
| H  | -5.08200500  | 1.59220700  | -0.74927600 |
| H  | -3.73767600  | 2.66613300  | -0.38110500 |
| H  | -3.37136000  | 1.48403000  | 1.81588900  |
| H  | 0.40972500   | 2.46193700  | -1.82498800 |
| N  | 1.43896600   | 2.93615400  | -1.33908100 |
| Si | 1.22637300   | 4.28205700  | -0.23381100 |
| Si | 2.67233600   | 2.83135300  | -2.59405000 |
| C  | 4.37718300   | 3.38851700  | -1.96785100 |
| H  | 5.13236900   | 3.25935200  | -2.75469200 |
| H  | 4.38989700   | 4.44618500  | -1.67706100 |
| H  | 4.69688500   | 2.80126600  | -1.09883600 |



|   |             |             |             |
|---|-------------|-------------|-------------|
| C | 2.79395100  | 1.04531400  | -3.20686500 |
| H | 3.18411700  | 0.37336800  | -2.43247700 |
| H | 1.79977100  | 0.68657100  | -3.49878700 |
| H | 3.45534600  | 0.97255300  | -4.08069500 |
| C | 2.20466900  | 3.90967200  | -4.08675300 |
| H | 2.15730600  | 4.97474700  | -3.83265800 |
| H | 2.93169900  | 3.79426500  | -4.90148500 |
| H | 1.22163700  | 3.61759000  | -4.47674200 |
| C | 2.49776800  | 4.24326300  | 1.17755100  |
| H | 2.35410000  | 5.09238500  | 1.85880700  |
| H | 2.39822500  | 3.32239700  | 1.76674000  |
| H | 3.52726000  | 4.28566300  | 0.80357600  |
| C | 1.36509400  | 5.97766700  | -1.08513800 |
| H | 1.16619300  | 6.78562700  | -0.36869900 |
| H | 2.36265600  | 6.15341000  | -1.50576700 |
| H | 0.64029400  | 6.07381200  | -1.90263900 |
| C | -0.50098800 | 4.18651500  | 0.54697800  |
| H | -1.28613600 | 4.33563700  | -0.20367400 |
| H | -0.68083300 | 3.21444100  | 1.02332500  |
| H | -0.61843600 | 4.96300300  | 1.31436900  |
| C | 0.24910300  | -2.31095000 | 1.09026500  |
| C | -0.03967800 | -3.28580300 | 2.06039900  |
| C | 0.02859900  | -2.60901500 | -0.26211400 |
| C | -0.53877600 | -4.53122000 | 1.68178300  |
| H | 0.11112400  | -3.06811000 | 3.11418400  |
| C | -0.46558400 | -3.86044600 | -0.64039200 |
| H | 0.23917300  | -1.85737400 | -1.01845000 |
| C | -0.74993800 | -4.82112200 | 0.33071100  |
| H | -0.76585000 | -5.27462700 | 2.44098200  |
| H | -0.63503700 | -4.07739000 | -1.69125800 |
| H | -1.13904500 | -5.79249700 | 0.03793700  |
| C | 0.06171300  | -0.10916100 | 3.01134300  |
| C | 0.70990200  | 0.65734400  | 3.99454700  |
| C | -1.31661400 | -0.35072900 | 3.13789700  |
| C | 0.00021800  | 1.15440800  | 5.08866600  |
| H | 1.77069600  | 0.87650000  | 3.91425200  |
| C | -2.02322300 | 0.14614000  | 4.23646500  |
| H | -1.84846300 | -0.92632700 | 2.38584100  |
| C | -1.36593600 | 0.89764100  | 5.21321600  |
| H | 0.51892100  | 1.74155500  | 5.84193900  |
| H | -3.08875300 | -0.04912100 | 4.31677400  |
| H | -1.91812500 | 1.28322800  | 6.06597400  |
| C | 5.24001000  | -2.79905100 | -0.69846800 |
| C | 4.69466800  | -3.39028800 | -1.84906300 |
| C | 6.39280700  | -3.36561400 | -0.13189500 |
| C | 5.27377000  | -4.53097500 | -2.40912200 |
| H | 3.81558800  | -2.94881900 | -2.31295400 |
| C | 6.97712000  | -4.50033500 | -0.69598000 |
| H | 6.84292100  | -2.91136600 | 0.74662100  |
| C | 6.41695400  | -5.08747600 | -1.83349200 |

|   |            |             |             |
|---|------------|-------------|-------------|
| H | 4.83818700 | -4.97672000 | -3.29956100 |
| H | 7.87189500 | -4.92576700 | -0.24847900 |
| H | 6.87467500 | -5.97003000 | -2.27264900 |
| C | 5.74577900 | -0.37377000 | 0.79478400  |
| C | 6.44789900 | 0.52835800  | -0.02507800 |
| C | 6.11968400 | -0.46910800 | 2.14494900  |
| C | 7.49901300 | 1.29284500  | 0.48018900  |
| H | 6.16461200 | 0.63322100  | -1.06944500 |
| C | 7.16400000 | 0.30658000  | 2.65644100  |
| H | 5.60295100 | -1.15097200 | 2.81382400  |
| C | 7.85853200 | 1.18637800  | 1.82587500  |
| H | 8.02880200 | 1.97976300  | -0.17423900 |
| H | 7.43497600 | 0.21861400  | 3.70557600  |
| H | 8.66992100 | 1.78907100  | 2.22487100  |

### ADD5-N-real

|    |             |             |             |
|----|-------------|-------------|-------------|
| Ag | -1.61776900 | 0.41667600  | -0.73473000 |
| P  | -1.21190000 | -1.67235600 | 0.37040000  |
| C  | -2.71909600 | -2.67119300 | 0.85346200  |
| H  | -2.36810600 | -3.59879600 | 1.32146500  |
| H  | -3.21963400 | -2.96205100 | -0.07661800 |
| C  | -3.71122400 | -1.96174800 | 1.78875000  |
| H  | -4.45666300 | -2.69070000 | 2.12856600  |
| H  | -3.19022900 | -1.60474100 | 2.68419500  |
| P  | -4.57690800 | -0.47715700 | 1.00597100  |
| C  | 2.00614300  | 2.88751100  | -0.89778700 |
| H  | 2.03936100  | 2.53592200  | -1.94036700 |
| H  | 2.08465300  | 3.98927800  | -0.92494700 |
| C  | 3.23512700  | 2.34172900  | -0.15263200 |
| H  | 4.11174900  | 2.88468600  | -0.55753800 |
| O  | 0.81580700  | 2.48177200  | -0.25832200 |
| N  | 3.38606400  | 0.89689500  | -0.36347300 |
| H  | 3.75922900  | 0.43960700  | 0.46418000  |
| C  | 3.15016900  | 2.66797700  | 1.35526500  |
| H  | 2.85061100  | 3.71835400  | 1.45531300  |
| H  | 2.34067500  | 2.07017400  | 1.78449300  |
| C  | 4.44280200  | 2.43581300  | 2.11063400  |
| C  | 4.63917000  | 1.28558700  | 2.88893700  |
| C  | 5.48602800  | 3.37289600  | 2.03987900  |
| C  | 5.84092600  | 1.07518200  | 3.57213700  |
| H  | 3.84506300  | 0.54664200  | 2.96332800  |
| C  | 6.68584800  | 3.16975200  | 2.72163700  |
| H  | 5.34906000  | 4.27663300  | 1.44956400  |
| C  | 6.86825600  | 2.01706300  | 3.49190300  |
| H  | 5.96964500  | 0.17567900  | 4.16846200  |
| H  | 7.47519900  | 3.91489100  | 2.66026300  |
| H  | 7.79849600  | 1.86053600  | 4.03204800  |
| C  | 8.60437600  | 0.05800800  | 0.17938400  |
| C  | 7.28293300  | -0.38568600 | 0.25580500  |

|    |             |             |             |
|----|-------------|-------------|-------------|
| C  | 6.85254700  | -1.37478400 | -0.63105100 |
| C  | 7.71395400  | -1.93751500 | -1.57669000 |
| C  | 9.03185500  | -1.48511700 | -1.64155300 |
| C  | 9.47396600  | -0.48695600 | -0.76802200 |
| H  | 8.94825400  | 0.82623700  | 0.86568500  |
| H  | 6.60389400  | 0.01378600  | 1.00146900  |
| H  | 7.35922600  | -2.72904700 | -2.22894200 |
| H  | 9.71499300  | -1.91668900 | -2.36758700 |
| H  | 10.50197300 | -0.13910000 | -0.82236900 |
| S  | 5.14887500  | -1.95265000 | -0.54847300 |
| O  | 5.12504900  | -3.34763700 | -1.03072900 |
| O  | 4.62290900  | -1.62406700 | 0.79320100  |
| C  | 4.24577000  | -0.95339300 | -1.77962000 |
| H  | 4.72146600  | -1.17935100 | -2.73891300 |
| C  | 4.20436000  | 0.55252300  | -1.51486000 |
| H  | 5.23776300  | 0.94756900  | -1.45816600 |
| H  | 3.75750400  | 1.00551000  | -2.40891300 |
| H  | 3.23772300  | -1.38118600 | -1.77144200 |
| H  | 0.06087700  | 2.47804100  | -0.90293500 |
| N  | -1.63218200 | 2.27672000  | -1.78222100 |
| Si | -1.49755300 | 2.02468600  | -3.49370000 |
| Si | -2.48409000 | 3.57284000  | -0.98690900 |
| C  | -4.29990500 | 3.73756100  | -1.54054800 |
| H  | -4.80693600 | 4.54671700  | -0.99824700 |
| H  | -4.38109500 | 3.96011900  | -2.61216200 |
| H  | -4.85828600 | 2.81201900  | -1.35079700 |
| C  | -2.47297700 | 3.30407600  | 0.89281700  |
| H  | -3.02202700 | 2.39867200  | 1.17973100  |
| H  | -1.44268300 | 3.21417000  | 1.25864400  |
| H  | -2.94027600 | 4.15270600  | 1.41038300  |
| C  | -1.65053000 | 5.25911300  | -1.28336800 |
| H  | -1.65998700 | 5.55694800  | -2.33749900 |
| H  | -2.16008000 | 6.04665400  | -0.71226500 |
| H  | -0.60467500 | 5.23562700  | -0.95245300 |
| C  | -3.03370700 | 1.18629600  | -4.25510200 |
| H  | -2.92405000 | 1.05495000  | -5.34016600 |
| H  | -3.19803400 | 0.19284600  | -3.81677600 |
| H  | -3.94052100 | 1.77909100  | -4.08116800 |
| C  | -1.22348800 | 3.63292900  | -4.47722000 |
| H  | -1.05789400 | 3.40614400  | -5.53876700 |
| H  | -2.08809600 | 4.30524000  | -4.41871200 |
| H  | -0.34937900 | 4.18747400  | -4.11529700 |
| C  | -0.02360700 | 0.88484800  | -3.88524200 |
| H  | 0.92845100  | 1.34375600  | -3.59109600 |
| H  | -0.10038500 | -0.07410100 | -3.35625500 |
| H  | 0.02900700  | 0.66813700  | -4.96069000 |
| C  | -5.80944100 | -0.09253600 | 2.33316800  |
| C  | -7.17501100 | 0.09043300  | 2.06134500  |
| C  | -5.35227500 | 0.15931100  | 3.63948600  |
| C  | -8.05761400 | 0.48703600  | 3.06824100  |

|   |             |             |             |
|---|-------------|-------------|-------------|
| H | -7.55566700 | -0.07998100 | 1.05917300  |
| C | -6.23598200 | 0.54798200  | 4.64605500  |
| H | -4.29598000 | 0.06071800  | 3.87794500  |
| C | -7.59419700 | 0.71165400  | 4.36493300  |
| H | -9.11111700 | 0.61924100  | 2.83505600  |
| H | -5.86050500 | 0.72911900  | 5.64992100  |
| H | -8.28230700 | 1.01869400  | 5.14786700  |
| C | -5.58523300 | -1.32924000 | -0.29255100 |
| C | -5.47241900 | -0.86041800 | -1.61094700 |
| C | -6.41930500 | -2.43321300 | -0.04050100 |
| C | -6.16966600 | -1.47886800 | -2.65321900 |
| H | -4.83274800 | -0.00773700 | -1.82244500 |
| C | -7.11612400 | -3.05046300 | -1.07903400 |
| H | -6.53584800 | -2.80549000 | 0.97427700  |
| C | -6.99075700 | -2.57480200 | -2.38842400 |
| H | -6.06842300 | -1.10049700 | -3.66682100 |
| H | -7.75862400 | -3.90165600 | -0.86837200 |
| H | -7.53456800 | -3.05728700 | -3.19635500 |
| C | -0.26089300 | -2.88748700 | -0.63425000 |
| C | 1.08132000  | -3.19565200 | -0.36520700 |
| C | -0.88387100 | -3.47069900 | -1.75135800 |
| C | 1.77967200  | -4.08613600 | -1.18673500 |
| H | 1.59239600  | -2.74163800 | 0.47826600  |
| C | -0.18716600 | -4.36446400 | -2.56398100 |
| H | -1.91358500 | -3.22364200 | -1.99833100 |
| C | 1.14527300  | -4.67458300 | -2.28218200 |
| H | 2.82282700  | -4.30128100 | -0.97517500 |
| H | -0.68514800 | -4.81183800 | -3.42014100 |
| H | 1.69037700  | -5.36638400 | -2.91858400 |
| C | -0.30177100 | -1.48011100 | 1.95419800  |
| C | -0.09946800 | -2.56300600 | 2.82798600  |
| C | 0.17258400  | -0.21045000 | 2.31835300  |
| C | 0.55092500  | -2.37679500 | 4.04658000  |
| H | -0.43903000 | -3.55833500 | 2.55467600  |
| C | 0.81741800  | -0.02669900 | 3.54508400  |
| H | 0.05311000  | 0.63086600  | 1.64034200  |
| C | 1.00416700  | -1.10537300 | 4.40996700  |
| H | 0.70372200  | -3.22227700 | 4.71169800  |
| H | 1.17223300  | 0.96231100  | 3.82099500  |
| H | 1.50483600  | -0.95920300 | 5.36329300  |

#### TS1'-N-real

|    |             |             |             |
|----|-------------|-------------|-------------|
| Ag | -1.45688600 | 0.55118600  | -0.73232100 |
| P  | -1.36531800 | -1.83682400 | -0.51231900 |
| C  | -3.00293500 | -2.69320800 | -0.22886300 |
| H  | -2.81632100 | -3.77360700 | -0.26810700 |
| H  | -3.65618100 | -2.44806400 | -1.07407500 |
| C  | -3.69985800 | -2.33874800 | 1.09542700  |
| H  | -4.51880500 | -3.04801300 | 1.26301100  |

|    |             |             |             |
|----|-------------|-------------|-------------|
| H  | -3.00179000 | -2.46074500 | 1.93041800  |
| P  | -4.36526300 | -0.57359400 | 1.15543900  |
| C  | 2.30294000  | 3.19837000  | -1.09514500 |
| H  | 2.29865400  | 2.90867600  | -2.15767500 |
| H  | 2.09608500  | 4.27959700  | -1.04194500 |
| C  | 3.69836800  | 2.93314800  | -0.51408200 |
| H  | 4.44568900  | 3.44264800  | -1.13537400 |
| O  | 1.38102700  | 2.44425800  | -0.34269100 |
| N  | 3.94162600  | 1.47776600  | -0.66093600 |
| H  | 3.18317500  | 0.94459600  | -0.22166100 |
| C  | 3.79165700  | 3.44880800  | 0.94245100  |
| H  | 3.44762300  | 4.49220200  | 0.92052100  |
| H  | 3.06120100  | 2.90094300  | 1.54557600  |
| C  | 5.16123800  | 3.39470300  | 1.58758000  |
| C  | 5.40665600  | 2.56294200  | 2.68795300  |
| C  | 6.21340700  | 4.19273700  | 1.11185800  |
| C  | 6.66692200  | 2.51568100  | 3.28856900  |
| H  | 4.59895900  | 1.94876800  | 3.08028300  |
| C  | 7.47474900  | 4.14772400  | 1.70634300  |
| H  | 6.04139400  | 4.86271200  | 0.27157500  |
| C  | 7.70677100  | 3.30574000  | 2.79706400  |
| H  | 6.83400300  | 1.86306800  | 4.14152400  |
| H  | 8.27511900  | 4.77505700  | 1.32257400  |
| H  | 8.68807400  | 3.27145200  | 3.26240900  |
| C  | 6.27854900  | -3.47807300 | 2.02683200  |
| C  | 5.40866400  | -2.74236600 | 1.21850500  |
| C  | 5.63511300  | -2.68969500 | -0.15862400 |
| C  | 6.70986500  | -3.37250100 | -0.73609100 |
| C  | 7.57284700  | -4.10424500 | 0.07897700  |
| C  | 7.36110500  | -4.15397600 | 1.46032500  |
| H  | 6.10583200  | -3.52884100 | 3.09879500  |
| H  | 4.54469700  | -2.23460400 | 1.63407500  |
| H  | 6.84959300  | -3.34442900 | -1.81228700 |
| H  | 8.40675300  | -4.64241300 | -0.36376700 |
| H  | 8.03528200  | -4.72633700 | 2.09198900  |
| S  | 4.55074500  | -1.69083000 | -1.21434900 |
| O  | 4.41565100  | -2.44527300 | -2.47936100 |
| O  | 3.34201400  | -1.42301000 | -0.38045400 |
| C  | 5.28456700  | -0.14854000 | -1.54022700 |
| H  | 6.19912100  | -0.25199600 | -2.12207900 |
| C  | 5.27808900  | 0.81884000  | -0.36577200 |
| H  | 5.30662500  | 0.41668400  | 0.64936200  |
| H  | 6.06298300  | 1.56986900  | -0.46969800 |
| H  | 4.13460700  | 0.85600300  | -1.74262700 |
| H  | 0.44911100  | 2.55300400  | -0.70107600 |
| N  | -1.32483300 | 2.65908500  | -1.07592000 |
| Si | -1.58512600 | 3.00974000  | -2.76209000 |
| Si | -1.86234400 | 3.63683900  | 0.26673200  |
| C  | -1.58458500 | 2.69858100  | 1.89509200  |
| H  | -0.53493100 | 2.39139000  | 1.98614200  |

|   |             |             |             |
|---|-------------|-------------|-------------|
| H | -1.82331100 | 3.33177000  | 2.76015200  |
| H | -2.21526100 | 1.80294600  | 1.95700900  |
| C | -0.87003800 | 5.25550500  | 0.41273100  |
| H | 0.19835300  | 5.04068300  | 0.53752300  |
| H | -0.98140200 | 5.90064200  | -0.46571900 |
| H | -1.19668300 | 5.83020600  | 1.28949600  |
| C | -3.70420700 | 4.11305400  | 0.18080600  |
| H | -4.34484100 | 3.22323100  | 0.14083400  |
| H | -3.99968300 | 4.69354000  | 1.06486100  |
| H | -3.92967700 | 4.72436400  | -0.70210700 |
| C | -1.25274800 | 4.83444500  | -3.19943100 |
| H | -0.24215300 | 5.14575800  | -2.90817400 |
| H | -1.34695000 | 4.98789300  | -4.28257700 |
| H | -1.96078900 | 5.51588600  | -2.71204600 |
| C | -0.42014300 | 1.96076800  | -3.83742700 |
| H | -0.57836000 | 2.17169100  | -4.90342200 |
| H | 0.63483000  | 2.16189900  | -3.61414000 |
| H | -0.58318300 | 0.88574200  | -3.68731000 |
| C | -3.35753000 | 2.62692800  | -3.35090300 |
| H | -3.59195900 | 1.56070000  | -3.23233400 |
| H | -4.10257500 | 3.19667200  | -2.78193100 |
| H | -3.48754200 | 2.87619900  | -4.41268100 |
| C | -5.78245400 | -0.72218700 | -0.02708200 |
| C | -5.83007200 | 0.18138300  | -1.10020900 |
| C | -6.78091000 | -1.70805200 | 0.06636300  |
| C | -6.84392300 | 0.10102300  | -2.05966900 |
| H | -5.06709000 | 0.95035900  | -1.18637300 |
| C | -7.79423200 | -1.78777800 | -0.88824400 |
| H | -6.77540600 | -2.40901200 | 0.89716200  |
| C | -7.82594700 | -0.88375400 | -1.95500000 |
| H | -6.86177300 | 0.80850800  | -2.88418400 |
| H | -8.56046200 | -2.55393400 | -0.80110300 |
| H | -8.61572500 | -0.94807900 | -2.69885200 |
| C | -5.17395600 | -0.59570500 | 2.82145300  |
| C | -4.40138600 | -0.93023300 | 3.94866500  |
| C | -6.49436600 | -0.16401300 | 3.02624400  |
| C | -4.94183500 | -0.86756100 | 5.23274700  |
| H | -3.36497400 | -1.23715500 | 3.82959700  |
| C | -7.03229400 | -0.09517100 | 4.31321200  |
| H | -7.11015500 | 0.11651000  | 2.17747000  |
| C | -6.26187400 | -0.45173400 | 5.42041700  |
| H | -4.32830700 | -1.13954500 | 6.08784200  |
| H | -8.05831800 | 0.23792400  | 4.44748600  |
| H | -6.68260100 | -0.39968600 | 6.42094200  |
| C | -0.35507200 | -2.41696400 | 0.90993200  |
| C | 0.01227800  | -3.76606800 | 1.04242000  |
| C | 0.02302900  | -1.50442000 | 1.90529500  |
| C | 0.73639500  | -4.19242300 | 2.15435700  |
| H | -0.25060000 | -4.48006600 | 0.26669300  |
| C | 0.74407300  | -1.93529700 | 3.02167000  |

|   |             |             |             |
|---|-------------|-------------|-------------|
| H | -0.23691900 | -0.45395400 | 1.80245600  |
| C | 1.09993400  | -3.27828300 | 3.14745400  |
| H | 1.02264100  | -5.23683000 | 2.24328800  |
| H | 1.03224600  | -1.21809000 | 3.78548400  |
| H | 1.66472500  | -3.61376000 | 4.01327100  |
| C | -0.66924600 | -2.69615200 | -1.97885500 |
| C | 0.71903700  | -2.64405100 | -2.19367800 |
| C | -1.48780300 | -3.33038500 | -2.92719400 |
| C | 1.27745700  | -3.22751100 | -3.33161200 |
| H | 1.37894900  | -2.16154800 | -1.47674600 |
| C | -0.92383800 | -3.90857700 | -4.06647400 |
| H | -2.56367500 | -3.38005800 | -2.79040400 |
| C | 0.45623000  | -3.85876700 | -4.26939800 |
| H | 2.35408700  | -3.17740500 | -3.46528800 |
| H | -1.56734200 | -4.39895900 | -4.79239600 |
| H | 0.89105500  | -4.31036900 | -5.15727300 |

**TS1-N-OAc-real**

|    |             |             |             |
|----|-------------|-------------|-------------|
| Ag | 0.92067400  | -0.10086700 | -0.03778600 |
| P  | 1.51330600  | 2.28015000  | -0.25605500 |
| C  | 3.37711900  | 2.23266900  | -0.39531300 |
| H  | 3.79716000  | 3.23814300  | -0.27701600 |
| H  | 3.61162600  | 1.90677500  | -1.41605700 |
| C  | 4.03550300  | 1.27650900  | 0.62074500  |
| H  | 5.12404200  | 1.39601200  | 0.56626500  |
| H  | 3.72698200  | 1.53967800  | 1.64005600  |
| P  | 3.54764600  | -0.51259100 | 0.33270600  |
| C  | -0.52513500 | -2.20633400 | -2.74138400 |
| H  | -0.60265600 | -1.32798800 | -3.39088800 |
| H  | -0.26215100 | -3.06870800 | -3.37381500 |
| C  | -1.90945900 | -2.47808400 | -2.11136500 |
| H  | -2.63995000 | -2.42646700 | -2.93119200 |
| O  | 0.51684400  | -1.91996000 | -1.82429500 |
| N  | -2.23466100 | -1.35398900 | -1.20355400 |
| H  | -1.62204800 | -1.34544400 | -0.37151400 |
| C  | -1.99276800 | -3.88936300 | -1.47599300 |
| H  | -1.69292000 | -4.59447400 | -2.26369300 |
| H  | -1.24163400 | -3.97660700 | -0.68537500 |
| C  | -3.35516000 | -4.29207600 | -0.95087900 |
| C  | -3.63007700 | -4.28239800 | 0.42326600  |
| C  | -4.37557500 | -4.68532200 | -1.83028200 |
| C  | -4.89063500 | -4.64181900 | 0.90573700  |
| H  | -2.84824700 | -3.99135200 | 1.12061700  |
| C  | -5.63720000 | -5.04307200 | -1.35339700 |
| H  | -4.17688600 | -4.71708300 | -2.90011000 |
| C  | -5.89952500 | -5.02020800 | 0.01871400  |
| H  | -5.08213600 | -4.62833000 | 1.97556200  |
| H  | -6.41301200 | -5.34635300 | -2.05174200 |
| H  | -6.88037500 | -5.30138300 | 0.39248400  |

|   |             |             |             |
|---|-------------|-------------|-------------|
| C | -6.17303200 | 1.21219500  | 2.78518500  |
| C | -5.03460900 | 1.17692000  | 1.97697600  |
| C | -5.06584000 | 1.79246000  | 0.72309000  |
| C | -6.21511800 | 2.45008100  | 0.27554600  |
| C | -7.34677900 | 2.48182000  | 1.09049100  |
| C | -7.32852100 | 1.85979400  | 2.34244600  |
| H | -6.15390700 | 0.74084100  | 3.76438900  |
| H | -4.11905700 | 0.70290400  | 2.31523900  |
| H | -6.20605800 | 2.94724100  | -0.68927700 |
| H | -8.24114200 | 2.99839800  | 0.75213900  |
| H | -8.21182500 | 1.88769600  | 2.97507800  |
| S | -3.61602400 | 1.69900000  | -0.36248300 |
| O | -3.62712900 | 2.94622600  | -1.16049200 |
| O | -2.47080000 | 1.42295900  | 0.54645900  |
| C | -3.76705600 | 0.35196300  | -1.45029200 |
| H | -4.54573900 | 0.54127500  | -2.18818100 |
| C | -3.68826800 | -1.04473900 | -0.84800500 |
| H | -3.82478400 | -1.13349800 | 0.23176700  |
| H | -4.35070700 | -1.75391400 | -1.34455400 |
| H | -2.37901200 | -0.20673700 | -1.72720000 |
| O | 0.74126900  | -3.39744600 | 0.39618000  |
| C | 0.14925800  | -2.74679800 | 1.29957700  |
| C | 0.02950800  | -3.37521800 | 2.68428500  |
| H | 0.11568000  | -4.46325500 | 2.62958100  |
| H | 0.84613800  | -2.99571500 | 3.31120800  |
| H | -0.91110700 | -3.08666000 | 3.16176500  |
| O | -0.35505900 | -1.57783700 | 1.15752300  |
| H | 0.59938500  | -2.60380600 | -1.09400300 |
| C | 4.32841200  | -1.41496200 | 1.73638200  |
| C | 3.89116600  | -2.73325300 | 1.96116100  |
| C | 5.29891300  | -0.86784400 | 2.59067100  |
| C | 4.43227200  | -3.48846300 | 3.00199800  |
| H | 3.11468200  | -3.16125500 | 1.33050700  |
| C | 5.82857400  | -1.62368500 | 3.63931400  |
| H | 5.64807700  | 0.15067500  | 2.44904600  |
| C | 5.40074600  | -2.93614300 | 3.84387100  |
| H | 4.08770800  | -4.50680400 | 3.16098400  |
| H | 6.57699500  | -1.18497100 | 4.29428200  |
| H | 5.81453300  | -3.52317000 | 4.65951700  |
| C | 4.58631300  | -0.96156000 | -1.12893700 |
| C | 3.93870500  | -1.35322600 | -2.31113400 |
| C | 5.99025000  | -0.91757100 | -1.10044600 |
| C | 4.68586000  | -1.67550900 | -3.44857800 |
| H | 2.85380600  | -1.42485300 | -2.33557900 |
| C | 6.73156900  | -1.24265200 | -2.23523000 |
| H | 6.50759900  | -0.64467100 | -0.18396800 |
| C | 6.07889700  | -1.61817000 | -3.41369900 |
| H | 4.17491800  | -1.97802700 | -4.35889700 |
| H | 7.81747100  | -1.20800700 | -2.20065700 |
| H | 6.65792900  | -1.87239300 | -4.29770900 |



|   |             |            |             |
|---|-------------|------------|-------------|
| C | 0.96886700  | 3.36630900 | -1.63342100 |
| C | 1.84077600  | 3.98945700 | -2.53917600 |
| C | -0.41668900 | 3.54546600 | -1.78010400 |
| C | 1.33019400  | 4.77868100 | -3.57301300 |
| H | 2.91623500  | 3.86935300 | -2.44971000 |
| C | -0.92093700 | 4.33899900 | -2.80862700 |
| H | -1.11181500 | 3.06935100 | -1.09589500 |
| C | -0.04806900 | 4.95558800 | -3.70881000 |
| H | 2.01364300  | 5.25612700 | -4.27072000 |
| H | -1.99694800 | 4.45389400 | -2.89662100 |
| H | -0.43931800 | 5.56955200 | -4.51599900 |
| C | 1.20638800  | 3.26784700 | 1.26966700  |
| C | 0.23002200  | 2.81917400 | 2.17157500  |
| C | 1.89522100  | 4.46136600 | 1.54240100  |
| C | -0.03912800 | 3.54588400 | 3.33455700  |
| H | -0.34008000 | 1.92158700 | 1.95004600  |
| C | 1.62804900  | 5.18028500 | 2.70630000  |
| H | 2.63267000  | 4.84254100 | 0.84057000  |
| C | 0.66206100  | 4.72031800 | 3.60653500  |
| H | -0.80267400 | 3.19251100 | 4.02187500  |
| H | 2.16784500  | 6.10178600 | 2.90844900  |
| H | 0.45276700  | 5.28343900 | 4.51228700  |

#### TS1-O-OAc-real

|    |             |             |             |
|----|-------------|-------------|-------------|
| Ag | -1.30091700 | 0.13596300  | -0.18023300 |
| P  | -3.73510200 | -0.40298800 | 0.42394600  |
| C  | -3.49583100 | -1.91265800 | 1.52007800  |
| H  | -4.46124900 | -2.40278400 | 1.69370200  |
| H  | -3.13899900 | -1.55170300 | 2.49112700  |
| C  | -2.50148000 | -2.92501900 | 0.91876700  |
| H  | -2.43157600 | -3.81414300 | 1.55687600  |
| H  | -2.87187000 | -3.26502300 | -0.05506600 |
| P  | -0.78347100 | -2.24124300 | 0.57588400  |
| C  | 1.63548000  | 1.55457400  | 1.29737400  |
| H  | 1.07213600  | 0.86611500  | 1.93106400  |
| H  | 2.54887000  | 1.86399600  | 1.81570600  |
| C  | 0.74967200  | 2.73380900  | 0.89624900  |
| H  | 0.30930400  | 3.10409900  | 1.83282600  |
| O  | 2.00049400  | 0.75279500  | 0.13740300  |
| N  | -0.34508600 | 2.26489900  | 0.03005900  |
| H  | 0.00332200  | 2.16931700  | -0.94688900 |
| C  | 1.55767200  | 3.89640100  | 0.25515800  |
| H  | 2.36420800  | 4.18031700  | 0.94445600  |
| H  | 2.02608400  | 3.52805200  | -0.66430800 |
| C  | 0.70835200  | 5.10752900  | -0.06828900 |
| C  | 0.09951400  | 5.23860200  | -1.32659700 |
| C  | 0.49005500  | 6.10709700  | 0.89052100  |
| C  | -0.70924500 | 6.34097400  | -1.61223300 |
| H  | 0.26186000  | 4.47106700  | -2.08047300 |

|   |             |             |             |
|---|-------------|-------------|-------------|
| C | -0.31690700 | 7.20972700  | 0.60552800  |
| H | 0.96399500  | 6.02501800  | 1.86699900  |
| C | -0.92026000 | 7.32917100  | -0.64835000 |
| H | -1.17057000 | 6.42869900  | -2.59256100 |
| H | -0.46957800 | 7.97732200  | 1.36001500  |
| H | -1.54614100 | 8.18871300  | -0.87357500 |
| H | -1.07373500 | 2.97573600  | 0.00443800  |
| O | -1.06548900 | 0.20820300  | -2.53515100 |
| C | -0.22734700 | 0.95421700  | -3.14711800 |
| C | -0.08341200 | 0.69203200  | -4.64999600 |
| H | 0.49422900  | 1.48347600  | -5.13326700 |
| H | 0.42983500  | -0.26540100 | -4.80454900 |
| H | -1.06970600 | 0.60949400  | -5.11811400 |
| O | 0.48752900  | 1.85075900  | -2.63110900 |
| H | 2.54621000  | -0.22671000 | 0.30317900  |
| C | 8.57555000  | 1.40521600  | -0.48544700 |
| C | 7.33554600  | 1.16618700  | 0.10985900  |
| C | 6.78721600  | -0.11657400 | 0.05314200  |
| C | 7.46515800  | -1.16298800 | -0.57751100 |
| C | 8.70249600  | -0.91353700 | -1.17172800 |
| C | 9.25603300  | 0.36920000  | -1.12937800 |
| H | 9.01307000  | 2.39891300  | -0.43965000 |
| H | 6.80292100  | 1.95159000  | 0.63563600  |
| H | 7.03449700  | -2.15916100 | -0.57933900 |
| H | 9.23871600  | -1.72250000 | -1.66052800 |
| H | 10.22147600 | 0.55868600  | -1.59087700 |
| S | 5.16119600  | -0.42585900 | 0.78342200  |
| O | 5.19857000  | -1.82415700 | 1.26450000  |
| O | 4.91774800  | 0.68550100  | 1.73774000  |
| C | 3.94308500  | -0.30781200 | -0.45780000 |
| H | 4.06433800  | -1.01186400 | -1.27546700 |
| C | 3.34741200  | 1.01178100  | -0.70245800 |
| H | 3.81033700  | 1.87477500  | -0.22543800 |
| H | 2.96524100  | 1.21728800  | -1.70019700 |
| C | -0.15826300 | -3.42098800 | -0.69235900 |
| C | -0.14043000 | -3.00522400 | -2.03417000 |
| C | 0.25901700  | -4.72223600 | -0.36707500 |
| C | 0.27840400  | -3.88987700 | -3.03209200 |
| H | -0.44703500 | -1.99427700 | -2.29842800 |
| C | 0.68200900  | -5.59636000 | -1.36789400 |
| H | 0.26694700  | -5.04774700 | 0.66934800  |
| C | 0.69008200  | -5.18173900 | -2.70259000 |
| H | 0.28996500  | -3.56142200 | -4.06811700 |
| H | 1.00714200  | -6.59984400 | -1.10591500 |
| H | 1.02203600  | -5.86385200 | -3.48106900 |
| C | 0.20323400  | -2.62816400 | 2.08108600  |
| C | -0.37626300 | -2.87365400 | 3.33558500  |
| C | 1.60637900  | -2.56812100 | 1.98900200  |
| C | 0.42755300  | -3.05666600 | 4.46458000  |
| H | -1.45563300 | -2.92813100 | 3.44533200  |

|   |             |             |             |
|---|-------------|-------------|-------------|
| C | 2.40838800  | -2.75036500 | 3.11496800  |
| H | 2.08812800  | -2.39077500 | 1.03117800  |
| C | 1.81758000  | -2.99410900 | 4.35828700  |
| H | -0.03838200 | -3.25068900 | 5.42750200  |
| H | 3.48703300  | -2.68794400 | 3.00412100  |
| H | 2.43837900  | -3.13263500 | 5.23930100  |
| C | -4.74133300 | -1.08070600 | -0.96143900 |
| C | -4.22675600 | -0.98556800 | -2.26529500 |
| C | -5.97776700 | -1.71885000 | -0.75570500 |
| C | -4.94248800 | -1.52378800 | -3.33998200 |
| H | -3.26616400 | -0.50529300 | -2.44442300 |
| C | -6.68709400 | -2.25033900 | -1.83143100 |
| H | -6.39487100 | -1.78856700 | 0.24588200  |
| C | -6.16829000 | -2.15359500 | -3.12661100 |
| H | -4.53564700 | -1.44726100 | -4.34464300 |
| H | -7.64267900 | -2.73946100 | -1.66110200 |
| H | -6.72144700 | -2.56924000 | -3.96484400 |
| C | -4.89968400 | 0.63050400  | 1.41337000  |
| C | -4.59887300 | 0.92821600  | 2.75459400  |
| C | -6.02007300 | 1.24298300  | 0.82842800  |
| C | -5.40959800 | 1.78836400  | 3.49469400  |
| H | -3.72270700 | 0.49482500  | 3.23023800  |
| C | -6.82646600 | 2.10876600  | 1.56972900  |
| H | -6.26859000 | 1.04085500  | -0.20864000 |
| C | -6.52864000 | 2.38109100  | 2.90546600  |
| H | -5.16331300 | 1.99807500  | 4.53231800  |
| H | -7.69083700 | 2.56944900  | 1.09864500  |
| H | -7.15854100 | 3.05340300  | 3.48140000  |

### AgHMDS/dppe 3

|    |             |             |             |
|----|-------------|-------------|-------------|
| Ag | 1.25241900  | -0.06265600 | -0.34693900 |
| P  | 0.23969700  | 1.99577900  | 0.31477200  |
| C  | -1.15801400 | 1.83668400  | 1.54710700  |
| H  | -1.36310100 | 2.83345400  | 1.95783600  |
| H  | -0.79043200 | 1.21255700  | 2.36998800  |
| C  | -2.46079000 | 1.24520400  | 0.98287400  |
| H  | -3.21981400 | 1.26221300  | 1.77389200  |
| H  | -2.83590500 | 1.88255500  | 0.17490000  |
| P  | -2.30058000 | -0.49642000 | 0.26926900  |
| N  | 2.23143700  | -1.84280900 | -0.84060200 |
| Si | 1.72490100  | -2.63829300 | -2.28801100 |
| Si | 3.57699900  | -2.23935800 | 0.16764900  |
| C  | 3.83042400  | -4.12059500 | 0.35720600  |
| H  | 4.68743300  | -4.33504200 | 1.00943400  |
| H  | 2.94851900  | -4.60066500 | 0.79980700  |
| H  | 4.02219100  | -4.61257800 | -0.60423500 |
| C  | 5.22076000  | -1.51733300 | -0.46926300 |
| H  | 5.46174500  | -1.89655300 | -1.46987300 |
| H  | 5.16042100  | -0.42328800 | -0.54070600 |

|   |             |             |             |
|---|-------------|-------------|-------------|
| H | 6.06173600  | -1.76304700 | 0.19321200  |
| C | 3.33368600  | -1.54930500 | 1.92793500  |
| H | 2.40637400  | -1.92287000 | 2.38061700  |
| H | 4.16668500  | -1.83914900 | 2.58278200  |
| H | 3.28454500  | -0.45172000 | 1.92967900  |
| C | 3.17333700  | -3.10759600 | -3.43552000 |
| H | 2.81066300  | -3.59970500 | -4.34791600 |
| H | 3.73943600  | -2.21782400 | -3.73887200 |
| H | 3.87830300  | -3.79542600 | -2.95249000 |
| C | 0.74738900  | -4.23792600 | -1.94302000 |
| H | 0.41428400  | -4.71780500 | -2.87314100 |
| H | 1.35195100  | -4.96810800 | -1.39139800 |
| H | -0.14648200 | -4.02907400 | -1.34076600 |
| C | 0.57018300  | -1.51637200 | -3.30711500 |
| H | -0.32855200 | -1.24805800 | -2.73596200 |
| H | 1.07916800  | -0.58948300 | -3.60377900 |
| H | 0.23845100  | -2.02066400 | -4.22480200 |
| C | 1.41665400  | 3.14835400  | 1.13679200  |
| C | 2.37895500  | 3.80342100  | 0.34851100  |
| C | 1.44551600  | 3.32792900  | 2.52765000  |
| C | 3.33547400  | 4.62797500  | 0.93743800  |
| H | 2.37844900  | 3.67052600  | -0.73022600 |
| C | 2.40923200  | 4.15169600  | 3.11541100  |
| H | 0.72462500  | 2.82617500  | 3.16514200  |
| C | 3.35364200  | 4.80432600  | 2.32379700  |
| H | 4.06984300  | 5.12967700  | 0.31335600  |
| H | 2.41805000  | 4.28001500  | 4.19435600  |
| H | 4.10249200  | 5.44380700  | 2.78267500  |
| C | -0.50173100 | 2.99239500  | -1.04169300 |
| C | -0.90518400 | 4.32307800  | -0.83943800 |
| C | -0.70695400 | 2.39800800  | -2.29593800 |
| C | -1.50523000 | 5.04175600  | -1.87264700 |
| H | -0.73809900 | 4.80244100  | 0.12155600  |
| C | -1.31037300 | 3.12049100  | -3.32879400 |
| H | -0.39431000 | 1.37123100  | -2.46533800 |
| C | -1.70963300 | 4.44065300  | -3.11834100 |
| H | -1.81021600 | 6.07158900  | -1.70751900 |
| H | -1.46132500 | 2.65015500  | -4.29643600 |
| H | -2.17491500 | 5.00370300  | -3.92288500 |
| C | -2.01031800 | -1.48570300 | 1.80564800  |
| C | -0.95077600 | -2.40759300 | 1.79120300  |
| C | -2.76495400 | -1.34479600 | 2.98421800  |
| C | -0.65366900 | -3.16947300 | 2.92550200  |
| H | -0.34494700 | -2.52006900 | 0.89560700  |
| C | -2.46640000 | -2.10279300 | 4.11639600  |
| H | -3.60086800 | -0.65043700 | 3.01590700  |
| C | -1.40853400 | -3.01698800 | 4.08837900  |
| H | 0.17000400  | -3.87742700 | 2.89601200  |
| H | -3.05999700 | -1.98351700 | 5.01928900  |
| H | -1.17663000 | -3.60724600 | 4.97102300  |

|   |             |             |             |
|---|-------------|-------------|-------------|
| C | -4.08106200 | -0.80571300 | -0.13984100 |
| C | -4.69054600 | 0.01938500  | -1.10314100 |
| C | -4.81818400 | -1.88394500 | 0.37373500  |
| C | -6.00465100 | -0.20476300 | -1.51142900 |
| H | -4.13285700 | 0.84072900  | -1.54828700 |
| C | -6.13120900 | -2.11433000 | -0.04451300 |
| H | -4.36913300 | -2.54799900 | 1.10540300  |
| C | -6.73180100 | -1.27356400 | -0.98170400 |
| H | -6.45797700 | 0.45068300  | -2.25071300 |
| H | -6.68439400 | -2.95472400 | 0.36714500  |
| H | -7.75392200 | -1.45322300 | -1.30389800 |

**OAc<sup>-</sup>**

|   |             |             |             |
|---|-------------|-------------|-------------|
| O | 0.69616100  | 1.16619500  | 0.00000500  |
| C | 0.22056900  | 0.00178000  | -0.00002400 |
| C | -1.35421400 | -0.05490400 | -0.00000700 |
| H | -1.73338300 | -1.08501600 | -0.00052200 |
| H | -1.75037100 | 0.47185900  | 0.88082500  |
| H | -1.75047200 | 0.47283600  | -0.88020500 |
| O | 0.80835100  | -1.10881200 | 0.00000600  |

**AgOAc/dppe 4**

|    |             |             |             |
|----|-------------|-------------|-------------|
| O  | 0.24419900  | -1.23602100 | 3.45360800  |
| C  | 0.39652300  | -2.45997400 | 3.12849600  |
| C  | 0.66798200  | -3.44990300 | 4.25523900  |
| H  | 1.59843700  | -3.17821000 | 4.76636900  |
| H  | -0.13469400 | -3.39419300 | 4.99845700  |
| H  | 0.74613400  | -4.47003500 | 3.87347800  |
| O  | 0.33725100  | -2.87495400 | 1.93710600  |
| Ag | -0.07623900 | -0.53568600 | 1.31494100  |
| P  | -1.75726900 | 0.35315400  | -0.27291000 |
| C  | -0.75122500 | 0.61902000  | -1.83351000 |
| H  | -1.31634300 | 1.22206000  | -2.55431800 |
| H  | -0.59655000 | -0.37102800 | -2.27985000 |
| C  | 0.60871900  | 1.29320000  | -1.56568100 |
| H  | 1.11756900  | 1.45442100  | -2.52364600 |
| H  | 0.45637700  | 2.27784100  | -1.10608600 |
| P  | 1.69322200  | 0.30273000  | -0.39642700 |
| C  | -2.44583500 | 2.03235700  | 0.06155000  |
| C  | -1.98365700 | 2.72688500  | 1.18991900  |
| C  | -3.39810400 | 2.64387300  | -0.77025600 |
| C  | -2.44987000 | 4.01343200  | 1.47209400  |
| H  | -1.26475900 | 2.25285700  | 1.85419100  |
| C  | -3.86742800 | 3.92531200  | -0.48413300 |
| H  | -3.78825300 | 2.11256200  | -1.63418800 |
| C  | -3.39117700 | 4.61371800  | 0.63555800  |
| H  | -2.08353600 | 4.53855700  | 2.34994600  |
| H  | -4.60861000 | 4.38584300  | -1.13206500 |

|   |             |             |             |
|---|-------------|-------------|-------------|
| H | -3.76016500 | 5.61143600  | 0.85765100  |
| C | -3.18553600 | -0.65558500 | -0.84225300 |
| C | -3.83472600 | -1.44727100 | 0.11942700  |
| C | -3.64658500 | -0.68705400 | -2.16862800 |
| C | -4.93160800 | -2.23440200 | -0.23186900 |
| H | -3.46791900 | -1.45515400 | 1.14269200  |
| C | -4.73872200 | -1.48250100 | -2.52007100 |
| H | -3.15440000 | -0.09880400 | -2.93758200 |
| C | -5.38543600 | -2.25343500 | -1.55218200 |
| H | -5.42189800 | -2.84221700 | 0.52345700  |
| H | -5.08219200 | -1.50056200 | -3.55103000 |
| H | -6.23404100 | -2.87347500 | -1.82820800 |
| C | 3.15750900  | 1.39296100  | -0.14573400 |
| C | 3.48135600  | 2.49196900  | -0.95747700 |
| C | 3.98379900  | 1.09861500  | 0.95247500  |
| C | 4.60890400  | 3.26920500  | -0.68273500 |
| H | 2.85761900  | 2.75264100  | -1.80741100 |
| C | 5.11575100  | 1.86838200  | 1.21850700  |
| H | 3.73139200  | 0.26619800  | 1.60505300  |
| C | 5.43016200  | 2.95697900  | 0.40173900  |
| H | 4.84473900  | 4.11854500  | -1.31875000 |
| H | 5.74486400  | 1.62484700  | 2.07031800  |
| H | 6.30687700  | 3.56309700  | 0.61348000  |
| C | 2.30379200  | -1.06277700 | -1.47828800 |
| C | 1.99200100  | -2.38405500 | -1.11857000 |
| C | 3.05396300  | -0.82522100 | -2.64230400 |
| C | 2.41211300  | -3.44623100 | -1.92581400 |
| H | 1.43428000  | -2.58659100 | -0.20599800 |
| C | 3.47298500  | -1.88780900 | -3.44096900 |
| H | 3.32543600  | 0.19094500  | -2.91835800 |
| C | 3.14832500  | -3.20088700 | -3.08466000 |
| H | 2.16573700  | -4.46484900 | -1.63888700 |
| H | 4.05564500  | -1.69408100 | -4.33798300 |
| H | 3.47677400  | -4.02868800 | -3.70784200 |

#### HMDS-

|    |             |             |             |
|----|-------------|-------------|-------------|
| N  | -0.00004100 | 0.00106900  | 0.00174600  |
| Si | -1.64478600 | 0.00036200  | 0.00039200  |
| Si | 1.64467800  | 0.00041400  | -0.00006300 |
| C  | 2.44891100  | 1.70240400  | -0.41085300 |
| H  | 3.54904700  | 1.66656600  | -0.40068300 |
| H  | 2.13571000  | 2.05129900  | -1.40437000 |
| H  | 2.13335100  | 2.46600000  | 0.31310500  |
| C  | 2.44963100  | -0.49571500 | 1.67836700  |
| H  | 2.13332400  | 0.18741700  | 2.47846400  |
| H  | 2.13789800  | -1.50637000 | 1.97541800  |
| H  | 3.54970000  | -0.48199500 | 1.64230000  |
| C  | 2.44549600  | -1.20750900 | -1.26915300 |
| H  | 2.12927000  | -0.96231700 | -2.29222500 |

|   |             |             |             |
|---|-------------|-------------|-------------|
| H | 3.54560500  | -1.18299100 | -1.24386400 |
| H | 2.13005400  | -2.24143700 | -1.07325200 |
| C | -2.44953800 | 1.75032900  | -0.03908900 |
| H | -3.54956800 | 1.71210000  | -0.04877800 |
| H | -2.14391200 | 2.33847800  | 0.83700300  |
| H | -2.12692800 | 2.30684600  | -0.92957300 |
| C | -2.44669500 | -0.90907800 | -1.49675500 |
| H | -3.54681700 | -0.88705500 | -1.46744600 |
| H | -2.12890900 | -0.45273900 | -2.44419800 |
| H | -2.13423800 | -1.96185600 | -1.52531200 |
| C | -2.44770100 | -0.84215700 | 1.53562400  |
| H | -2.13239400 | -1.89177400 | 1.61151800  |
| H | -2.13220800 | -0.34317300 | 2.46205200  |
| H | -3.54780700 | -0.82499500 | 1.50417500  |

## 7. Absolute energies and Imaginary frequency for the computed structures

| Geometries    | $E(\text{gas phase})/\text{a.u.}$ | $G(\text{gas phase, 298K})/\text{a.u.}$ | $E(\text{DMF})/\text{a.u.}$ | $G(\text{DMF, 298K})/\text{a.u.}$ | Imaginary Frequency ( $\text{cm}^{-1}$ ) |
|---------------|-----------------------------------|-----------------------------------------|-----------------------------|-----------------------------------|------------------------------------------|
| 1             | -480.73844                        | -480.56585                              | -480.55351                  | -480.38092                        | 0                                        |
| 2             | -858.19771                        | -858.09015                              | -857.99901                  | -857.89145                        | 0                                        |
| TS1-N-non     | -1338.88420                       | -1338.58490                             | -1338.54017                 | -1338.24088                       | -1465.54                                 |
| TS1-O-non     | -1338.87601                       | -1338.57657                             | -1338.52163                 | -1338.22219                       | -1461.41                                 |
| N-adduct      | -1338.97223                       | -1338.66671                             | -1338.62220                 | -1338.31668                       | 0                                        |
| O-adduct      | -1338.96676                       | -1338.66089                             | -1338.60569                 | -1338.29982                       | 0                                        |
| Geometries    | $E(\text{gas phase})/\text{a.u.}$ | $G(\text{gas phase, 253K})/\text{a.u.}$ | $E(\text{DMF})/\text{a.u.}$ | $G(\text{DMF, 253K})/\text{a.u.}$ | Imaginary Frequency ( $\text{cm}^{-1}$ ) |
| 1             | -480.73844                        | -480.55882                              | -480.55351                  | -480.37389                        | 0                                        |
| 2             | -858.19771                        | -858.08320                              | -857.99901                  | -857.88450                        | 0                                        |
| 3'            | -1941.36288                       | -1940.97358                             | -1941.07754                 | -1940.68823                       | 0                                        |
| 4'            | -1296.53552                       | -1296.31668                             | -1296.35377                 | -1296.13494                       | 0                                        |
| N-adduct      | -1338.97223                       | -1338.65591                             | -1338.62220                 | -1338.30588                       | 0                                        |
| O-adduct      | -1338.96676                       | -1338.65014                             | -1338.60569                 | -1338.28907                       | 0                                        |
| ADD1-O        | -2422.11327                       | -2421.52733                             | -2421.64043                 | -2421.05449                       | 0                                        |
| TS1-O         | -2422.09867                       | -2421.51642                             | -2421.62563                 | -2421.04338                       | -1049.93                                 |
| ADD2-O        | -2422.12546                       | -2421.54243                             | -2421.63936                 | -2421.05633                       | 0                                        |
| ADD1-N        | -2422.10254                       | -2421.51779                             | -2421.63281                 | -2421.04805                       | 0                                        |
| TS1-N         | -2422.07976                       | -2421.49805                             | -2421.61533                 | -2421.03361                       | -1237.43                                 |
| ADD2-N        | -2422.10519                       | -2421.52159                             | -2421.62979                 | -2421.04619                       | 0                                        |
| ADD3-O        | -3280.32128                       | -3279.61098                             | -3279.66639                 | -3278.95609                       | 0                                        |
| TS2-O         | -3280.31319                       | -3279.59700                             | -3279.66606                 | -3278.94987                       | -153.45                                  |
| ADD4-O        | -3280.31544                       | -3279.59771                             | -3279.68050                 | -3278.96277                       | 0                                        |
| TS3-O         | -3280.28836                       | -3279.56771                             | -3279.66817                 | -3278.94753                       | -1199.59                                 |
| ADD5-O        | -3280.30002                       | -3279.57563                             | -3279.68156                 | -3278.95717                       | 0                                        |
| ADD3'-O       | -3280.33947                       | -3279.62434                             | -3279.68089                 | -3278.96576                       | 0                                        |
| TS2'-O        | -3280.32876                       | -3279.60960                             | -3279.67336                 | -3278.95420                       | -213.38                                  |
| ADD4'-O       | -3280.34875                       | -3279.62822                             | -3279.69826                 | -3278.97773                       | 0                                        |
| TS3'-O        | -3280.29834                       | -3279.57668                             | -3279.66449                 | -3278.94283                       | -1345.67                                 |
| ADD5'-O       | -3280.34681                       | -3279.62422                             | -3279.69667                 | -3278.97408                       | 0                                        |
| ADD3-N        | -3280.31436                       | -3279.59345                             | -3279.66804                 | -3278.94713                       | 0                                        |
| TS2-N         | -3280.28688                       | -3279.57062                             | -3279.63406                 | -3278.91779                       | -1635.82                                 |
| ADD4-N        | -3280.36290                       | -3279.64292                             | -3279.71364                 | -3278.99365                       | 0                                        |
| TS3-N         | -3280.33550                       | -3279.61531                             | -3279.69932                 | -3278.97913                       | -1090.42                                 |
| ADD5-N        | -3280.35090                       | -3279.62782                             | -3279.71270                 | -3278.98962                       | 0                                        |
| ADD1'         | -2422.11371                       | -2421.53119                             | -2421.64240                 | -2421.05988                       | 0                                        |
| TS1'-N        | -3280.28271                       | -3279.56414                             | -3279.63740                 | -3278.91883                       | -1568.85                                 |
| ADD2'-N       | -3280.35297                       | -3279.63259                             | -3279.70857                 | -3278.98819                       | 0                                        |
| TS1'-O        | -3280.25078                       | -3279.53481                             | -3279.60957                 | -3278.89360                       | -1297.41                                 |
| TS1-O-Cu-HMDS | -2472.45645                       | -2471.87318                             | -2472.02545                 | -2471.44218                       | -1115.76                                 |
| TS1-O-Cu-Bu   | -1756.93258                       | -1756.44956                             | -1756.56119                 | -1756.07818                       | -1147.91                                 |
| ADD1-OAc      | -1777.30321                       | -1776.88345                             | -1776.92853                 | -1776.50878                       | 0                                        |
| TS1-N-OAc     | -2635.45893                       | -2634.90757                             | -2634.91761                 | -2634.36624                       | -1609.63                                 |
| ADD2-N-OAc    | -2635.53057                       | -2634.97473                             | -2634.98500                 | -2634.42916                       | 0                                        |



|                   |             |             |             |             |          |
|-------------------|-------------|-------------|-------------|-------------|----------|
| TS1-O-OAc         | -2635.43635 | -2634.88631 | -2634.88952 | -2634.33948 | -1391.07 |
| ADD1-O-real       | -3189.03020 | -3188.24571 | -3188.17621 | -3187.39172 | 0        |
| TS1-O-real        | -3189.01544 | -3188.23530 | -3188.15937 | -3187.37923 | -1106.93 |
| ADD2-O-real       | -3189.04229 | -3188.25953 | -3188.17654 | -3187.39378 | 0        |
| ADD3-O-real       | -4047.24026 | -4046.32842 | -4046.20119 | -4045.28935 | 0        |
| TS2-O-real        | -4047.23214 | -4046.31608 | -4046.19973 | -4045.28367 | -160.54  |
| ADD4-O-real       | -4047.23408 | -4046.31510 | -4046.21034 | -4045.29135 | 0        |
| TS3-O-real        | -4047.20390 | -4046.28297 | -4046.19915 | -4045.27822 | -1170.77 |
| ADD5-O-real       | -4047.21613 | -4046.29455 | -4046.21369 | -4045.29211 | 0        |
| ADD3-N-real       | -4047.22441 | -4046.30395 | -4046.20174 | -4045.28127 | 0        |
| TS2-N-real        | -4047.19650 | -4046.28061 | -4046.16962 | -4045.25374 | -1636.96 |
| ADD4-N-real       | -4047.27569 | -4046.35304 | -4046.25083 | -4045.32818 | 0        |
| TS3-N-real        | -4047.24918 | -4046.32977 | -4046.22584 | -4045.30644 | -964.06  |
| ADD5-N-real       | -4047.26717 | -4046.34376 | -4046.24787 | -4045.32446 | 0        |
| TS1'-N-real       | -4047.19442 | -4046.27645 | -4046.17088 | -4045.25291 | -1553.69 |
| TS1-N-OAc-real    | -3402.37430 | -3401.62330 | -3401.44633 | -3400.69534 | -1601.54 |
| TS1-O-OAc-real    | -3402.35344 | -3401.60283 | -3401.42133 | -3400.67072 | -1333.09 |
| AgHMDS/dppe 3     | -2708.27891 | -2707.69115 | -2707.60986 | -2707.02211 | 0        |
| OAc <sup>-</sup>  | -228.49317  | -228.46756  | -228.56120  | -228.53558  | 0        |
| AgOAc/dppe 4      | -2063.45487 | -2063.03791 | -2062.88378 | -2062.46682 | 0        |
| HMDS <sup>-</sup> | -873.34316  | -873.15257  | -873.26263  | -873.07204  | 0        |

Note:  $E(\text{gas phase})$  is the potential energy in gas phase,  $G(\text{gas phase})$  is the free energy in gas phase,  $E(\text{DMF})$  is the potential energy in DMF,  $G(\text{DMF})$  is the free energy in DMF.
